# Supplementary material for: Asymmetric hydrogenation of an α-unsaturated carboxylic acid catalyzed by intact chiral transition metal carbonyl clusters – diastereomeric control of enantioselectivity
Source: Royal Society of Chemistry journal article supplement (doi:10.1039/c9dt04799a), 2020-01-01
Supplement: c9dt04799a1.pdf [file c9dt04799a1.pdf]

## Supplementary Information

### Asymmetric hydrogenation of an $\alpha$ -unsaturated carboxylic acid catalyzed by intact chiral transition metal carbonyl clusters – diastereomeric control of enantioselectivity

Ahmed F. Abdel-Magied,<sup>a</sup> Yusuf Theibich,<sup>a</sup> Amrendra K. Singh,<sup>a</sup> Ahibur Rahaman,<sup>a</sup> Isa Doverbratt,<sup>b</sup> Arun K. Raha,<sup>a</sup> Matti Haukka,<sup>c</sup> Michael G. Richmond,<sup>d</sup> and Ebbe Nordlander<sup>\*a</sup>

<sup>a\*</sup> Chemical Physics, Chemical Centre, Lund University, BOX 124, SE-221 00, Lund, Sweden.  
Email: [Ebbe.Nordlander@chemphys.lu.se](mailto:Ebbe.Nordlander@chemphys.lu.se)

<sup>b</sup> Centre for Analysis and Synthesis, Department of Chemistry, Lund University, BOX 124, SE-221 00, Lund, Sweden.

<sup>c</sup> Department of Chemistry, University of Jyväskylä, Box 35, FI-400 14, Jyväskylä, Finland.

<sup>d</sup> Department of Chemistry, The University of North Texas, Denton, Texas 76203, United States.

#### Table of Contents

|                                                                                                                                                                                    |      |
|------------------------------------------------------------------------------------------------------------------------------------------------------------------------------------|------|
| 1- <sup>1</sup> H NMR for clusters <b>3–22</b> .....                                                                                                                               | S2   |
| 2- Catalytic activity for catalysts/catalyst precursors <b>3–22</b> assigned by <sup>1</sup> H NMR .....                                                                           | S22  |
| 3- Computational Details .....                                                                                                                                                     | S60  |
| 4- Crystallographic refinement.....                                                                                                                                                | S99  |
| 5- Table S1 Crystallographic data for clusters [( $\mu$ -H) <sub>2</sub> Ru <sub>3</sub> ( $\mu$ <sub>3</sub> -S)(CO) <sub>7</sub> ( $\mu$ -P-P*)] <b>3–6, 8, 17, and 20</b> ..... | S100 |



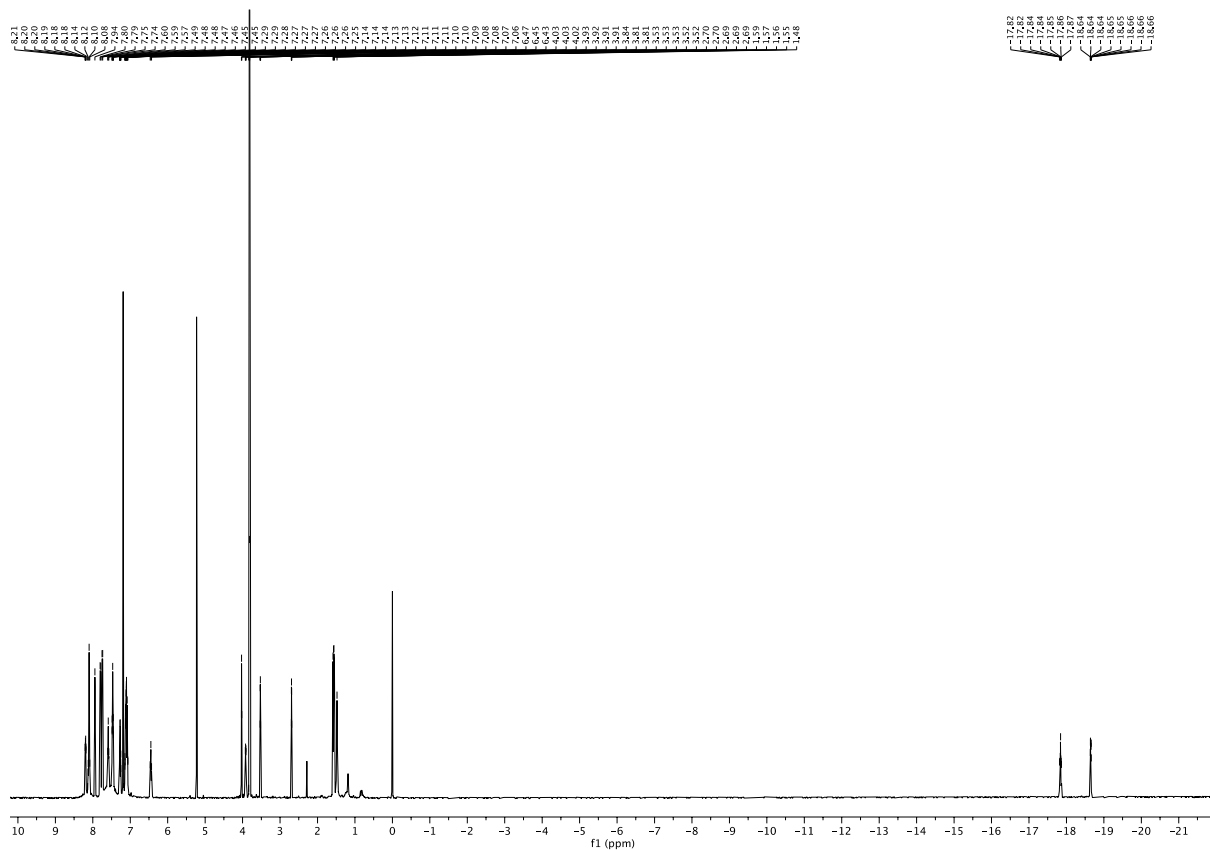

**Figure S2.**  $^1\text{H}$  NMR of **4**:  $^1\text{H}$  NMR (500 MHz,  $\text{CDCl}_3$ )  $\delta$  8.19 (td,  $J = 4.9, 2.4$  Hz, 1H), 8.11 (d,  $J = 11.0$  Hz, 3H), 7.94 (s, 1H), 7.77 (dd,  $J = 25.5, 8.9$  Hz, 4H), 7.58 (m, 1H), 7.47 (m, 3H), 7.27 (tt,  $J = 7.3, 1.4$  Hz, 1H), 7.10 (m, 3H), 6.45 (t,  $J = 8.5$  Hz, 1H), 4.03 (t,  $J = 2.7$  Hz, 1H), 3.92 (dd,  $J = 7.1, 2.8$  Hz, 1H), 3.81 (s, 5H), 3.53 (dt,  $J = 2.6, 1.2$  Hz, 1H), 2.69 (dt,  $J = 2.5, 1.1$  Hz, 1H), 1.57 (dd,  $J = 12.1, 7.1$  Hz, 3H), 1.48 (s, 2H),  $-17.82$  (ddd,  $J = 12.2, 8.8, 3.5$  Hz, 1H),  $-18.63$  (ddd,  $J = 7.5, 3.5, 2.2$  Hz, 1H).



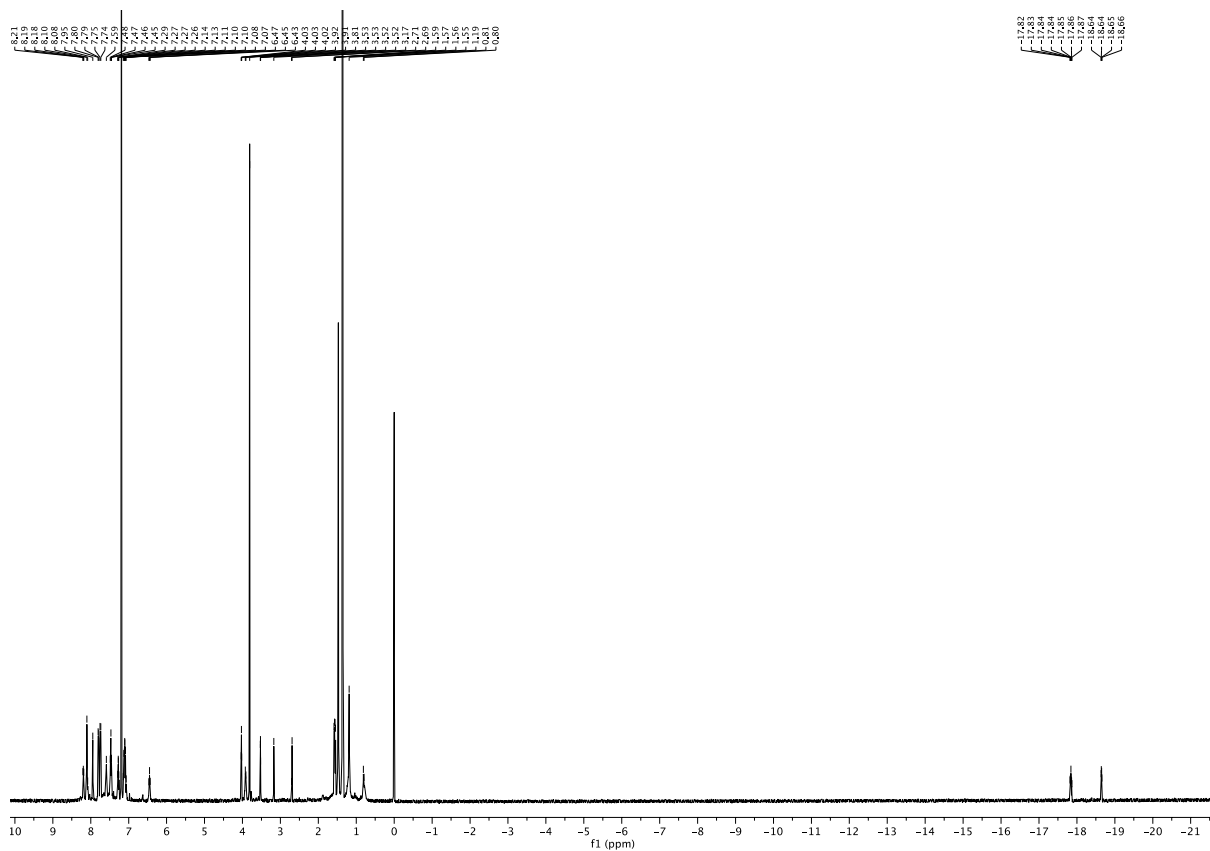

**Figure S4.**  $^1\text{H}$  NMR of **6**:  $^1\text{H}$  NMR (500 MHz,  $\text{CDCl}_3$ )  $\delta$  8.19 (m, 1H), 8.10 (s, 2H), 7.95 (s, 1H), 7.77 (dd,  $J = 25.5, 8.9$  Hz, 4H), 7.59 (s, 1H), 7.47 (t,  $J = 7.7$  Hz, 2H), 7.27 (t,  $J = 7.5$  Hz, 1H), 7.11 (m, 3H), 6.45 (t,  $J = 8.5$  Hz, 1H), 4.03 (t,  $J = 2.7$  Hz, 1H), 3.92 (d,  $J = 7.0$  Hz, 1H), 3.81 (s, 5H), 3.53 (dd,  $J = 2.5, 1.4$  Hz, 1H), 2.70 (d,  $J = 6.4$  Hz, 1H), 1.57 (dd,  $J = 12.2, 7.0$  Hz, 2H), 1.19 (s, 3H), 0.79 (m, 2H), -17.84 (ddd,  $J = 12.4, 9.1, 3.0$  Hz, 1H), -18.65 (ddd,  $J = 7.1, 3.2, 3.0$  Hz, 1H).





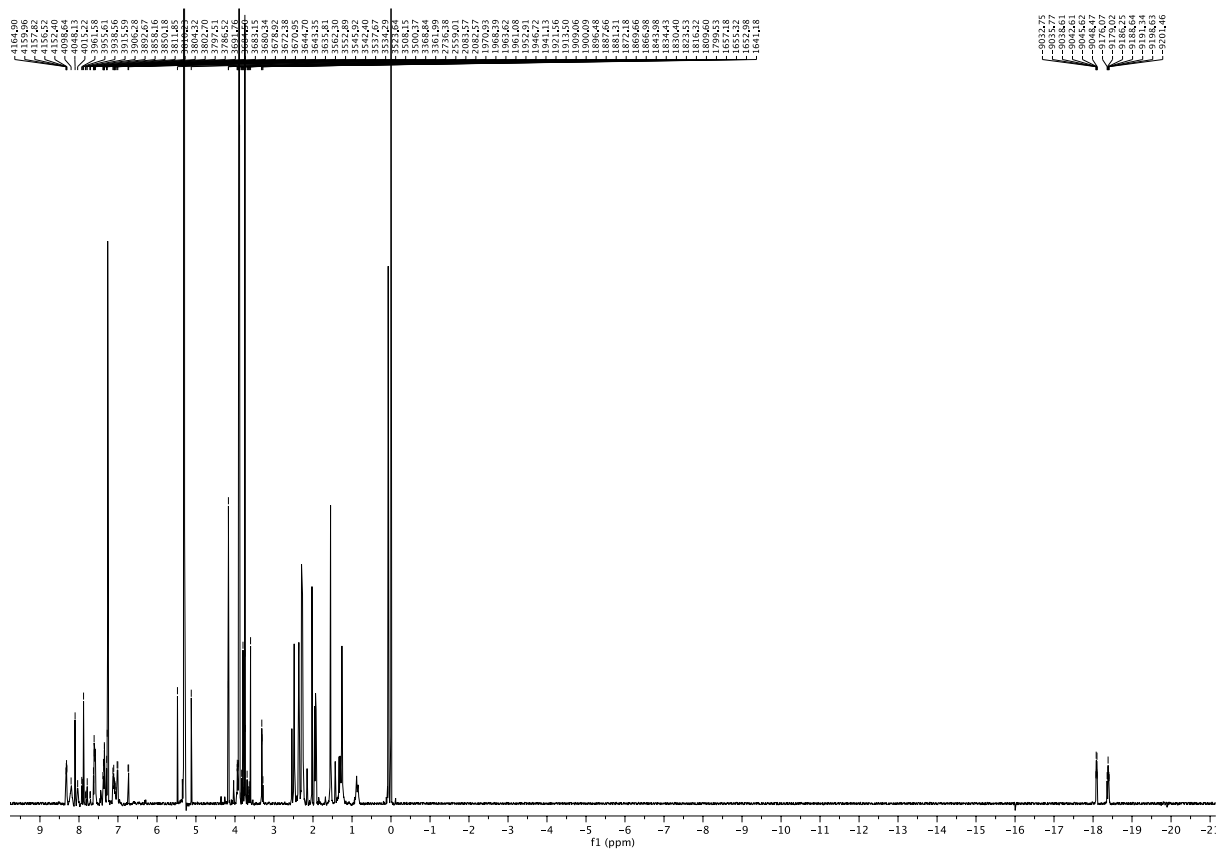

**Figure S7.**  $^1\text{H}$  NMR of **9**:  $^1\text{H}$  NMR (500 MHz,  $\text{CDCl}_3$ )  $\delta$  8.32 (m, 1H), 8.20 (s, 1H), 8.10 (s, 1H), 7.98 (m, 1H), 7.88 (s, 1H), 7.76 (m, 1H), 7.60 (m, 3H), 7.35 (m, 1H), 7.28 (d,  $J = 7.5$  Hz, 1H), 7.06 (m, 2H), 6.73 (d,  $J = 6.9$  Hz, 2H), 5.48 (s, 5H), 5.12 (s, 2H), 4.17 (d,  $J = 1.0$  Hz, 1H), 3.89 (d,  $J = 5.6$  Hz, 10H), 3.71 (m, 7H), 3.29 (m, 4H), -18.09 (dt,  $J = 9.6, 2.8$  Hz, 1H), -18.39 (ddd,  $J = 12.8, 10.2, 2.9$  Hz, 1H).







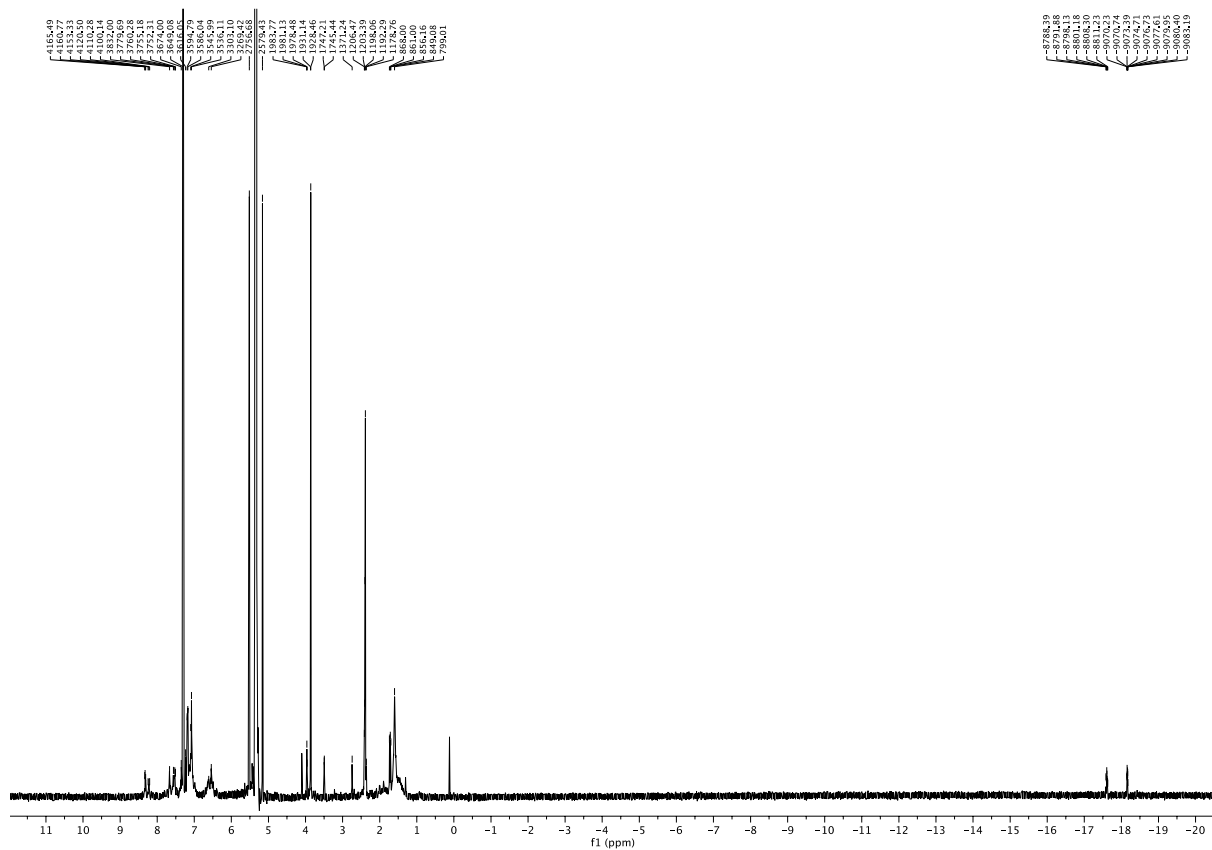

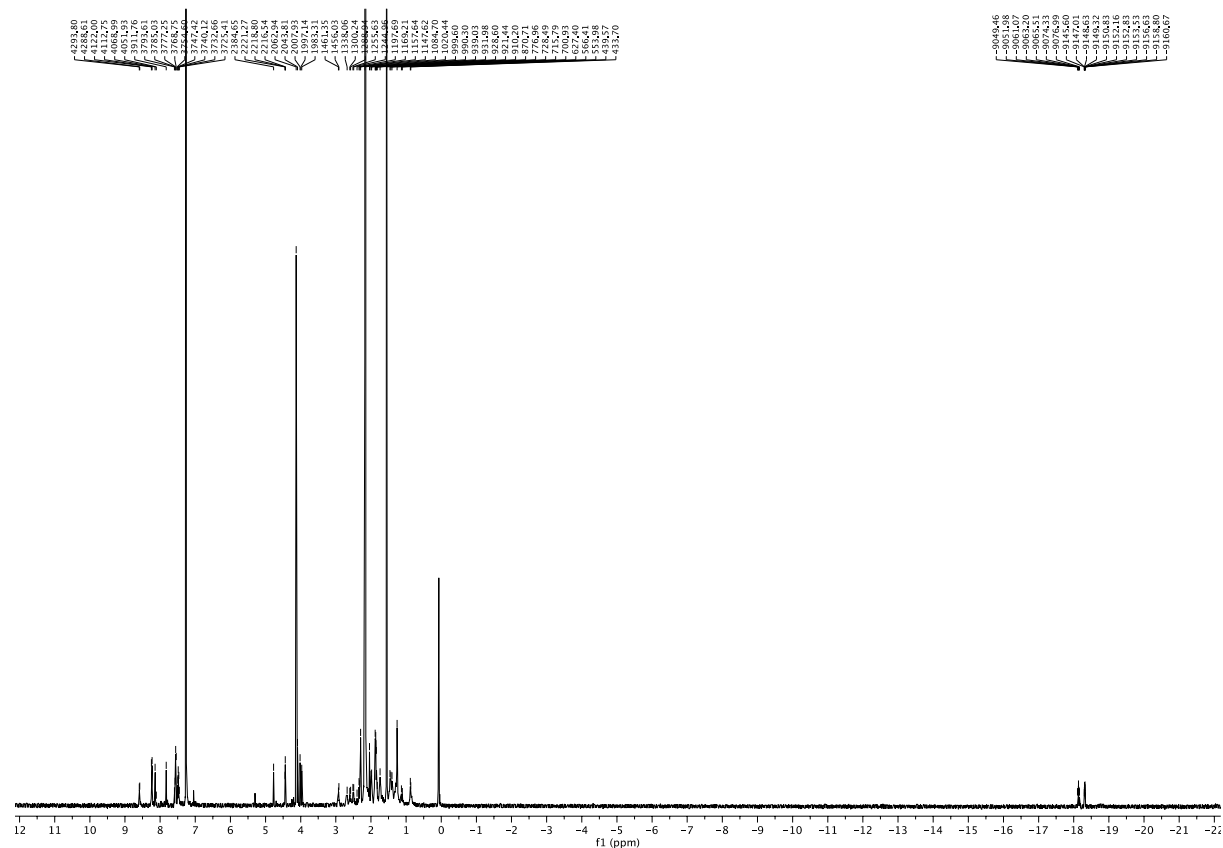

**Figure S11.**  $^1\text{H}$  NMR of **13**:  $^1\text{H}$  NMR (500 MHz,  $\text{CDCl}_3$ )  $\delta$  8.59 (d,  $J = 5.2$  Hz, 1H), 8.24 (d,  $J = 9.3$  Hz, 2H), 8.12 (d,  $J = 17.1$  Hz, 1H), 7.83 (s, 1H), 7.53 (ddd,  $J = 36.1, 15.6, 8.0$  Hz, 5H), 4.77 (s, 1H), 4.44 (t,  $J = 2.4$  Hz, 1H), 4.13 (s, 5H), 3.99 (d,  $J = 24.6$  Hz, 1H), 2.59 (m, 2H), 2.32 (d,  $J = 21.6$  Hz, 2H), 1.99 (d,  $J = 9.3$  Hz, 2H), 1.86 (dd,  $J = 10.5, 7.1$  Hz, 4H), 1.74 (s, 3H), 1.55 (s, 13H),  $-18.14$  (ddd,  $J = 13.8, 4.5, 2.5$  Hz, 1H),  $-18.31$  ('m', ddd,  $J =$  not resolved 1H).



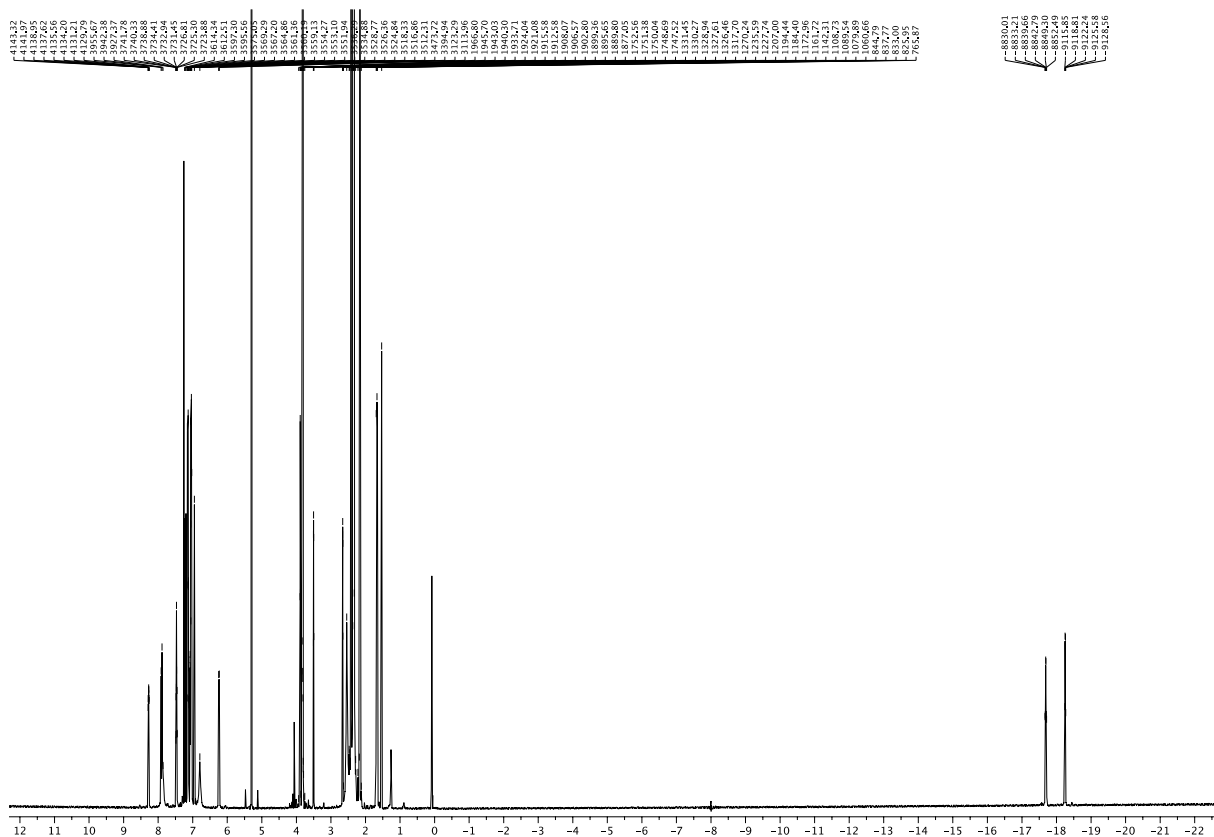

**Figure S13.**  $^1\text{H}$  NMR of **15**:  $^1\text{H}$  NMR (500 MHz,  $\text{CDCl}_3$ )  $\delta$  8.28 (ddd,  $J = 7.8, 4.4, 1.4$  Hz, 1H), 7.89 (t,  $J = 14.2$  Hz, 2H), 7.47 (tt,  $J = 7.6, 1.4$  Hz, 1H), 7.21 (m, 2H), 7.13 (m, 3H), 7.04 (m, 4H), 6.95 (s, 1H), 6.79 (s, 1H), 6.24 (d,  $J = 9.3$  Hz, 1H), 3.83 (s, 7H), 3.50 (dt,  $J = 2.5, 1.2$  Hz, 1H), 2.66 (dt,  $J = 2.5, 1.2$  Hz, 1H), 2.38 (d,  $J = 34.0$  Hz, 21H), 2.16 (s, 3H), 1.67 (dd,  $J = 11.8, 7.0$  Hz, 3H),  $-17.69$  (td,  $J = 9.7, 3.0$  Hz, 1H),  $-18.25$  (dt,  $J = 6.4, 3.0$  Hz, 1H).



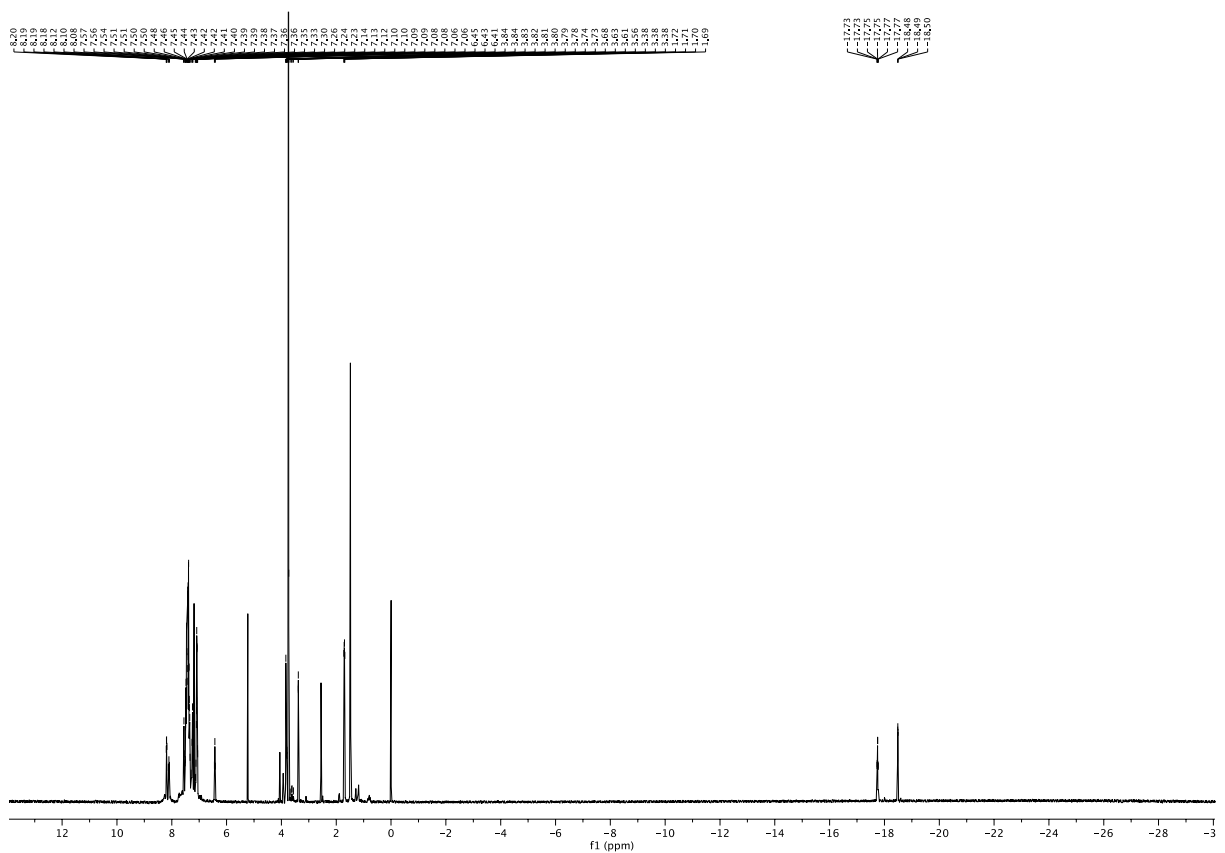

**Figure S15.**  $^1\text{H}$  NMR of **17**:  $^1\text{H}$  NMR (500 MHz,  $\text{CDCl}_3$ )  $\delta$  8.19 (dd,  $J = 7.8, 4.5$  Hz, 1H), 8.10 (m, 1H), 7.56 (t,  $J = 7.2$  Hz, 1H), 7.41 (m, 14H), 7.24 (t,  $J = 7.4$  Hz, 1H), 7.09 (qd,  $J = 9.5, 8.9, 4.2$  Hz, 4H), 6.43 (t,  $J = 8.5$  Hz, 1H), 3.82 (m, 1H), 3.74 (s, 6H), 3.62 (dd,  $J = 33.4, 25.7$  Hz, 1H), 3.38 (m, 1H), 1.70 (dd,  $J = 11.9, 7.0$  Hz, 4H), -17.75 (ddd,  $J = 10.1, 9.1, 3.0$  Hz, 1H), -18.47 (dt,  $J = 6.1, 3.0$  Hz, 1H).





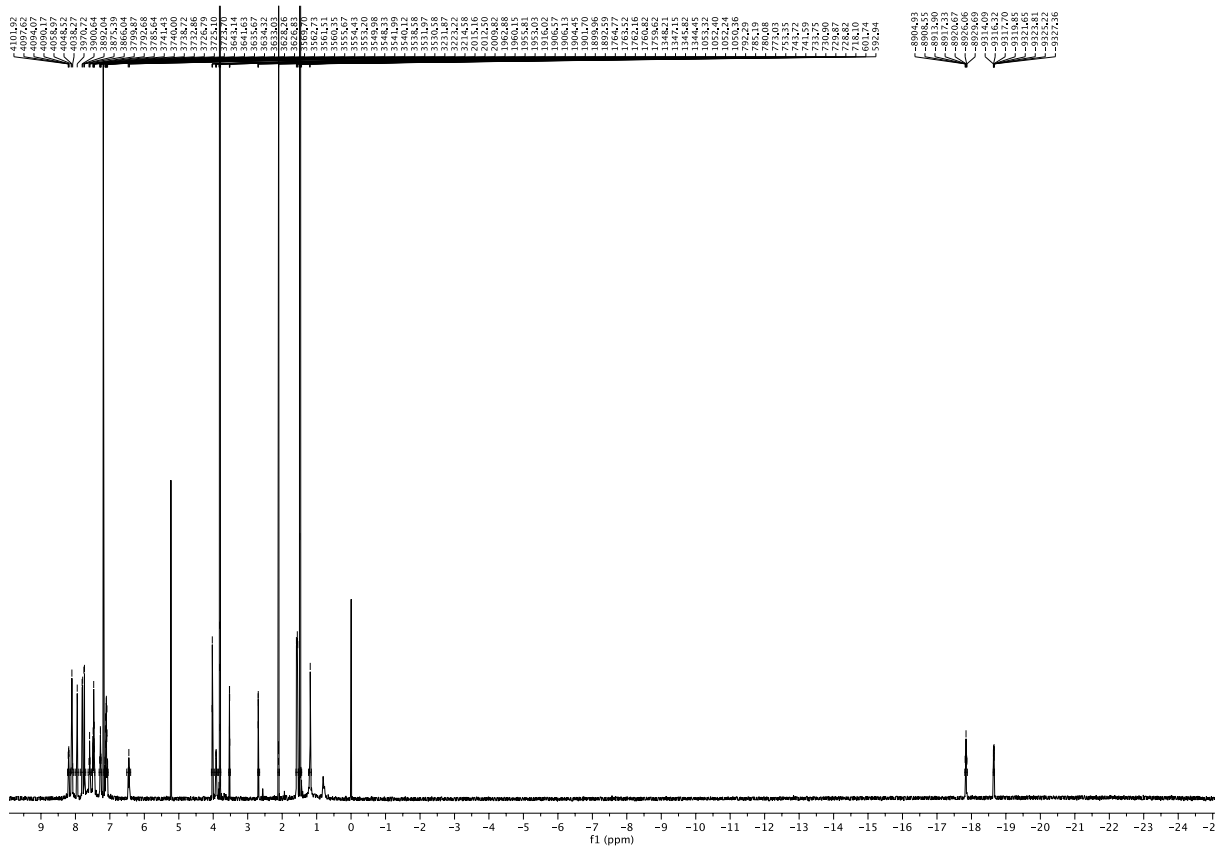





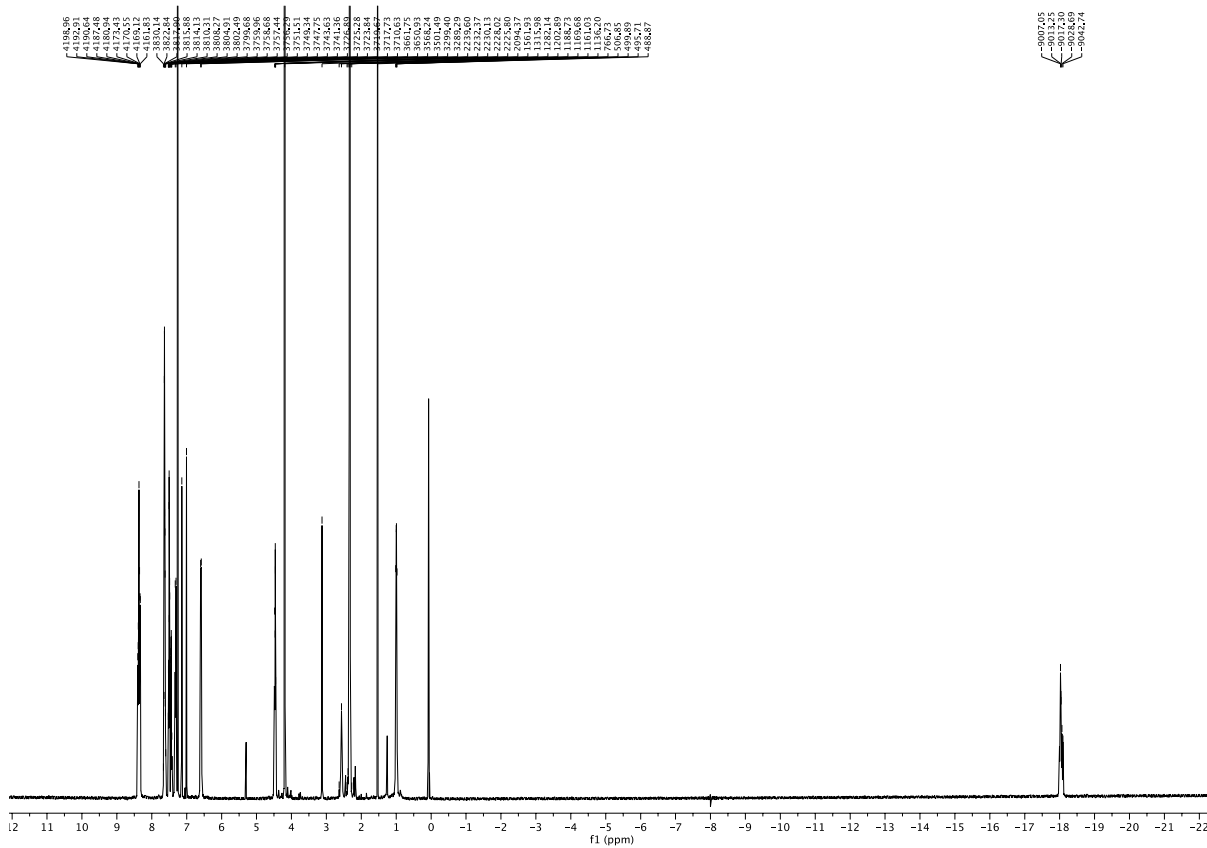

**Figure S20.**  $^1\text{H}$  NMR of **22**:  $^1\text{H}$  NMR (500 MHz,  $\text{CDCl}_3$ )  $\delta$  8.36 (m, 4H), 7.63 (h,  $J = 5.8, 5.4$  Hz, 3H), 7.51 (m, 2H), 7.44 (m, 1H), 7.32 (d,  $J = 10.8$  Hz, 2H), 7.14 (s, 1H), 7.01 (s, 1H), 6.59 (d,  $J = 10.1$  Hz, 2H), 4.47 (m, 2H), 4.19 (s, 5H), 3.13 (s, 1H), 2.57 (s, 1H), 2.33 (d,  $J = 8.6$  Hz, 11H), 1.53 (s, 1H), 1.00 (dd,  $J = 11.1, 6.9$  Hz, 3H),  $-17.93$  (ddd,  $J = 11.8, 2.0$  Hz, 1H),  $-18.10$  (m, ddd,  $J = 23.4, 10.4, 2.0$  Hz, 1H).

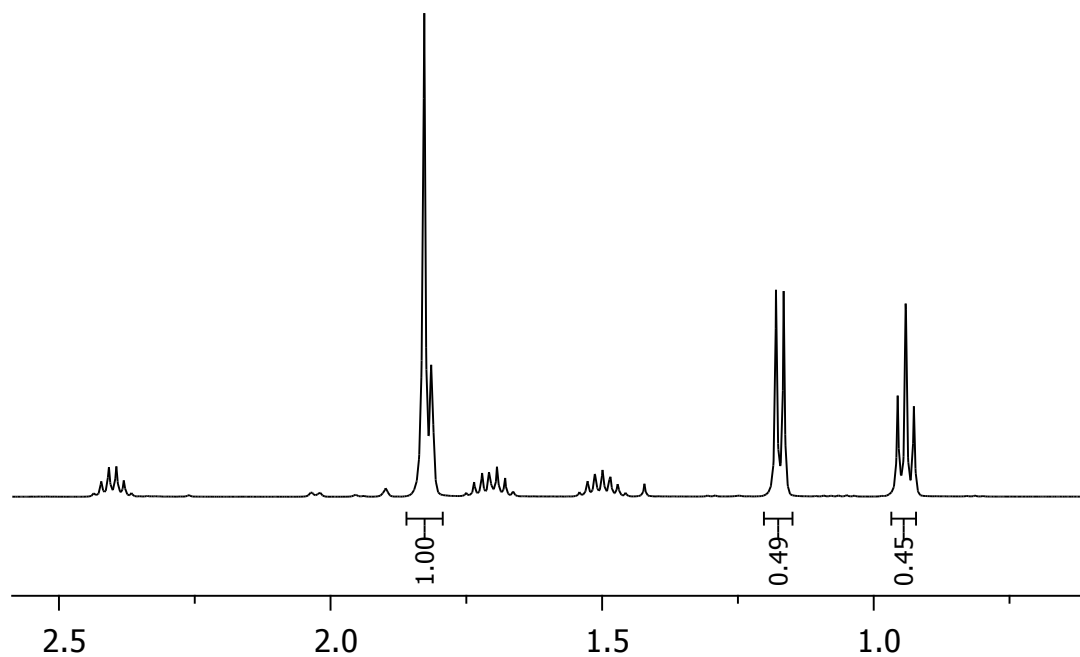

**Figure S21.** Determination of catalytic asymmetric hydrogenation conversion percentage by using <sup>1</sup>H NMR spectroscopy. Analysis of products from hydrogenation of tiglic acid using  $[(\mu\text{-H})_2\text{Ru}_3(\mu_3\text{-S})(\text{CO})_7(\mu\text{-1,2-1a})]$  **3**.

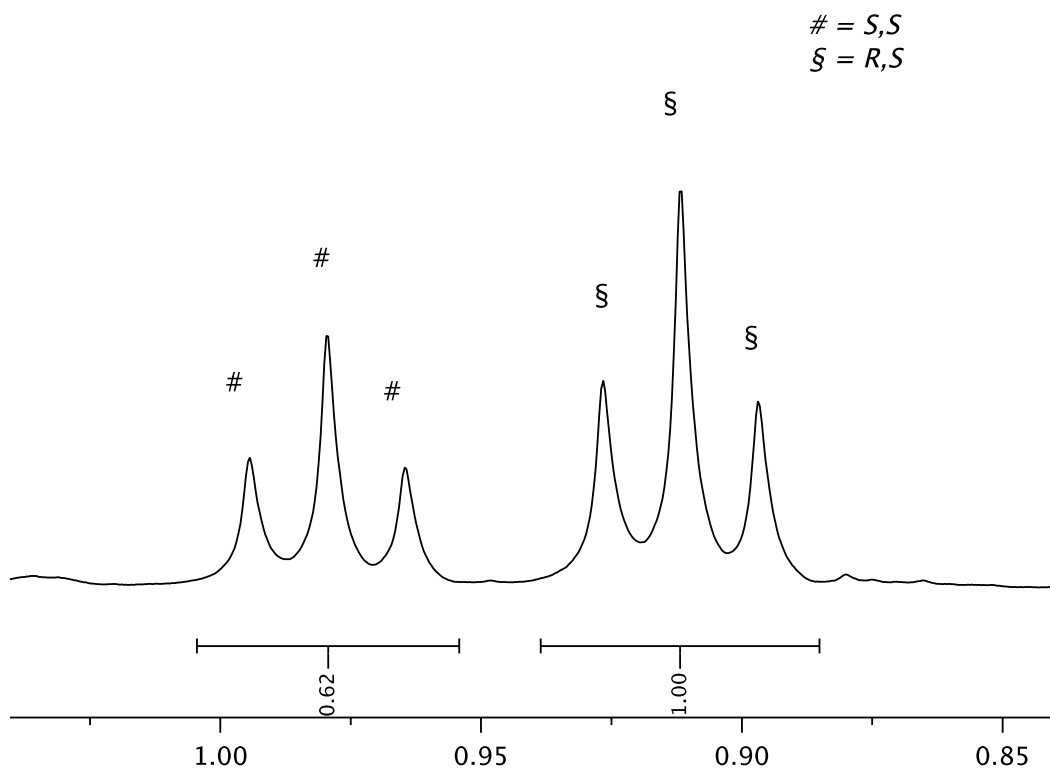

**Figure S22.** Determination of enantiomeric excess by using <sup>1</sup>H NMR spectroscopy. Analysis of products from hydrogenation of tiglic acid using  $[(\mu\text{-H})_2\text{Ru}_3(\mu_3\text{-S})(\text{CO})_7(\mu\text{-1,2-1a})]$  **3**.

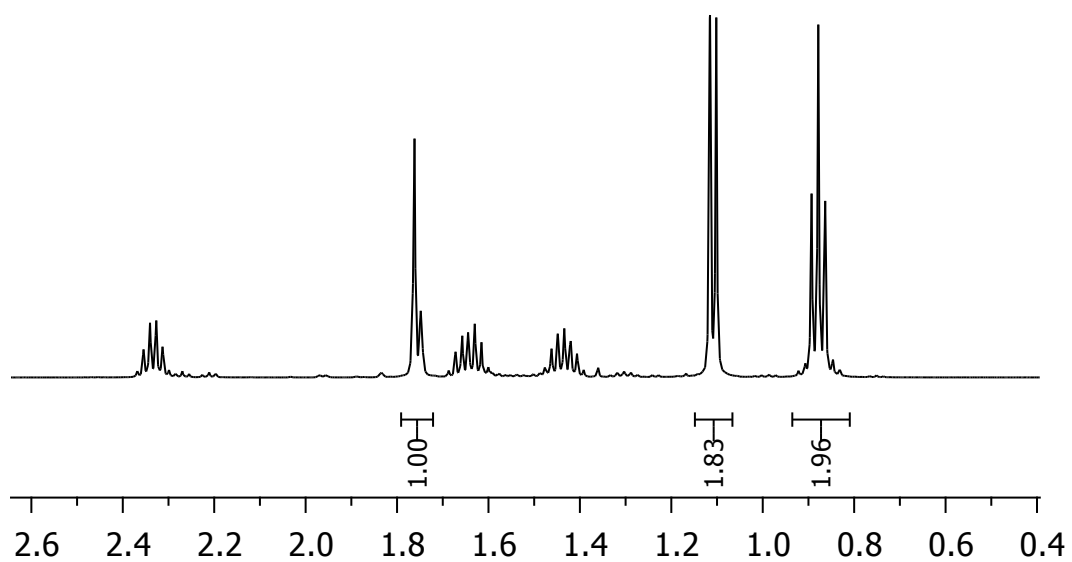

**Figure S23.** Determination of catalytic asymmetric hydrogenation conversion percentage by using <sup>1</sup>H NMR spectroscopy. Analysis of products from hydrogenation of tiglic acid using  $[(\mu\text{-H})_2\text{Ru}_3(\mu_3\text{-S})(\text{CO})_7(\mu\text{-1,2-1a})]$  **4**.



# = *S,S*  
§ = *R,S*  
\* = Impurity (unreacted hydrogenated product)

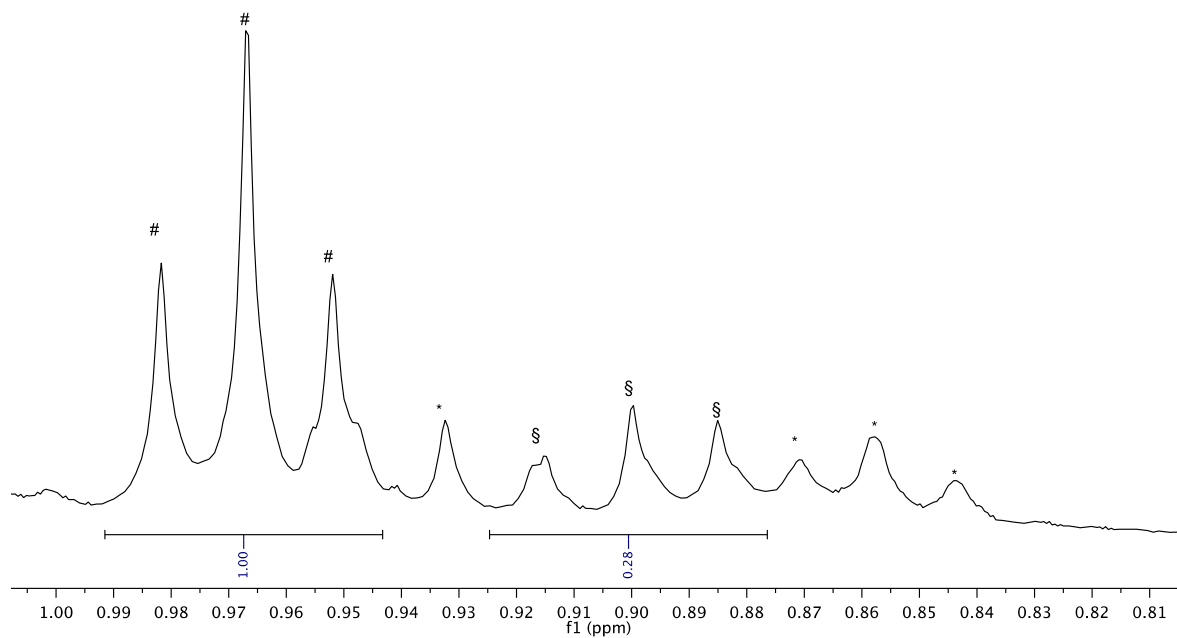

**Figure S24.** Determination of enantiomeric excess by using <sup>1</sup>H NMR spectroscopy. Analysis of products from hydrogenation of tiglic acid using  $[(\mu\text{-H})_2\text{Ru}_3(\mu_3\text{-S})(\text{CO})_7(\mu\text{-1,2-1a})]$  **4**.

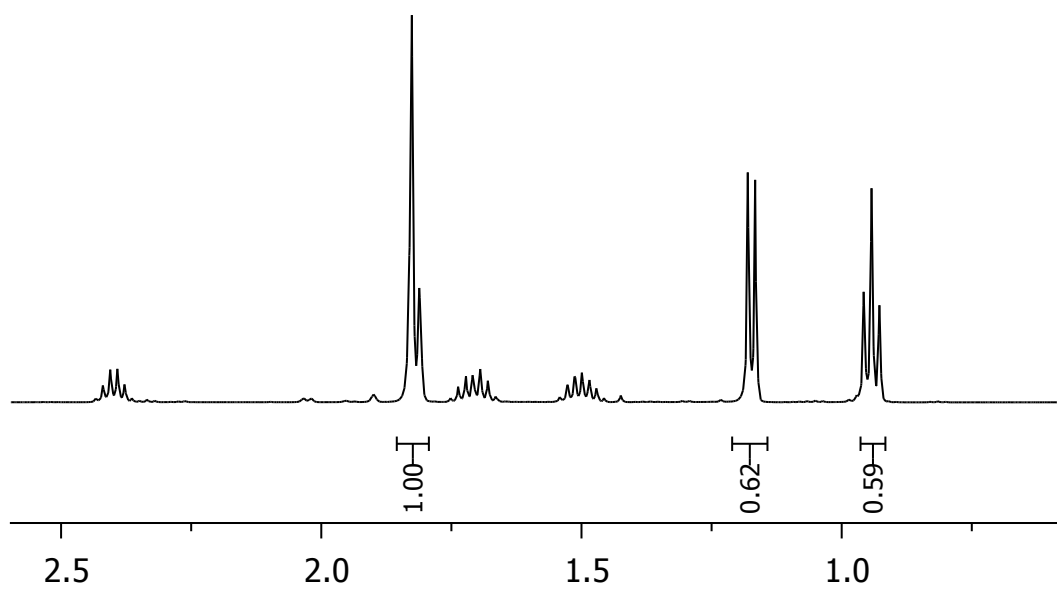

**Figure S25.** Determination of catalytic asymmetric hydrogenation conversion percentage by using  $^1\text{H}$  NMR spectroscopy. Analysis of products from hydrogenation of tiglic acid using  $[(\mu\text{-H})_2\text{Ru}_3(\mu_3\text{-S})(\text{CO})_7(\mu\text{-S,S-1b})]$  **5**.

# = *S,S*  
§ = *R,S*  
\* = Impurity (unreacted hydrogenated Product)

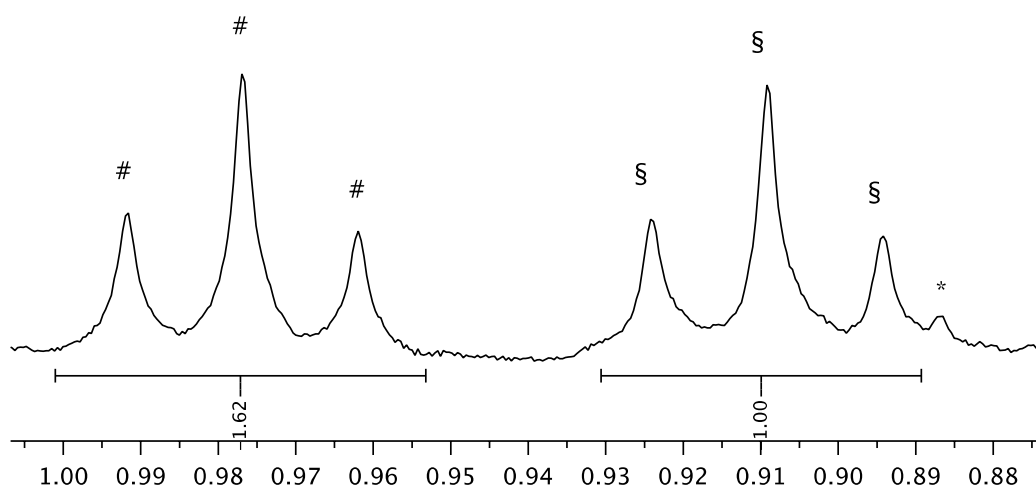

**Figure S26.** Determination of enantiomeric excess by using <sup>1</sup>H NMR spectroscopy. Analysis of products from hydrogenation of tiglic acid using  $[(\mu\text{-H})_2\text{Ru}_3(\mu_3\text{-S})(\text{CO})_7(\mu\text{-S,S-1b})]$  **5**.

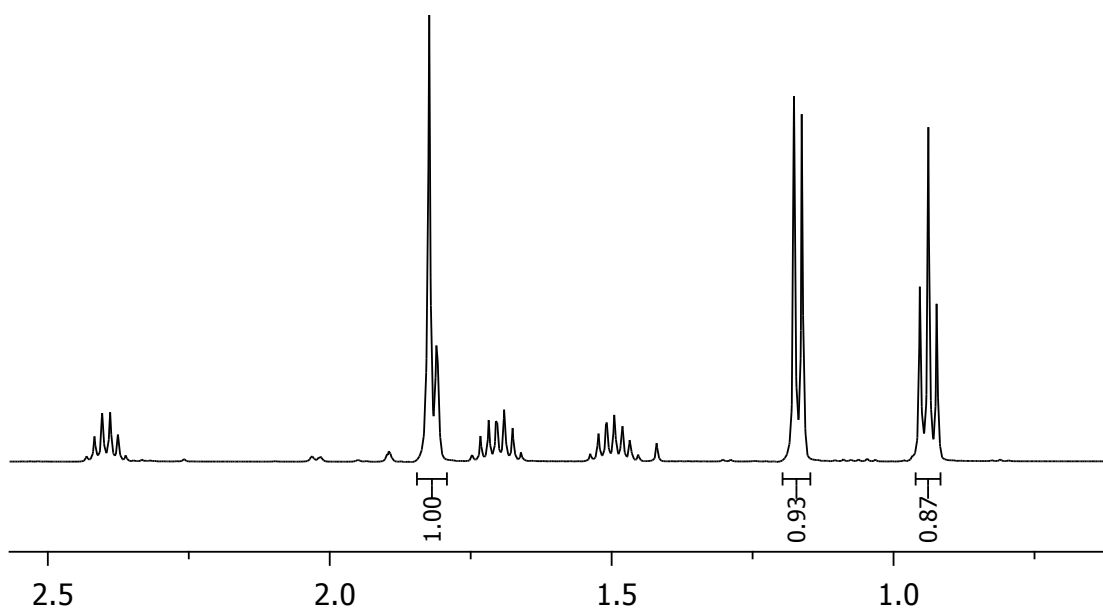

**Figure S27.** Determination of catalytic asymmetric hydrogenation conversion percentage by using <sup>1</sup>H NMR spectroscopy. Analysis of products from hydrogenation of tiglic acid using  $[(\mu\text{-H})_2\text{Ru}_3(\mu_3\text{-S})(\text{CO})_7(\mu\text{-S,S-1b})]$  **6**.

# = *S,S*  
§ = *R,S*  
\* = Impurity (unreacted hydrogenated product)

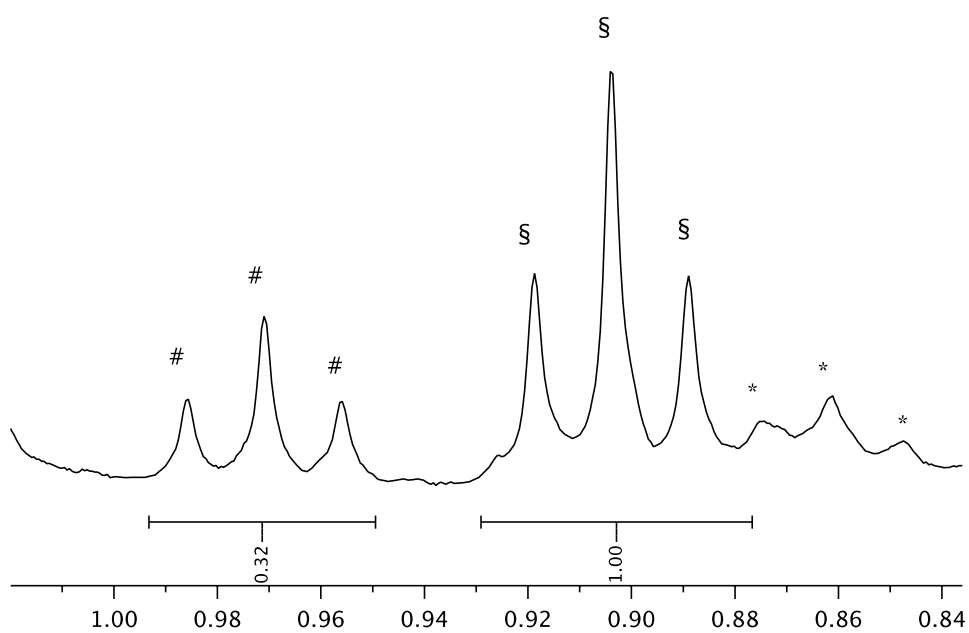

**Figure S28.** Determination of enantiomeric excess by using  $^1\text{H}$  NMR spectroscopy. Analysis of products from hydrogenation of tiglic acid using  $[(\mu\text{-H})_2\text{Ru}_3(\mu_3\text{-S})(\text{CO})_7(\mu\text{-S,S-1b})]$  **6**.

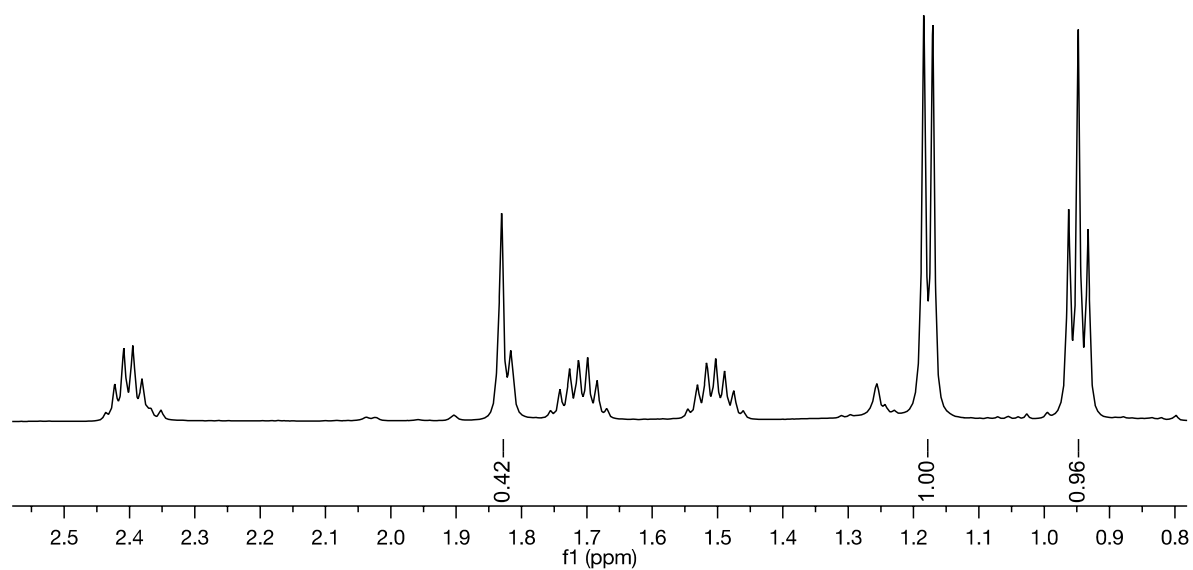

**Figure S29.** Determination of catalytic asymmetric hydrogenation conversion percentage by using <sup>1</sup>H NMR spectroscopy. Analysis of products from hydrogenation of tiglic acid using  $[(\mu\text{-H})_2\text{Ru}_3(\mu_3\text{-S})(\text{CO})_7(\mu\text{-1,2-1c})]$  **7**.

# = *S,S*  
§ = *R,S*  
\* = Impurity (unreacted hydrogenated product)

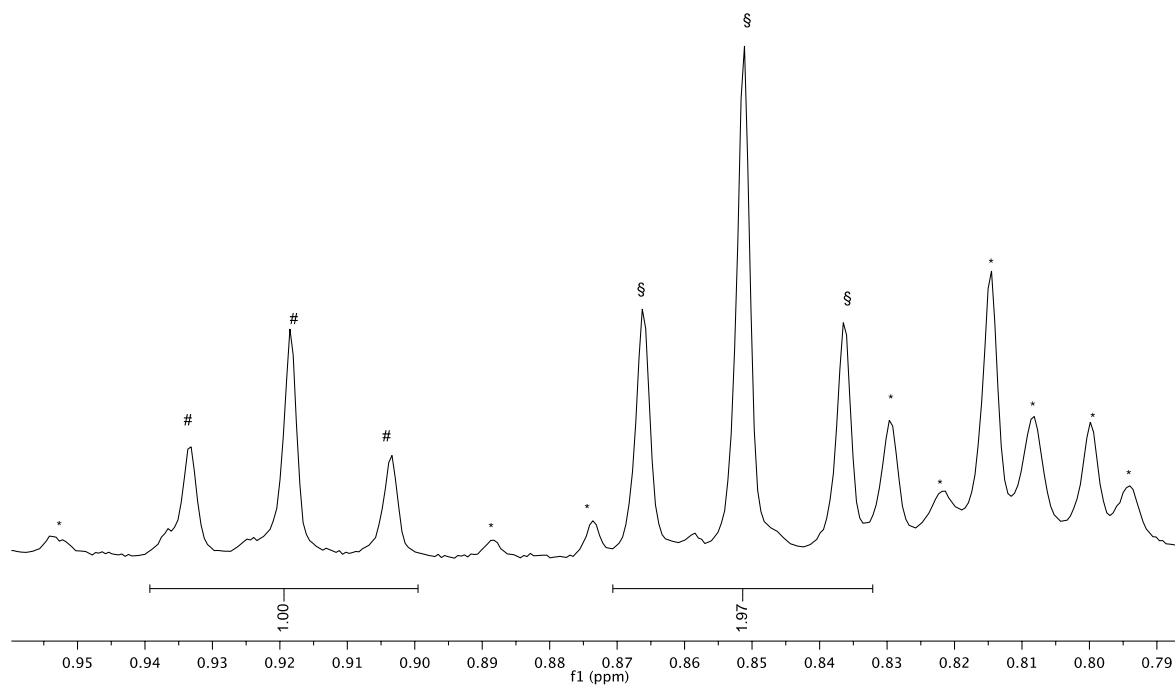

**Figure S30.** Determination of enantiomeric excess by using <sup>1</sup>H NMR spectroscopy. Analysis of products from hydrogenation of tiglic acid using  $[(\mu\text{-H})_2\text{Ru}_3(\mu_3\text{-S})(\text{CO})_7(\mu\text{-1,2-1c})]$  **7**.

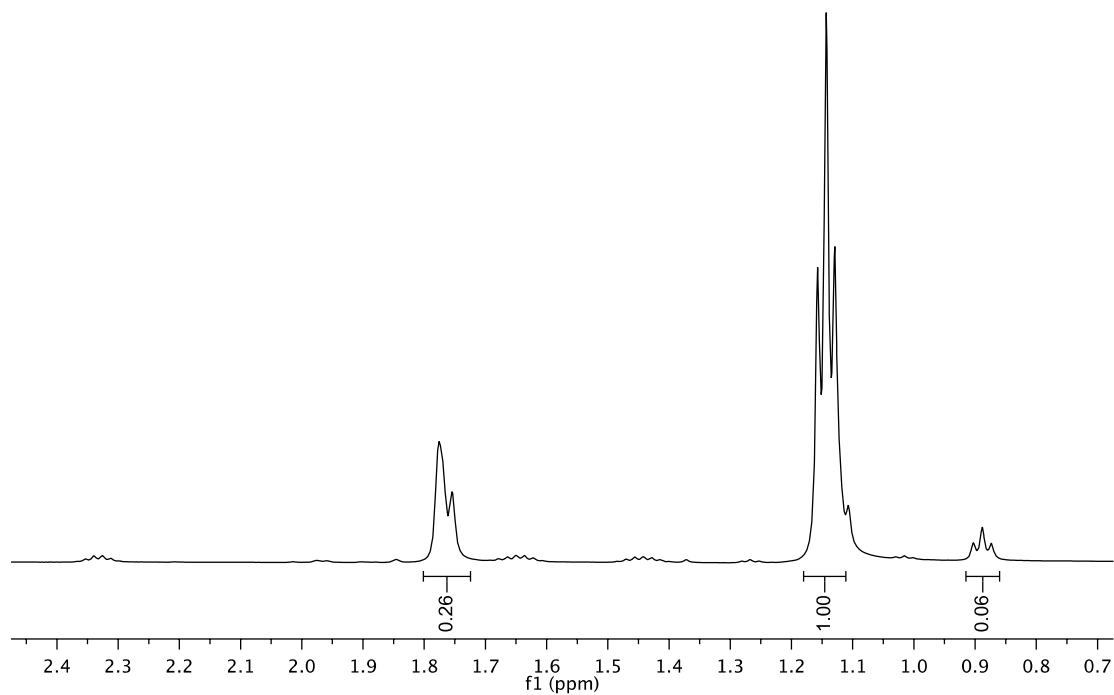

**Figure S31.** Determination of catalytic asymmetric hydrogenation conversion percentage by using <sup>1</sup>H NMR spectroscopy. Analysis of products from hydrogenation of tiglic acid using  $[(\mu\text{-H})_2\text{Ru}_3(\mu_3\text{-S})(\text{CO})_7(\mu\text{-1,2-1c})]$  **8**.



# = *S,S*  
§ = *R,S*  
\* = Impurity (unreacted hydrogenated product)

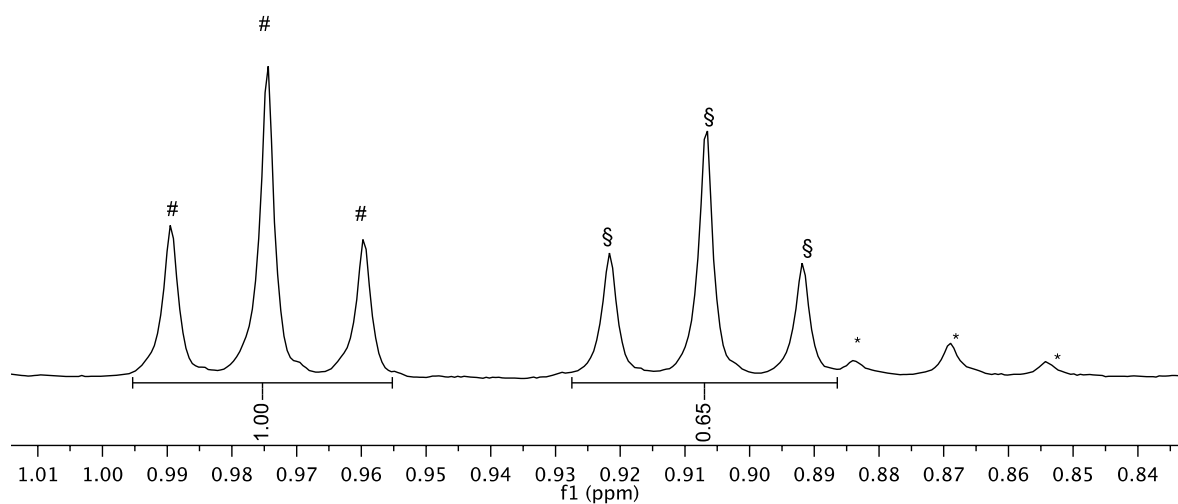

**Figure S32.** Determination of enantiomeric excess by using  $^1\text{H}$  NMR spectroscopy. Analysis of products from hydrogenation of tiglic acid using  $[(\mu\text{-H})_2\text{Ru}_3(\mu_3\text{-S})(\text{CO})_7(\mu\text{-1,2-1c})]$  **8**.

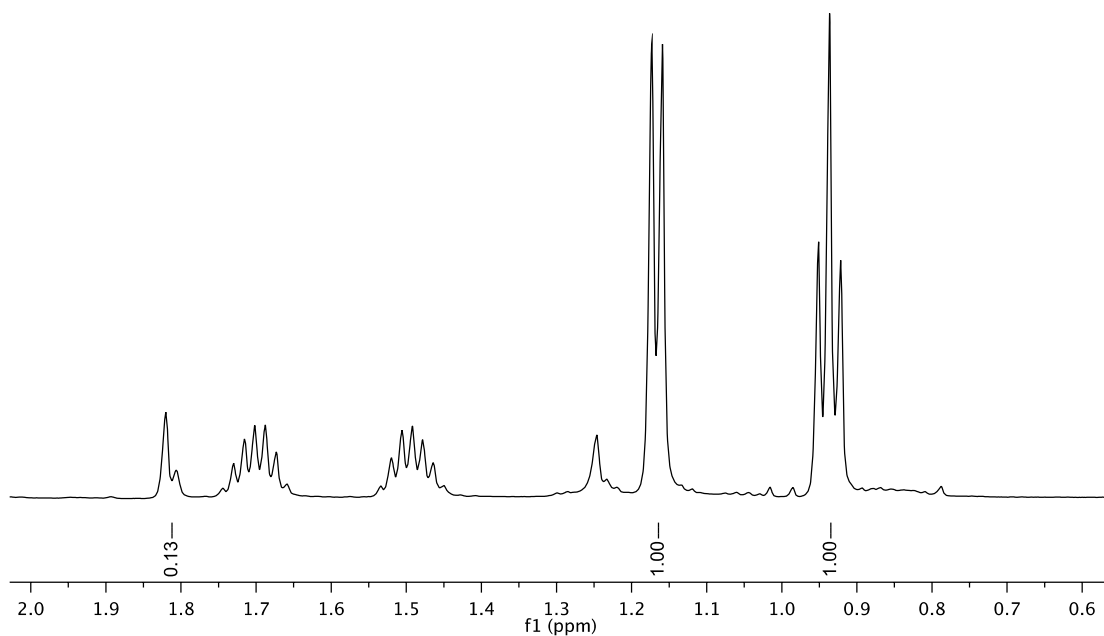

**Figure S33.** Determination of catalytic asymmetric hydrogenation conversion percentage by using <sup>1</sup>H NMR spectroscopy. Analysis of products from hydrogenation of tiglic acid using  $[(\mu\text{-H})_2\text{Ru}_3(\mu_3\text{-S})(\text{CO})_7(\mu\text{-1,2-1d})]$  **9**.

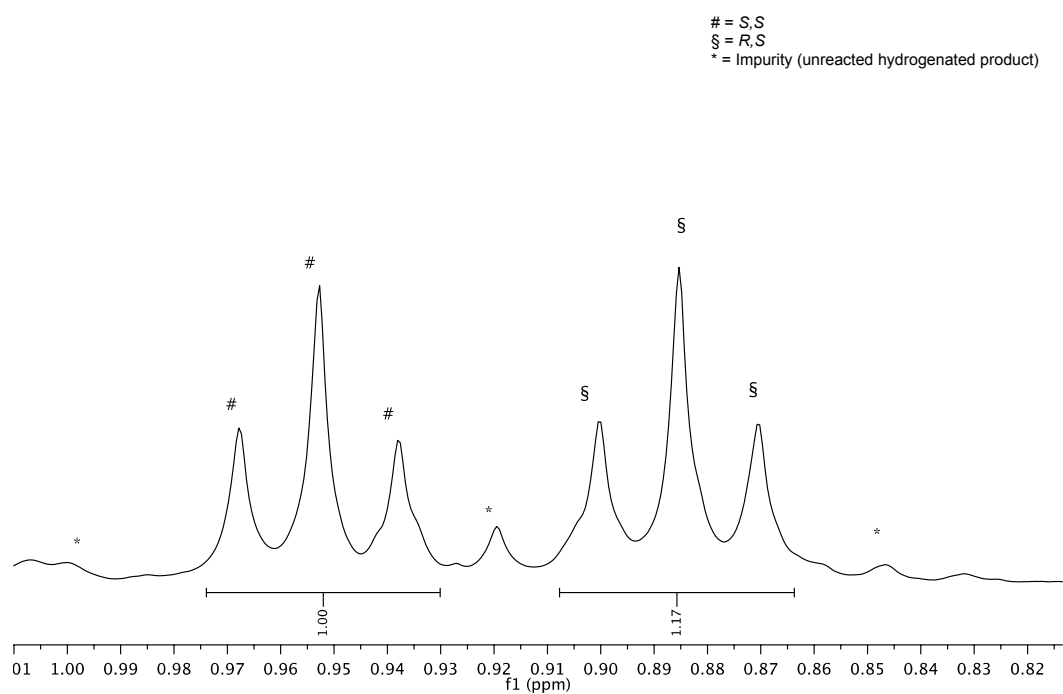

**Figure S34.** Determination of enantiomeric excess by using <sup>1</sup>H NMR spectroscopy. Analysis of products from hydrogenation of tiglic acid using  $[(\mu\text{-H})_2\text{Ru}_3(\mu_3\text{-S})(\text{CO})_7(\mu\text{-1,2-}\mathbf{1d})]$  **9**.

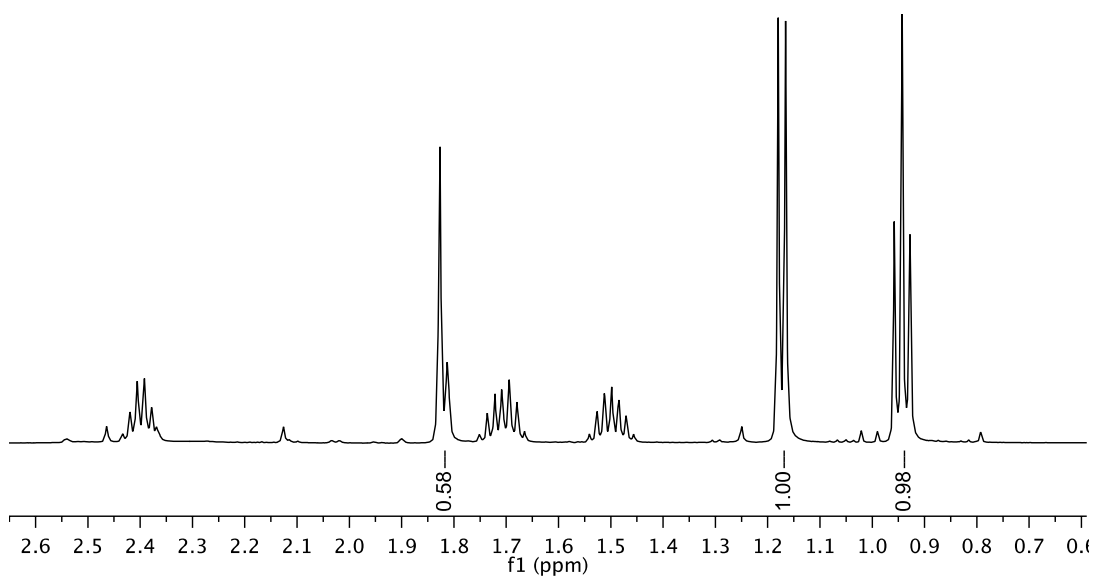

**Figure S35.** Determination of catalytic asymmetric hydrogenation conversion percentage by using <sup>1</sup>H NMR spectroscopy. Analysis of products from hydrogenation of tiglic acid using  $[(\mu\text{-H})_2\text{Ru}_3(\mu_3\text{-S})(\text{CO})_7(\mu\text{-1,2-1d})]$  **10**.

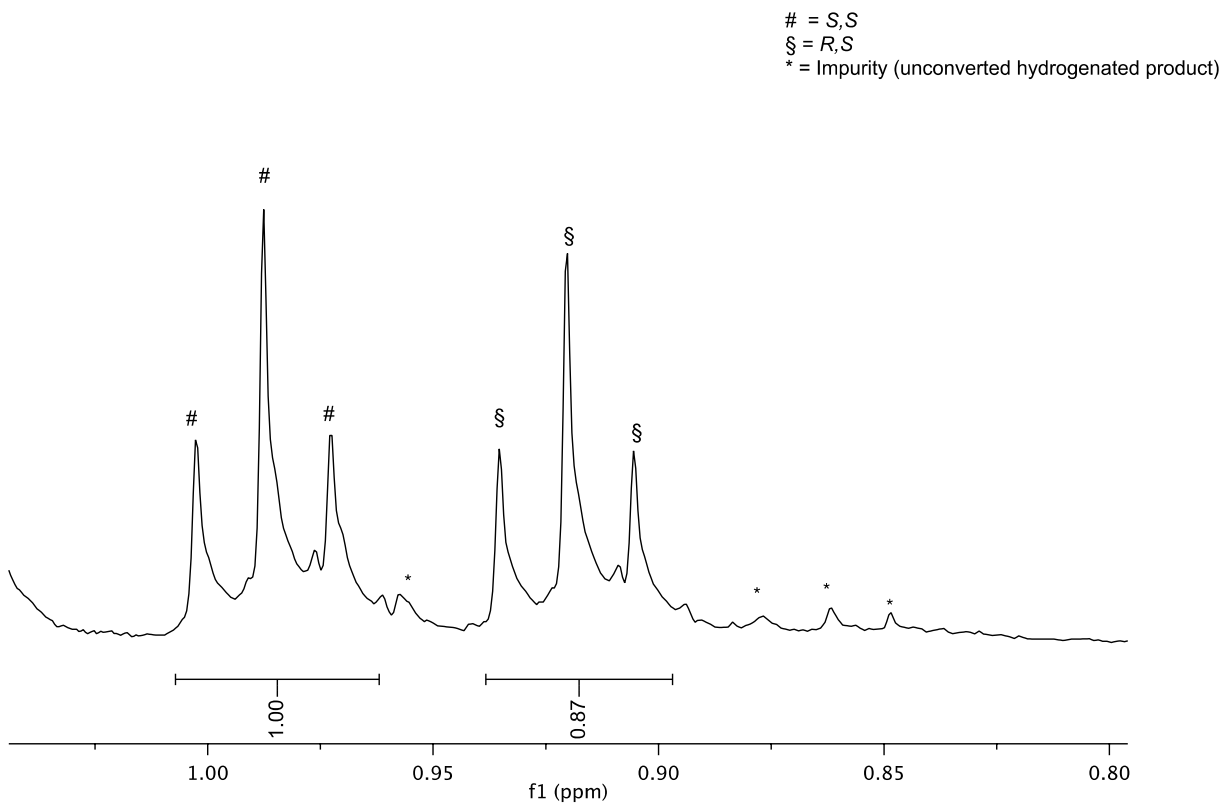

**Figure S36.** Determination of enantiomeric excess by using  $^1\text{H}$  NMR spectroscopy. Analysis of products from hydrogenation of tiglic acid using  $[(\mu\text{-H})_2\text{Ru}_3(\mu_3\text{-S})(\text{CO})_7(\mu\text{-1,2-1d})]$  **10**.

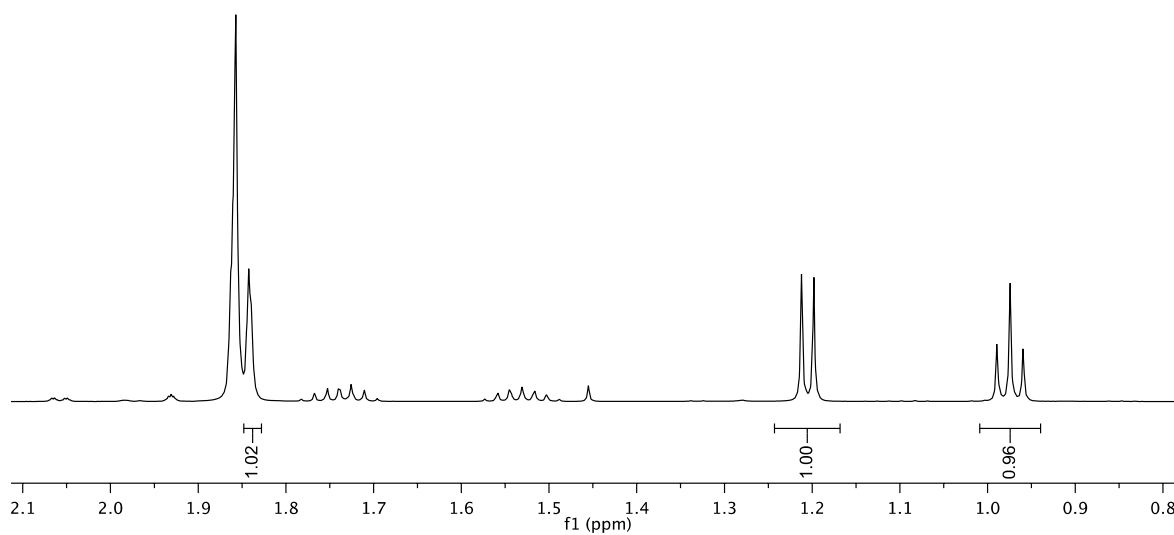

**Figure S37.** Determination of catalytic asymmetric hydrogenation conversion percentage by using  $^1\text{H}$  NMR spectroscopy. Analysis of products from hydrogenation of tiglic acid using  $[(\mu\text{-H})_2\text{Ru}_3(\mu_3\text{-S})(\text{CO})_7(\mu\text{-1,2-1e})]$  **11**.

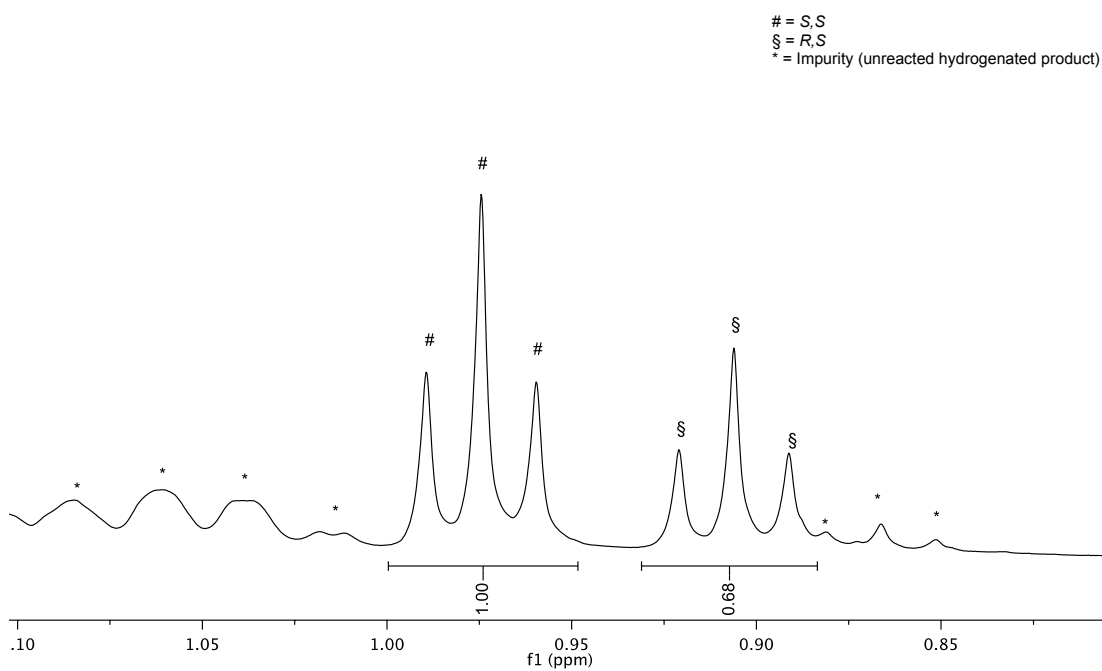

**Figure S38.** Determination of enantiomeric excess by using  $^1\text{H}$  NMR spectroscopy. Analysis of products from hydrogenation of tiglic acid using  $[(\mu\text{-H})_2\text{Ru}_3(\mu_3\text{-S})(\text{CO})_7(\mu\text{-1,2-1e})]$  **11**.

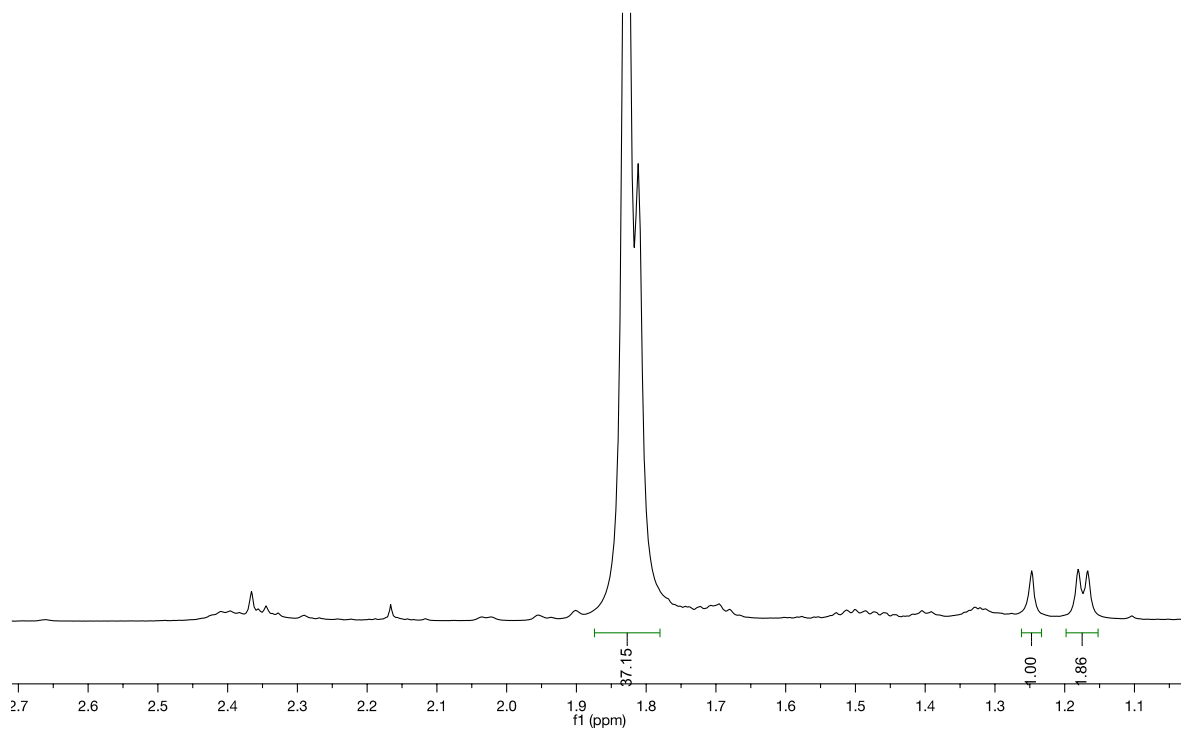

**Figure S39.** Determination of catalytic asymmetric hydrogenation conversion percentage by using <sup>1</sup>H NMR spectroscopy. Analysis of products from hydrogenation of tiglic acid using  $[(\mu\text{-H})_2\text{Ru}_3(\mu_3\text{-S})(\text{CO})_7(\mu\text{-1,2-1e})]$  **12**.



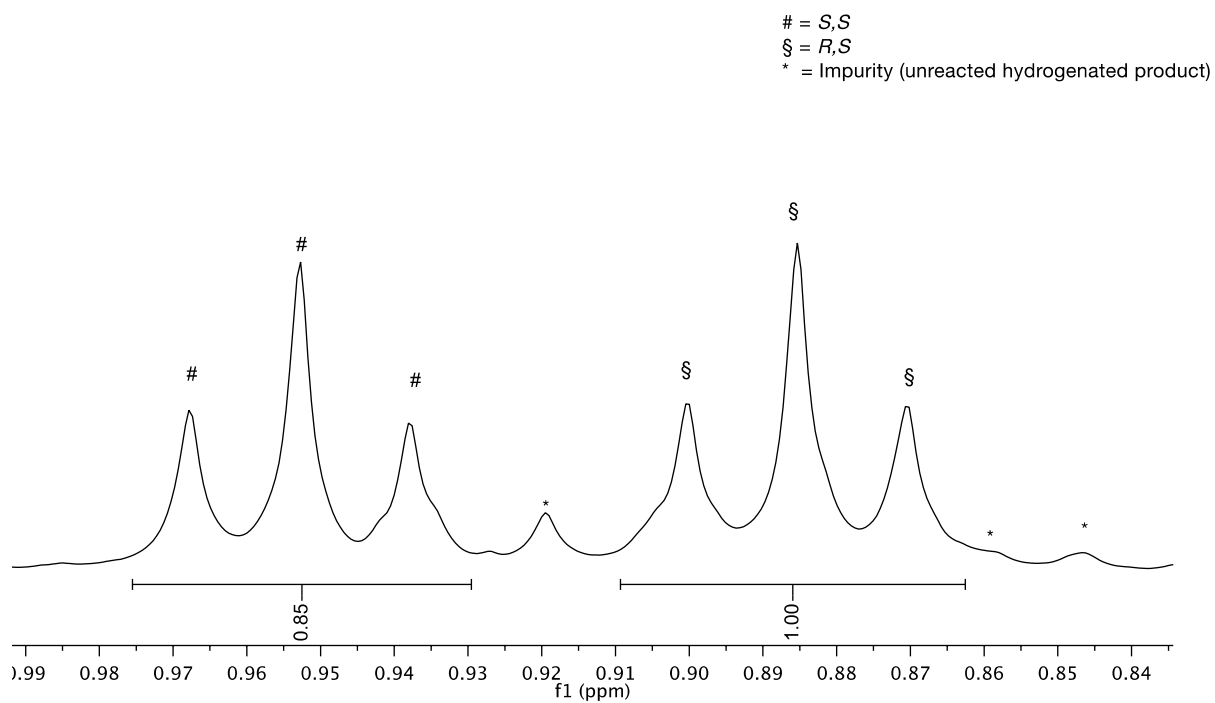

**Figure S40.** Determination of enantiomeric excess by using <sup>1</sup>H NMR spectroscopy. Analysis of products from hydrogenation of tiglic acid using  $[(\mu\text{-H})_2\text{Ru}_3(\mu_3\text{-S})(\text{CO})_7(\mu\text{-1,2-1e})]$  **12**.

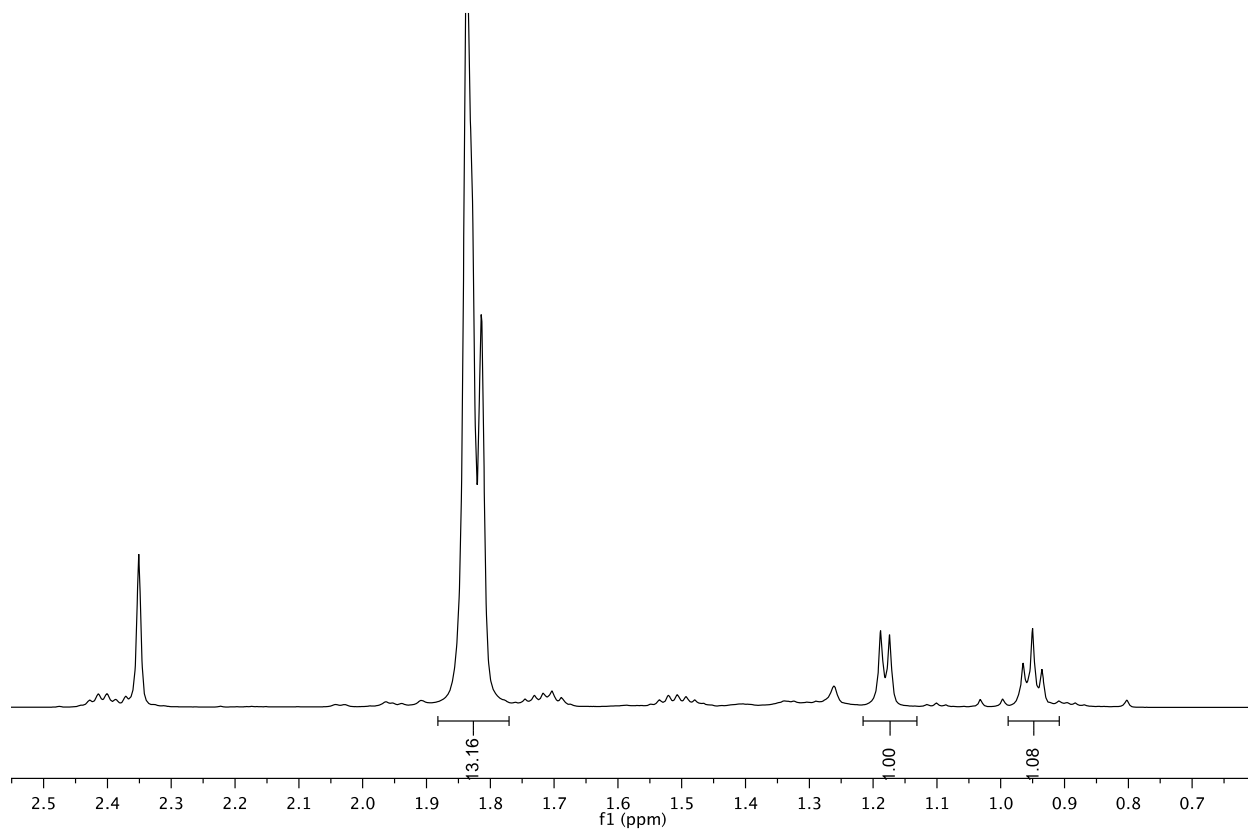

**Figure S41.** Determination of catalytic asymmetric hydrogenation conversion percentage by using <sup>1</sup>H NMR spectroscopy. Analysis of products from hydrogenation of tiglic acid using  $[(\mu\text{-H})_2\text{Ru}_3(\mu_3\text{-S})(\text{CO})_7(\mu\text{-1,2-1f})]$  **13**.

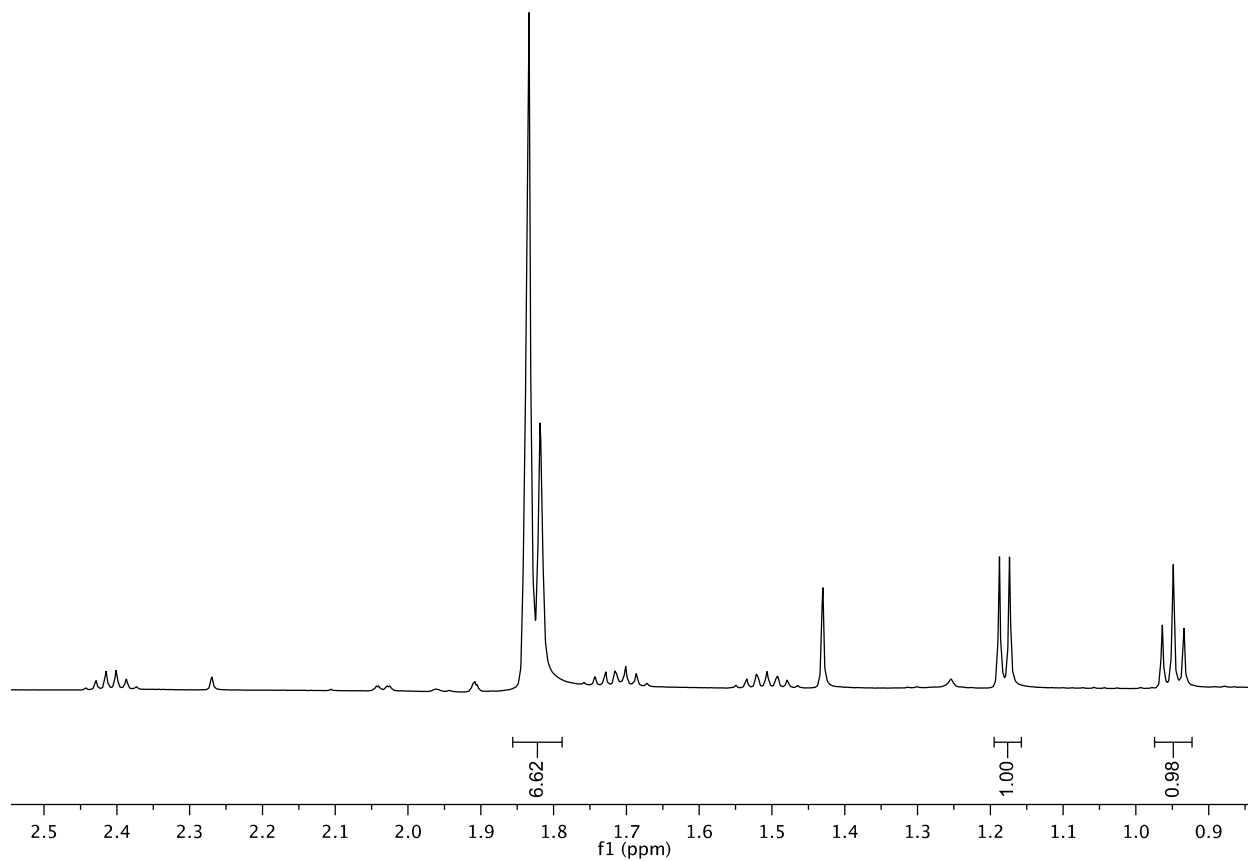

**Figure S42.** Determination of catalytic asymmetric hydrogenation conversion percentage by using <sup>1</sup>H NMR spectroscopy. Analysis of products from hydrogenation of tiglic acid using  $[(\mu\text{-H})_2\text{Ru}_3(\mu_3\text{-S})(\text{CO})_7(\mu\text{-1,2-1f})]$  **14**.

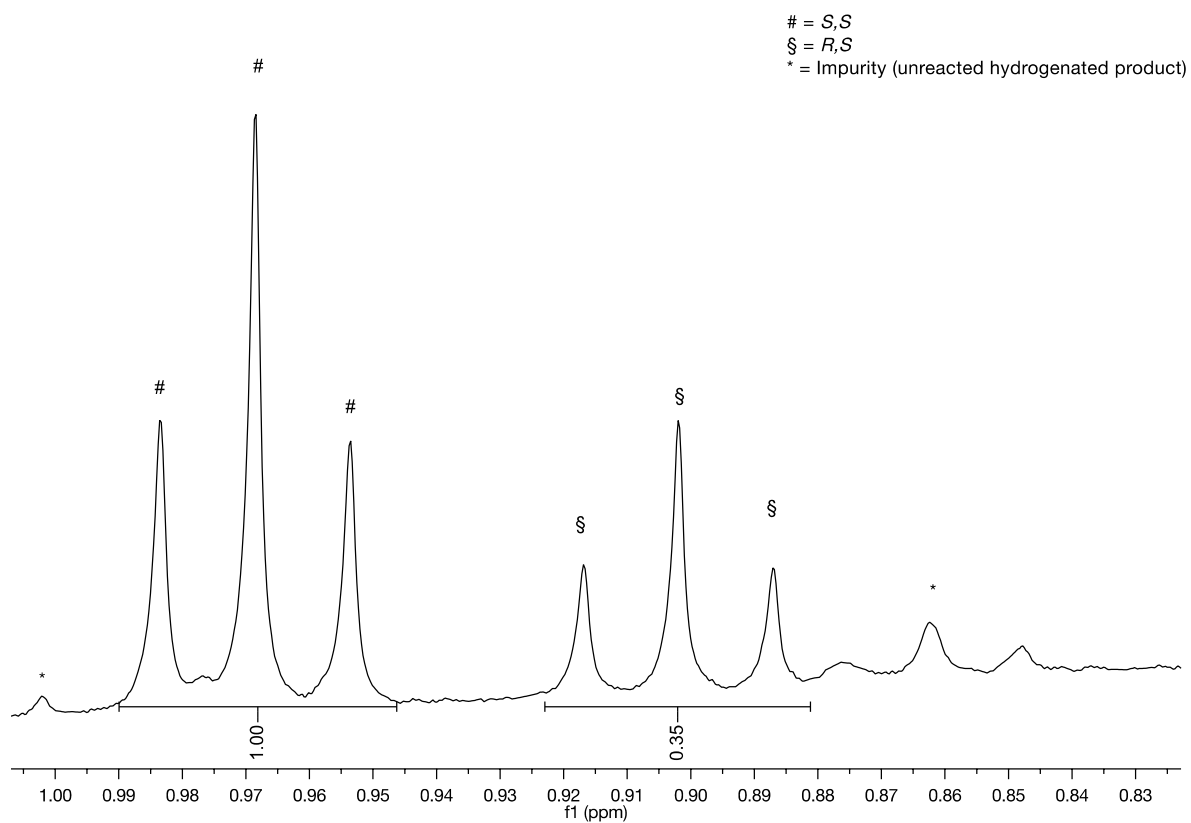

**Figure S43.** Determination of enantiomeric excess by using <sup>1</sup>H NMR spectroscopy. Analysis of products from hydrogenation of tiglic acid using  $[(\mu\text{-H})_2\text{Ru}_3(\mu_3\text{-S})(\text{CO})_7(\mu\text{-1,2-}\mathbf{1f})]$  **14**.

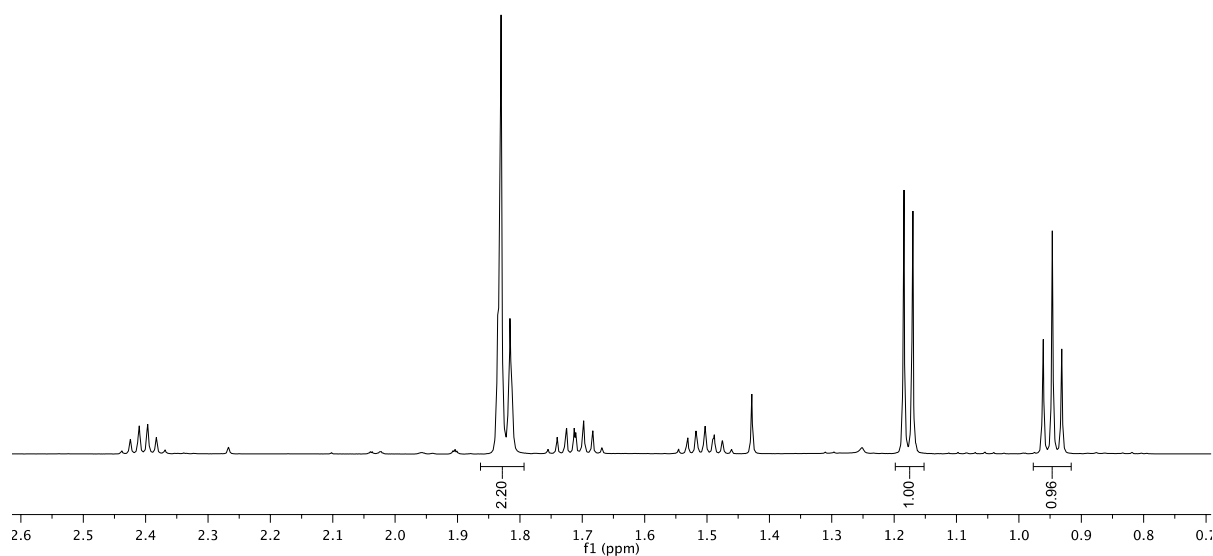

**Figure S44.** Determination of catalytic asymmetric hydrogenation conversion percentage by using  $^1\text{H}$  NMR spectroscopy. Analysis of products from hydrogenation of tiglic acid using  $[(\mu\text{-H})_2\text{Ru}_3(\mu_3\text{-S})(\text{CO})_7(\mu\text{-1,2-1g})]$  **15**.

# = *S,S*  
§ = *R,S*  
\* = Impurity (unreacted hydrogenated product)

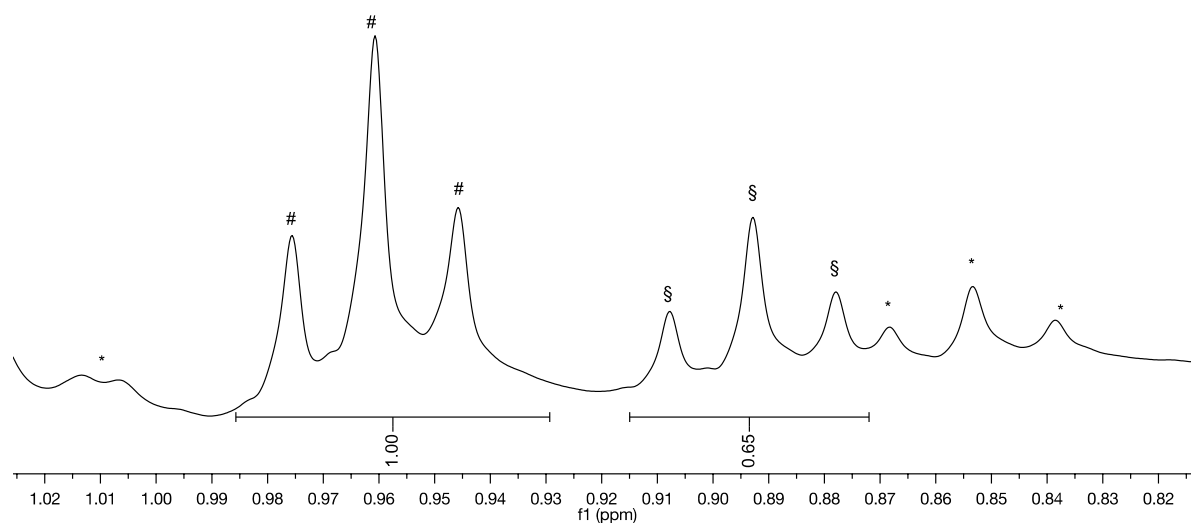

**Figure S45.** Determination of enantiomeric excess by using  $^1\text{H}$  NMR spectroscopy. Analysis of products from hydrogenation of tiglic acid using  $[(\mu\text{-H})_2\text{Ru}_3(\mu_3\text{-S})(\text{CO})_7(\mu\text{-1,2-1g})]$  **15**.

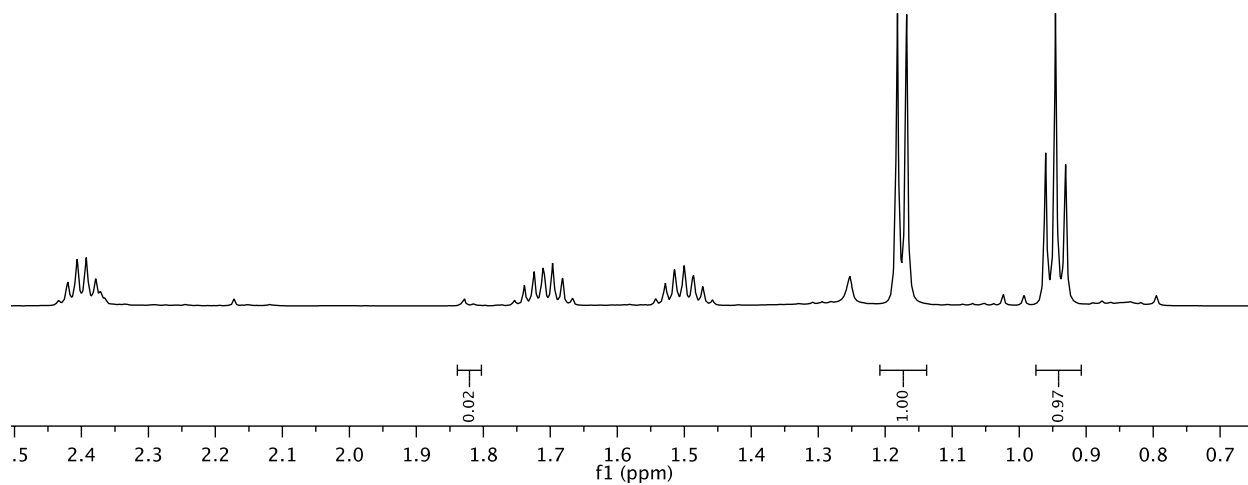

**Figure S46.** Determination of catalytic asymmetric hydrogenation conversion percentage by using  $^1\text{H}$  NMR spectroscopy. Analysis of products from hydrogenation of tiglic acid using  $[(\mu\text{-H})_2\text{Ru}_3(\mu_3\text{-S})(\text{CO})_7(\mu\text{-1,2-1g})]$  **16**.

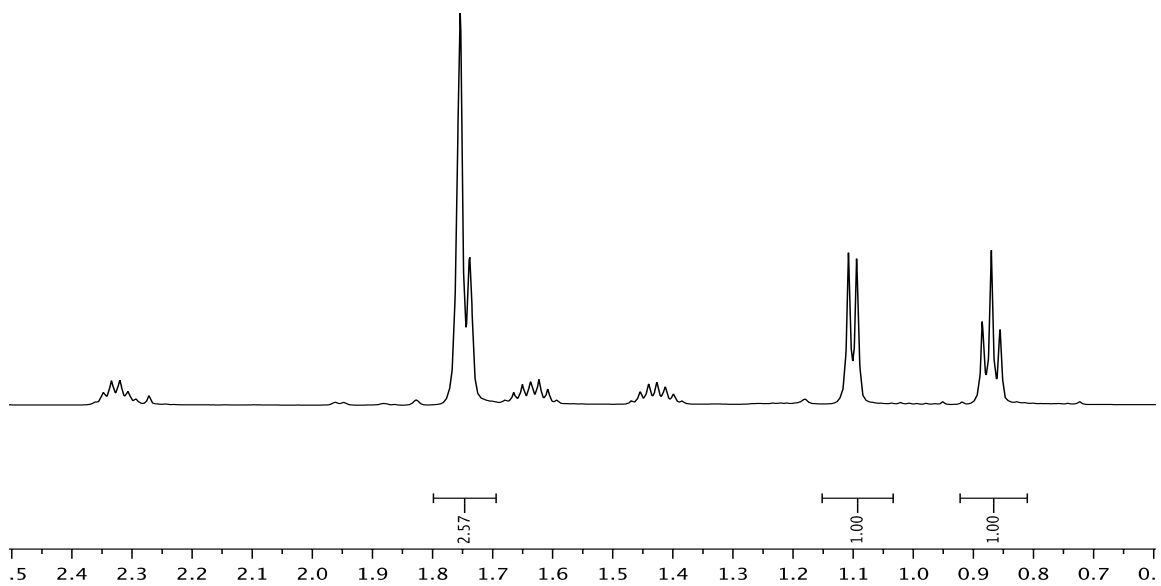

**Figure S47.** Determination of catalytic asymmetric hydrogenation conversion percentage by using <sup>1</sup>H NMR spectroscopy. Analysis of products from hydrogenation of tiglic acid using  $[(\mu\text{-H})_2\text{Ru}_3(\mu_3\text{-S})(\text{CO})_7(\mu\text{-1,2-1h})]$  **17**.



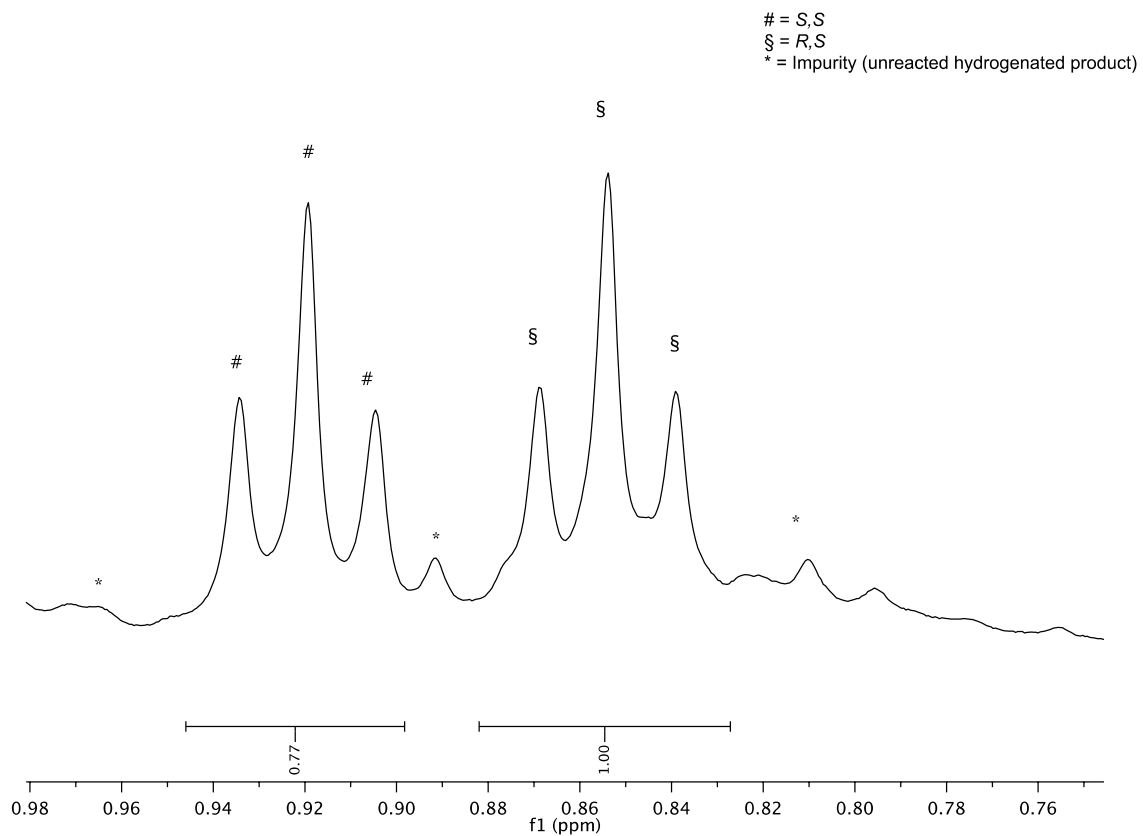

**Figure S48.** Determination of enantioeric excess by using <sup>1</sup>H NMR spectroscopy. Analysis of products from hydrogenation of tiglic acid using  $[(\mu\text{-H})_2\text{Ru}_3(\mu_3\text{-S})(\text{CO})_7(\mu\text{-1,2-1h})]$  **17**.

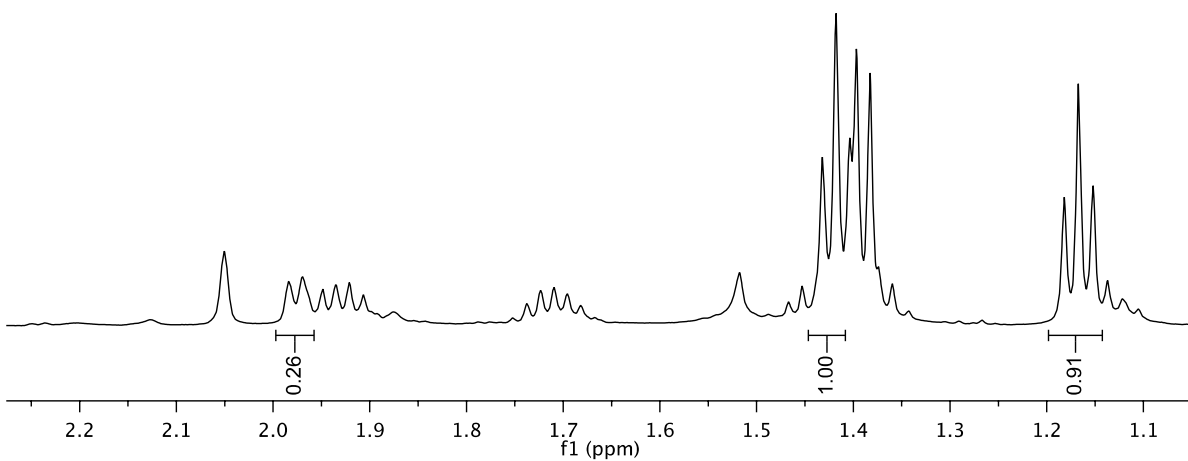

**Figure S49.** Determination of catalytic asymmetric hydrogenation conversion percentage by using <sup>1</sup>H NMR spectroscopy. Analysis of products from hydrogenation of tiglic acid using  $[(\mu\text{-H})_2\text{Ru}_3(\mu_3\text{-S})(\text{CO})_7(\mu\text{-1,2-2a})]$  **18**.

# = *S,S*  
§ = *R,S*  
\* = Impurity (unreacted hydrogenated product)

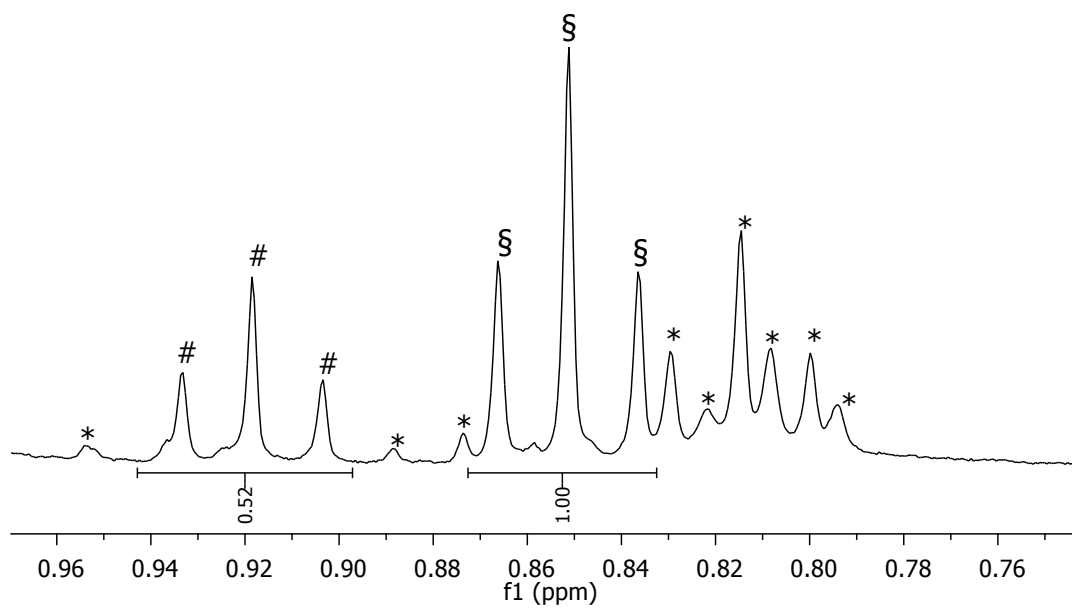

**Figure S50.** Determination of enantiomeric excess by using  $^1\text{H}$  NMR spectroscopy. Analysis of products from hydrogenation of tiglic acid using  $[(\mu\text{-H})_2\text{Ru}_3(\mu_3\text{-S})(\text{CO})_7(\mu\text{-1,2-2a})]$  **18**.

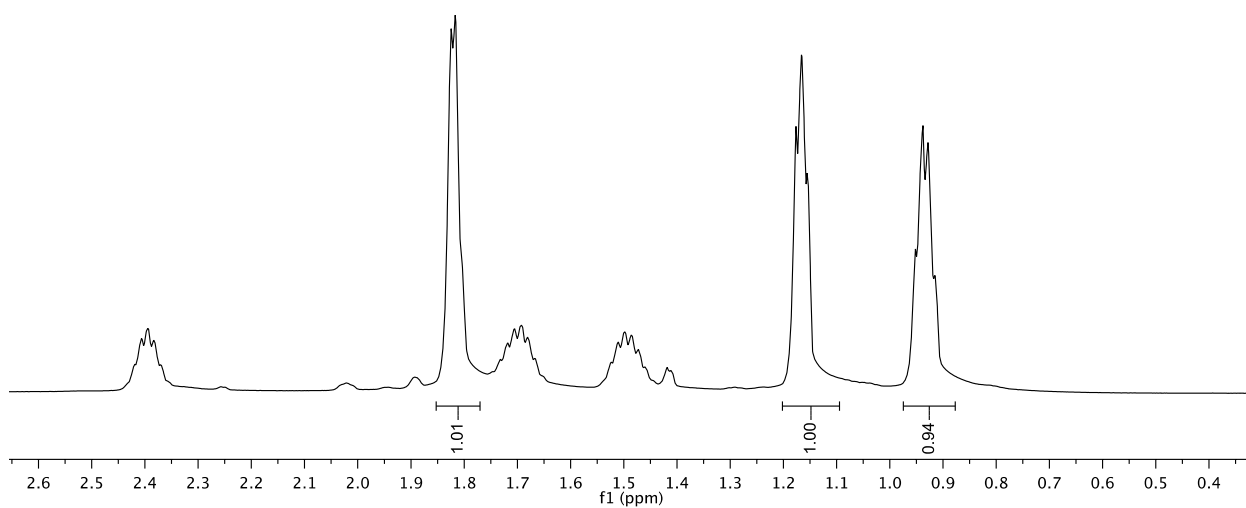

**Figure S51.** Determination of catalytic asymmetric hydrogenation conversion percentage by using <sup>1</sup>H NMR spectroscopy. Analysis of products from hydrogenation of tiglic acid using  $[(\mu\text{-H})_2\text{Ru}_3(\mu_3\text{-S})(\text{CO})_7(\mu\text{-1,2-2a})]$  **19**.

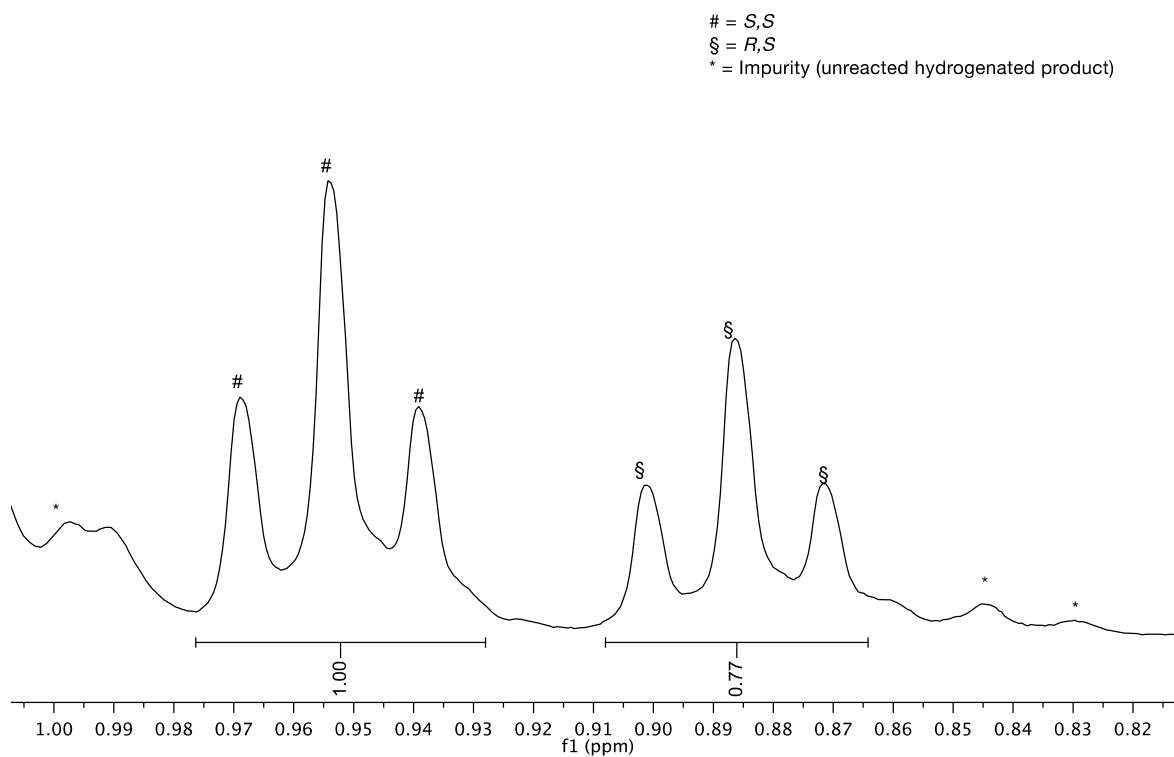

**Figure S52.** Determination of enantiomeric excess by using <sup>1</sup>H NMR spectroscopy. Analysis of products from hydrogenation of tiglic acid using  $[(\mu\text{-H})_2\text{Ru}_3(\mu_3\text{-S})(\text{CO})_7(\mu\text{-1,2-2a})]$  **19**.

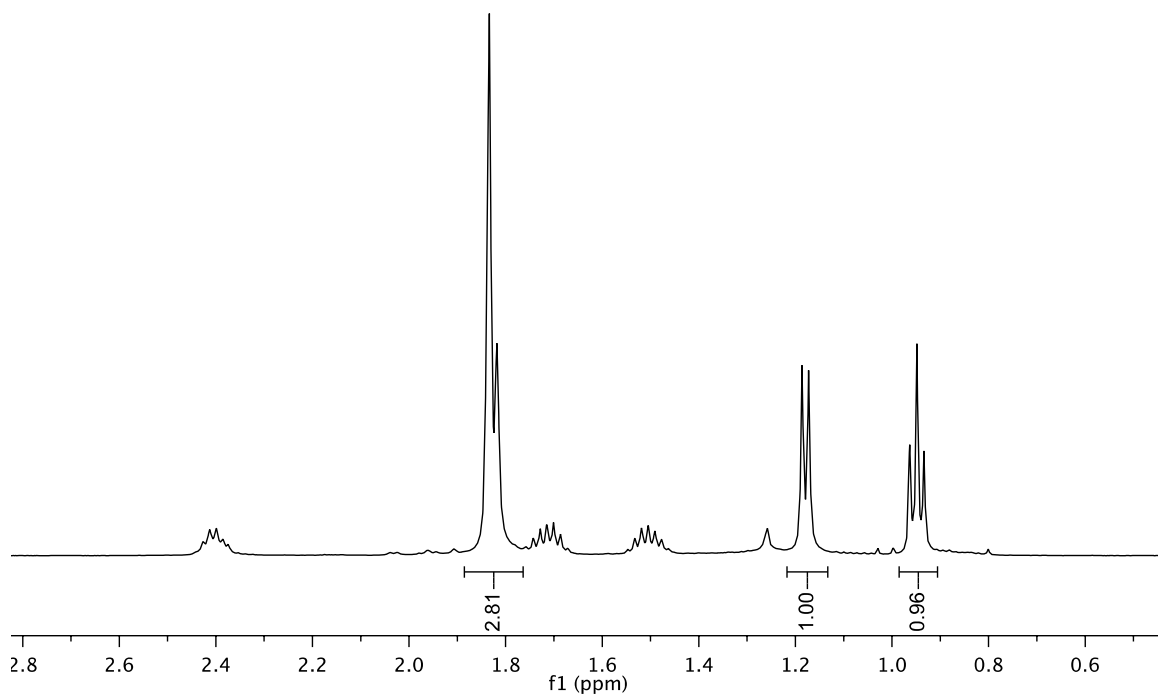

**Figure S53.** Determination of catalytic asymmetric hydrogenation conversion percentage by using <sup>1</sup>H NMR spectroscopy. Analysis of products from hydrogenation of tiglic acid using  $[(\mu\text{-H})_2\text{Ru}_3(\mu_3\text{-S})(\text{CO})_7(\mu\text{-1,2-2b})]$  **20**.

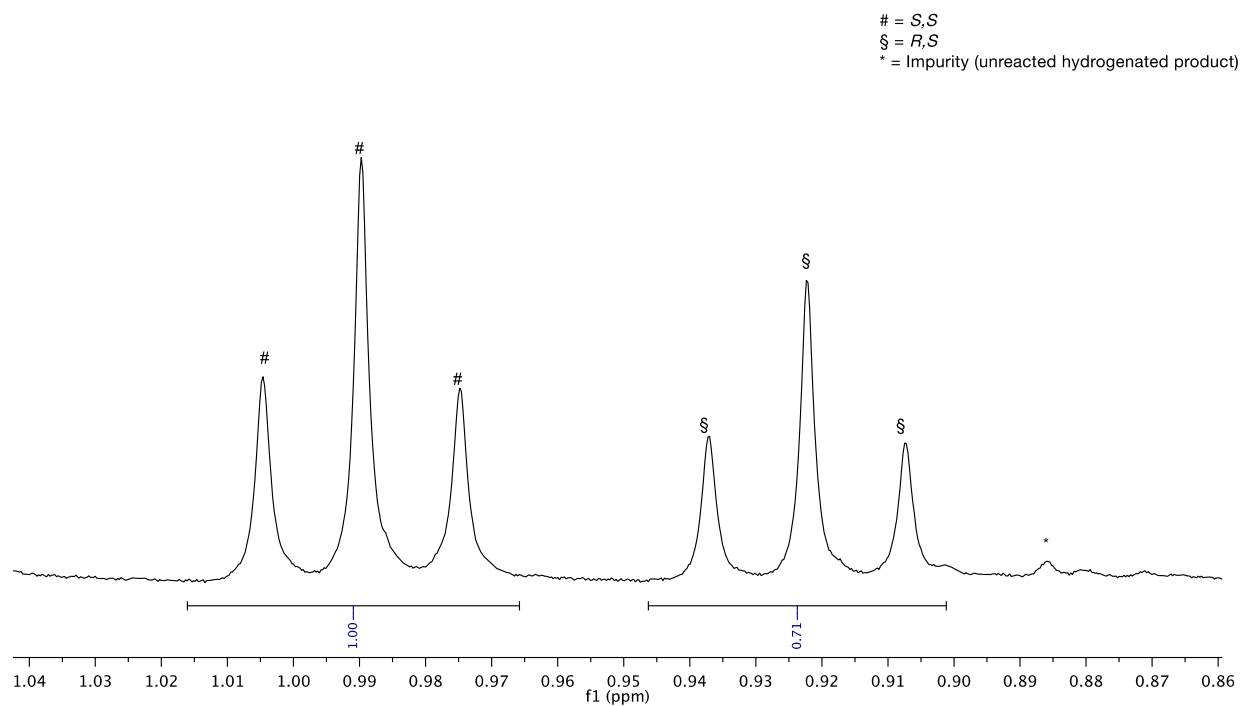

**Figure S54.** Determination of enantiomeric excess by using <sup>1</sup>H NMR spectroscopy. Analysis of products from hydrogenation of tiglic acid using  $[(\mu\text{-H})_2\text{Ru}_3(\mu_3\text{-S})(\text{CO})_7(\mu\text{-1,2-2b})]$  **20**.

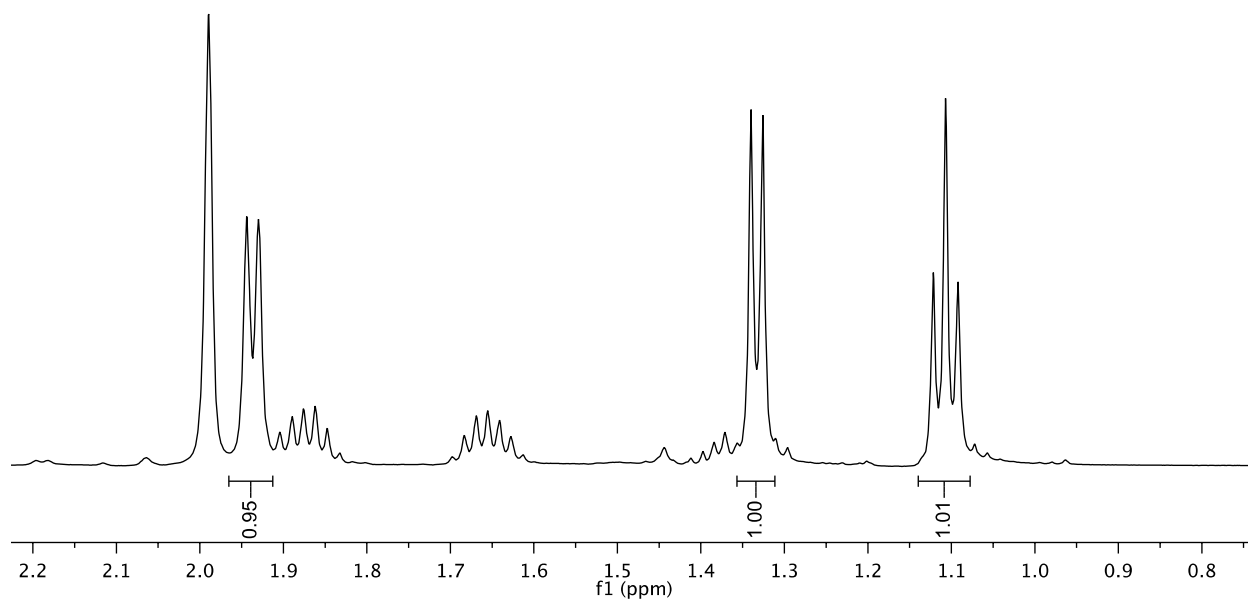

**Figure S55.** Determination of catalytic asymmetric hydrogenation conversion percentage by using <sup>1</sup>H NMR spectroscopy. Analysis of products from hydrogenation of tiglic acid using  $[(\mu\text{-H})_2\text{Ru}_3(\mu_3\text{-S})(\text{CO})_7(\mu\text{-1,2-2c})]$  **21**.



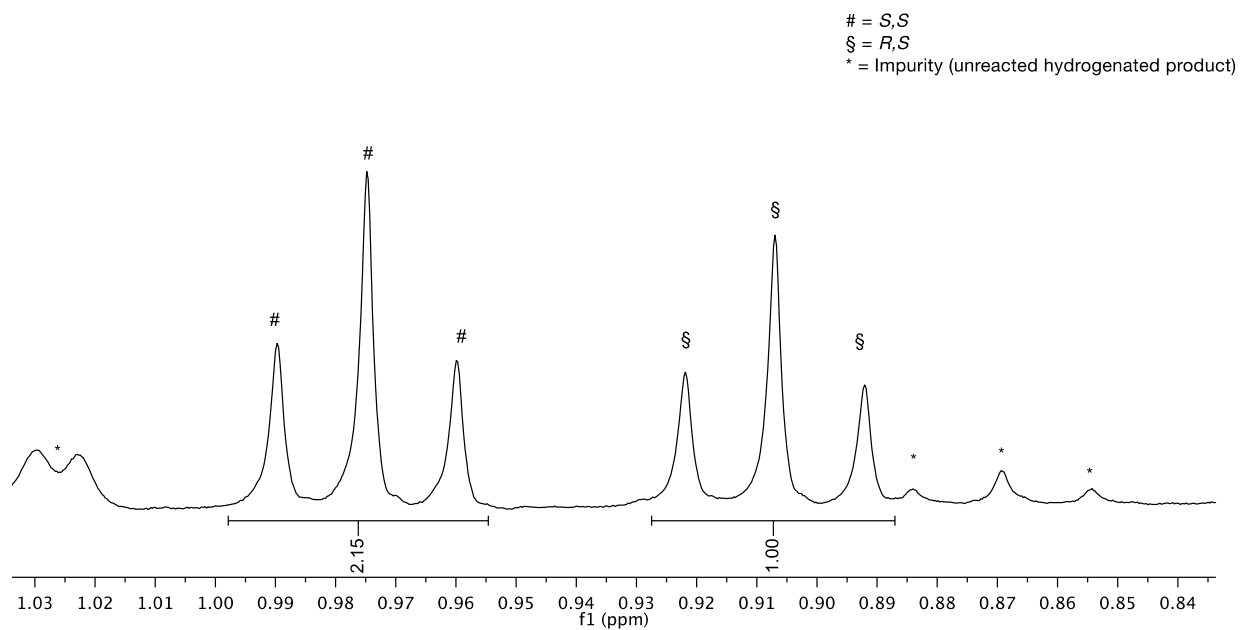

**Figure S56.** Determination of enantiomeric excess by using <sup>1</sup>H NMR spectroscopy. Analysis of products from hydrogenation of tiglic acid using  $[(\mu\text{-H})_2\text{Ru}_3(\mu_3\text{-S})(\text{CO})_7(\mu\text{-1,2-2c})]$  **21**.

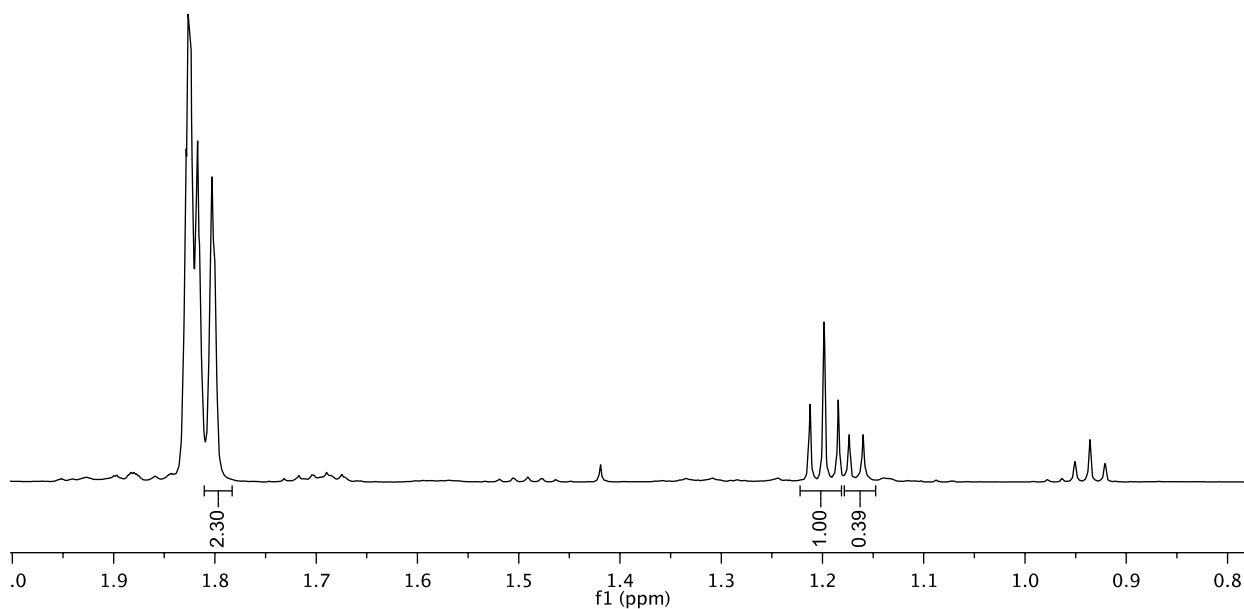

**Figure S57.** Determination of catalytic asymmetric hydrogenation conversion percentage by using <sup>1</sup>H NMR spectroscopy. Analysis of products from hydrogenation of tiglic acid using  $[(\mu\text{-H})_2\text{Ru}_3(\mu_3\text{-S})(\text{CO})_7(\mu\text{-1,2-2d})]$  **22**.

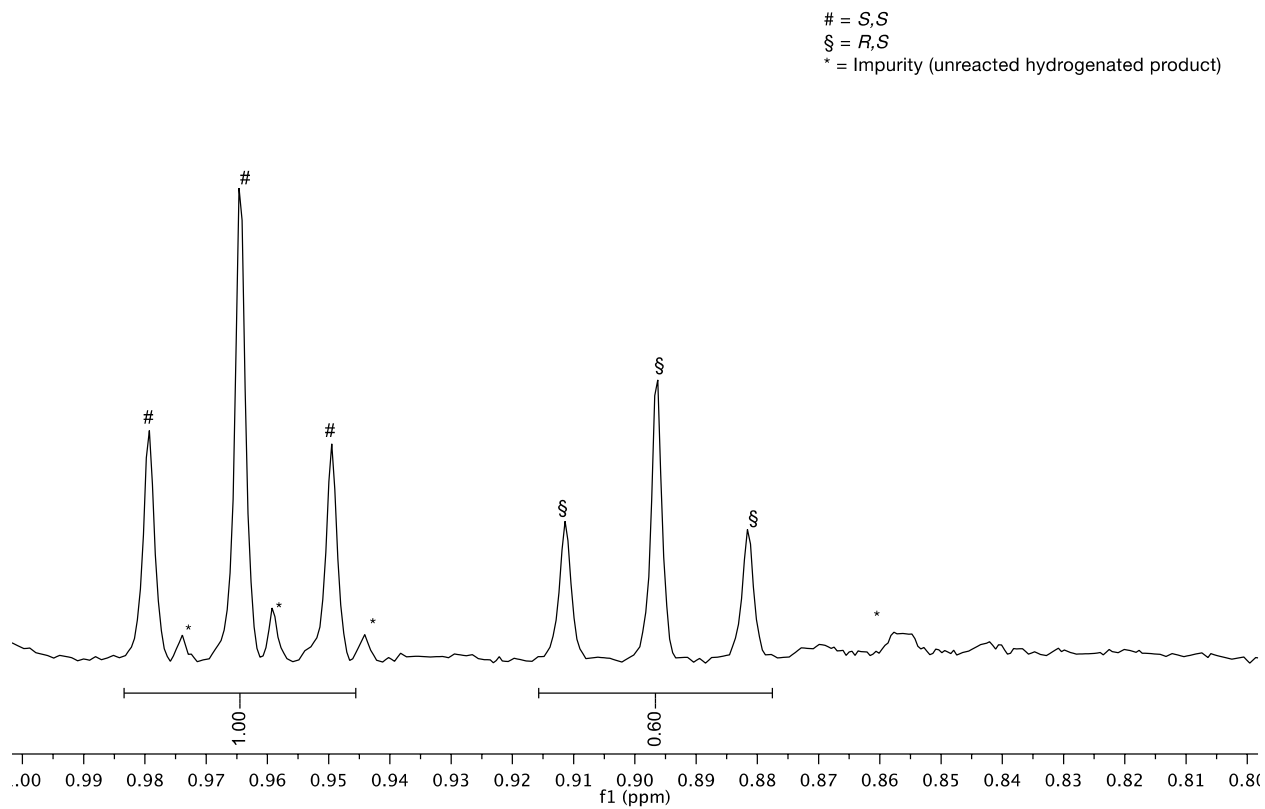

**Figure S58.** Determination of enantiomeric excess by using <sup>1</sup>H NMR spectroscopy. Analysis of products from hydrogenation of tiglic acid using  $[(\mu\text{-H})_2\text{Ru}_3(\mu_3\text{-S})(\text{CO})_7(\mu\text{-1,2-2d})]$  **22**.

## 2. Computational Details

### 4.1. B3LYP geometries and energies for all optimized minima and transition structures (S2-S39)

#### Species A

HF energy = -2294.624983562325

No imaginary frequency

Zero-point correction = 0.711046 (Hartree/Particle)

Thermal correction to Energy = 0.789816

Thermal correction to Enthalpy = 0.790760

Thermal correction to Gibbs Free Energy = 0.582051

Sum of electronic and zero-point Energies = -2293.913937

Sum of electronic and thermal Energies = -2293.835168

Sum of electronic and thermal Enthalpies = -2293.834223

Sum of electronic and thermal Free Energies = -2294.042933

#### Coordinates: A

|    |             |             |             |
|----|-------------|-------------|-------------|
| Ru | 13.72080000 | 10.34560000 | 18.30760000 |
| H  | 12.16870000 | 10.61720000 | 17.33010000 |
| Ru | 12.06370000 | 9.50820000  | 15.93120000 |
| H  | 13.30050000 | 10.54100000 | 15.16260000 |
| Ru | 14.99220000 | 10.11560000 | 15.79950000 |
| Fe | 8.86720000  | 13.68250000 | 18.93140000 |
| S  | 13.88500000 | 8.33640000  | 16.98990000 |
| P  | 12.37760000 | 9.94550000  | 20.18590000 |
| P  | 10.29840000 | 10.92050000 | 15.19410000 |
| F  | 6.66330000  | 6.60450000  | 14.97810000 |
| F  | 5.47710000  | 6.95580000  | 13.26370000 |
| F  | 5.37440000  | 8.28430000  | 14.90360000 |
| F  | 9.09420000  | 8.19450000  | 9.67890000  |
| F  | 7.79400000  | 9.86600000  | 9.58490000  |
| F  | 9.87180000  | 10.15430000 | 9.84200000  |
| F  | 7.91960000  | 13.71810000 | 10.97480000 |
| F  | 7.11470000  | 14.75890000 | 12.63470000 |
| F  | 8.38000000  | 15.76010000 | 11.26940000 |
| F  | 12.73100000 | 16.68140000 | 13.40640000 |
| F  | 13.29820000 | 15.54160000 | 15.08840000 |
| F  | 13.91640000 | 14.94900000 | 13.14520000 |
| O  | 16.24630000 | 9.95470000  | 19.93750000 |
| O  | 13.82220000 | 13.38390000 | 18.48710000 |
| O  | 10.01390000 | 7.72200000  | 17.31860000 |
| O  | 12.08040000 | 7.81200000  | 13.39320000 |
| O  | 15.73190000 | 8.90410000  | 13.04060000 |
| O  | 17.77050000 | 9.65600000  | 16.96010000 |
| O  | 15.51710000 | 13.09200000 | 15.28130000 |

|   |             |             |             |
|---|-------------|-------------|-------------|
| C | 15.29090000 | 10.10490000 | 19.30800000 |
| C | 13.77010000 | 12.23040000 | 18.44980000 |
| C | 10.77820000 | 8.41300000  | 16.80930000 |
| C | 12.05980000 | 8.44560000  | 14.35040000 |
| C | 15.43400000 | 9.33250000  | 14.06440000 |
| C | 16.71580000 | 9.83480000  | 16.53820000 |
| C | 15.32830000 | 11.97370000 | 15.47620000 |
| C | 12.44950000 | 11.22270000 | 21.53830000 |
| C | 13.64370000 | 11.92310000 | 21.73590000 |
| C | 13.75530000 | 12.84110000 | 22.78750000 |
| C | 12.67160000 | 13.06170000 | 23.64260000 |
| C | 11.47690000 | 12.36310000 | 23.44360000 |
| C | 11.36430000 | 11.44240000 | 22.39510000 |
| C | 12.90600000 | 8.47770000  | 21.19750000 |
| C | 12.75120000 | 8.43020000  | 22.58770000 |
| C | 13.16550000 | 7.29850000  | 23.29960000 |
| C | 13.73440000 | 6.21190000  | 22.62810000 |
| C | 13.89310000 | 6.26090000  | 21.24020000 |
| C | 13.48410000 | 7.39400000  | 20.52670000 |
| C | 10.53260000 | 9.68880000  | 20.07860000 |
| C | 10.04930000 | 8.47040000  | 20.58340000 |
| C | 8.68410000  | 8.17810000  | 20.60900000 |
| C | 7.76920000  | 9.10810000  | 20.10930000 |
| C | 8.23640000  | 10.30930000 | 19.58500000 |
| C | 9.61480000  | 10.62570000 | 19.56230000 |
| C | 9.92680000  | 11.92620000 | 18.94840000 |
| C | 9.55180000  | 12.31180000 | 17.55450000 |
| C | 10.09750000 | 13.65860000 | 17.31130000 |
| C | 10.80310000 | 14.10430000 | 18.51780000 |
| C | 10.69520000 | 13.04280000 | 19.52600000 |
| C | 6.82890000  | 13.50550000 | 18.94690000 |
| C | 7.24630000  | 14.77860000 | 18.34490000 |
| C | 8.04940000  | 15.50560000 | 19.33760000 |
| C | 8.12640000  | 14.68050000 | 20.55290000 |
| C | 7.37700000  | 13.44270000 | 20.30920000 |
| C | 8.96730000  | 11.40600000 | 16.52260000 |
| C | 7.70380000  | 12.01440000 | 15.91760000 |
| C | 9.21470000  | 9.95070000  | 14.01370000 |
| C | 8.18920000  | 9.13560000  | 14.49780000 |
| C | 7.36850000  | 8.42740000  | 13.60180000 |
| C | 6.25000000  | 7.58520000  | 14.15960000 |
| C | 7.58690000  | 8.51280000  | 12.22310000 |
| C | 8.63970000  | 9.30900000  | 11.74470000 |
| C | 8.85450000  | 9.38310000  | 10.25330000 |
| C | 9.45810000  | 10.01670000 | 12.63500000 |
| C | 10.42350000 | 12.51830000 | 14.24210000 |

|   |             |             |             |
|---|-------------|-------------|-------------|
| C | 9.35200000  | 12.95040000 | 13.45250000 |
| C | 9.42330000  | 14.17700000 | 12.77370000 |
| C | 8.24970000  | 14.60200000 | 11.93080000 |
| C | 10.56130000 | 14.98470000 | 12.88870000 |
| C | 11.62730000 | 14.55270000 | 13.68750000 |
| C | 12.85840000 | 15.41290000 | 13.82680000 |
| C | 11.56770000 | 13.31340000 | 14.35160000 |
| H | 11.19750000 | 13.05480000 | 20.48510000 |
| H | 10.08580000 | 14.19030000 | 16.37110000 |
| H | 6.92300000  | 12.08160000 | 16.69650000 |
| H | 7.84840000  | 13.05110000 | 15.57760000 |
| H | 7.26280000  | 11.43860000 | 15.09750000 |
| H | 8.68170000  | 10.43350000 | 17.02080000 |
| H | 6.87740000  | 15.18680000 | 17.41650000 |
| H | 6.08120000  | 12.84130000 | 18.54260000 |
| H | 7.11700000  | 12.71070000 | 21.05930000 |
| H | 8.51890000  | 15.00280000 | 21.50560000 |
| H | 8.37060000  | 16.53330000 | 19.25580000 |
| H | 11.44450000 | 14.97420000 | 18.58810000 |
| H | 12.75850000 | 13.77570000 | 24.46180000 |
| H | 14.68930000 | 13.38230000 | 22.93910000 |
| H | 14.51240000 | 11.77510000 | 21.08920000 |
| H | 12.31470000 | 9.25610000  | 23.15400000 |
| H | 13.04710000 | 7.26700000  | 24.38200000 |
| H | 14.05660000 | 5.33190000  | 23.18490000 |
| H | 14.34060000 | 5.41980000  | 20.71030000 |
| H | 13.63250000 | 7.40250000  | 19.43780000 |
| H | 6.70090000  | 8.89250000  | 20.12580000 |
| H | 8.33770000  | 7.22600000  | 21.00950000 |
| H | 7.52440000  | 11.04110000 | 19.18640000 |
| H | 12.42890000 | 12.98620000 | 14.95070000 |
| H | 10.28430000 | 10.61910000 | 12.23540000 |
| H | 7.99820000  | 9.03040000  | 15.57400000 |
| H | 6.95070000  | 7.96540000  | 11.51690000 |
| H | 8.43900000  | 12.34970000 | 13.34120000 |
| H | 10.61720000 | 15.94220000 | 12.35720000 |
| H | 10.71990000 | 7.69320000  | 20.96940000 |
| H | 10.41290000 | 10.91600000 | 22.26950000 |
| H | 10.62960000 | 12.53410000 | 24.10690000 |

---

**Species B**

HF energy = -2181.261546472092

no imaginary frequency

Zero-point correction = 0.703305 (Hartree/Particle)

Thermal correction to Energy = 0.779532  
 Thermal correction to Enthalpy = 0.780477  
 Thermal correction to Gibbs Free Energy = 0.577492  
 Sum of electronic and zero-point Energies = -2180.558242  
 Sum of electronic and thermal Energies = -2180.482014  
 Sum of electronic and thermal Enthalpies = -2180.481070  
 Sum of electronic and thermal Free Energies = -2180.684055

Coordinates: **B**

|    |             |             |             |
|----|-------------|-------------|-------------|
| Ru | 13.72790000 | 10.44320000 | 18.23330000 |
| H  | 12.17780000 | 10.73000000 | 17.25230000 |
| Ru | 12.06400000 | 9.63900000  | 15.83890000 |
| H  | 13.22440000 | 10.71040000 | 15.06840000 |
| Ru | 14.95250000 | 10.34900000 | 15.74660000 |
| Fe | 8.80430000  | 13.66790000 | 18.97380000 |
| S  | 13.92650000 | 8.46730000  | 16.84870000 |
| P  | 12.40380000 | 9.99160000  | 20.12390000 |
| P  | 10.26010000 | 11.01890000 | 15.15620000 |
| F  | 6.70510000  | 6.63790000  | 14.89230000 |
| F  | 5.49430000  | 7.00080000  | 13.19770000 |
| F  | 5.38560000  | 8.29460000  | 14.86450000 |
| F  | 9.06200000  | 8.37300000  | 9.60450000  |
| F  | 7.71890000  | 10.01190000 | 9.55090000  |
| F  | 9.79080000  | 10.34930000 | 9.79360000  |
| F  | 7.80190000  | 13.84970000 | 11.00380000 |
| F  | 6.97150000  | 14.83610000 | 12.68400000 |
| F  | 8.21200000  | 15.89580000 | 11.34040000 |
| F  | 12.45220000 | 16.92950000 | 13.67520000 |
| F  | 13.21470000 | 15.62220000 | 15.14250000 |
| F  | 13.70090000 | 15.32110000 | 13.09750000 |
| O  | 16.27600000 | 10.00810000 | 19.82370000 |
| O  | 13.76560000 | 13.46610000 | 18.55480000 |
| O  | 10.10460000 | 7.74090000  | 17.23330000 |
| O  | 12.12230000 | 8.01590000  | 13.25490000 |
| O  | 17.80910000 | 9.96210000  | 16.64000000 |
| O  | 15.48970000 | 13.24100000 | 14.99810000 |
| C  | 15.31370000 | 10.17080000 | 19.21260000 |
| C  | 13.72730000 | 12.31580000 | 18.47760000 |
| C  | 10.83110000 | 8.47230000  | 16.72550000 |
| C  | 12.08150000 | 8.62070000  | 14.23100000 |
| C  | 16.71130000 | 10.11320000 | 16.31090000 |
| C  | 15.30640000 | 12.12580000 | 15.24470000 |
| C  | 12.47550000 | 11.23410000 | 21.49600000 |
| C  | 13.66750000 | 11.93430000 | 21.71110000 |
| C  | 13.77610000 | 12.82220000 | 22.78780000 |
| C  | 12.69260000 | 13.01200000 | 23.65120000 |

|   |             |             |             |
|---|-------------|-------------|-------------|
| C | 11.50160000 | 12.31240000 | 23.43550000 |
| C | 11.39100000 | 11.42140000 | 22.36120000 |
| C | 12.98730000 | 8.51200000  | 21.06880000 |
| C | 12.87940000 | 8.43220000  | 22.46240000 |
| C | 13.32690000 | 7.28850000  | 23.13350000 |
| C | 13.88180000 | 6.22270000  | 22.41810000 |
| C | 13.99270000 | 6.30410000  | 21.02710000 |
| C | 13.55040000 | 7.44870000  | 20.35340000 |
| C | 10.57540000 | 9.69890000  | 20.01690000 |
| C | 10.12460000 | 8.46070000  | 20.50600000 |
| C | 8.76730000  | 8.13700000  | 20.53810000 |
| C | 7.82700000  | 9.05350000  | 20.05980000 |
| C | 8.26160000  | 10.27360000 | 19.55230000 |
| C | 9.63190000  | 10.62380000 | 19.52480000 |
| C | 9.90920000  | 11.94110000 | 18.93310000 |
| C | 9.50220000  | 12.34830000 | 17.55420000 |
| C | 10.01120000 | 13.71340000 | 17.33610000 |
| C | 10.72230000 | 14.15030000 | 18.54310000 |
| C | 10.65680000 | 13.06400000 | 19.52730000 |
| C | 6.77100000  | 13.43890000 | 19.01010000 |
| C | 7.14850000  | 14.73580000 | 18.43330000 |
| C | 7.94610000  | 15.45970000 | 19.43270000 |
| C | 8.05900000  | 14.60920000 | 20.62750000 |
| C | 7.33800000  | 13.35880000 | 20.36390000 |
| C | 8.92930000  | 11.45150000 | 16.50790000 |
| C | 7.64890000  | 12.04670000 | 15.92560000 |
| C | 9.18150000  | 10.05260000 | 13.96810000 |
| C | 8.17760000  | 9.20800000  | 14.44630000 |
| C | 7.36220000  | 8.50040000  | 13.54480000 |
| C | 6.26590000  | 7.62670000  | 14.09720000 |
| C | 7.56630000  | 8.61520000  | 12.16610000 |
| C | 8.59880000  | 9.44050000  | 11.69300000 |
| C | 8.79810000  | 9.54540000  | 10.20130000 |
| C | 9.41190000  | 10.14760000 | 12.58880000 |
| C | 10.33720000 | 12.64240000 | 14.24180000 |
| C | 9.25490000  | 13.06430000 | 13.46230000 |
| C | 9.29330000  | 14.30900000 | 12.81370000 |
| C | 8.11050000  | 14.72140000 | 11.97780000 |
| C | 10.40730000 | 15.14520000 | 12.95300000 |
| C | 11.48250000 | 14.72510000 | 13.74660000 |
| C | 12.68050000 | 15.62690000 | 13.91100000 |
| C | 11.46000000 | 13.46520000 | 14.37210000 |
| H | 11.16960000 | 13.06840000 | 20.48020000 |
| H | 9.97330000  | 14.26590000 | 16.40800000 |
| H | 6.87360000  | 12.08670000 | 16.71120000 |
| H | 7.77160000  | 13.09050000 | 15.59900000 |



|   |             |             |             |
|---|-------------|-------------|-------------|
| H | 7.21180000  | 11.47590000 | 15.09960000 |
| H | 8.66840000  | 10.46270000 | 16.98600000 |
| H | 6.75760000  | 15.15590000 | 17.51880000 |
| H | 6.03450000  | 12.76600000 | 18.59950000 |
| H | 7.10390000  | 12.60440000 | 21.10010000 |
| H | 8.45430000  | 14.92020000 | 21.58260000 |
| H | 8.23950000  | 16.49730000 | 19.37100000 |
| H | 11.34090000 | 15.03590000 | 18.62410000 |
| H | 12.77740000 | 13.70380000 | 24.49010000 |
| H | 14.70750000 | 13.36500000 | 22.95290000 |
| H | 14.53620000 | 11.80870000 | 21.05910000 |
| H | 12.45540000 | 9.24110000  | 23.06230000 |
| H | 13.24560000 | 7.23110000  | 24.21850000 |
| H | 14.23050000 | 5.33300000  | 22.94370000 |
| H | 14.42920000 | 5.47890000  | 20.46270000 |
| H | 13.66150000 | 7.48150000  | 19.25920000 |
| H | 6.76400000  | 8.81160000  | 20.07940000 |
| H | 8.44590000  | 7.17010000  | 20.92440000 |
| H | 7.52980000  | 10.99520000 | 19.16990000 |
| H | 12.33260000 | 13.14120000 | 14.95690000 |
| H | 10.22450000 | 10.77150000 | 12.19330000 |
| H | 8.00010000  | 9.07830000  | 15.52180000 |
| H | 6.93470000  | 8.06800000  | 11.45570000 |
| H | 8.35860000  | 12.44230000 | 13.33510000 |
| H | 10.43940000 | 16.11620000 | 12.44450000 |
| H | 10.81560000 | 7.69150000  | 20.87240000 |
| H | 10.44190000 | 10.89310000 | 22.22360000 |
| H | 10.65470000 | 12.45950000 | 24.10570000 |

---

### Species CO

HF energy = -113.307959585

No imaginary frequency

Zero-point correction = 0.005033 (Hartree/Particle)

Thermal correction to Energy = 0.007394

Thermal correction to Enthalpy = 0.008338

Thermal correction to Gibbs Free Energy = -0.014099

Sum of electronic and zero-point Energies = -113.302926

Sum of electronic and thermal Energies = -113.300566

Sum of electronic and thermal Enthalpies = -113.299621

Sum of electronic and thermal Free Energies = -113.322058

### Coordinates: CO

|   |              |              |              |
|---|--------------|--------------|--------------|
| C | -0.000000289 | -0.000005840 | -0.000000214 |
| O | 0.000000289  | 0.000005840  | 0.000000214  |

---

**Species C**

HF energy = -345.788827461

No imaginary frequency

Zero-point correction = 0.124101 (Hartree/Particle)

Thermal correction to Energy = 0.132046

Thermal correction to Enthalpy = 0.132990

Thermal correction to Gibbs Free Energy = 0.091776

Sum of electronic and zero-point Energies = -345.664726

Sum of electronic and thermal Energies = -345.656781

Sum of electronic and thermal Enthalpies = -345.655837

Sum of electronic and thermal Free Energies = -345.697051

**Coordinates: C**

|   |             |             |             |
|---|-------------|-------------|-------------|
| C | -2.53660000 | 1.26390000  | 0.05650000  |
| H | -3.62460000 | 1.33420000  | 0.06220000  |
| C | -1.87280000 | 2.43200000  | -0.04110000 |
| C | -1.97150000 | -0.11900000 | 0.15860000  |
| H | -2.31680000 | -0.60380000 | 1.08360000  |
| H | -2.33950000 | -0.74270000 | -0.66930000 |
| H | -0.87790000 | -0.14900000 | 0.14680000  |
| C | -0.37500000 | 2.61020000  | -0.07020000 |
| H | -0.05570000 | 3.10990000  | -0.99360000 |
| H | -0.03770000 | 3.24580000  | 0.75840000  |
| H | 0.15150000  | 1.65380000  | -0.00140000 |
| C | -2.72530000 | 3.65470000  | -0.12750000 |
| O | -1.98380000 | 4.79120000  | -0.22350000 |
| H | -2.62350000 | 5.52100000  | -0.27390000 |
| O | -3.93820000 | 3.69290000  | -0.11800000 |

---

**Species D**

HF energy = -2527.066253703269

No imaginary frequency

Zero-point correction = 0.829494 (Hartree/Particle)

Thermal correction to Energy = 0.914558

Thermal correction to Enthalpy = 0.915502

Thermal correction to Gibbs Free Energy = 0.695013

Sum of electronic and zero-point Energies = -2526.236760

Sum of electronic and thermal Energies = -2526.151696

Sum of electronic and thermal Enthalpies = -2526.150751

Sum of electronic and thermal Free Energies = -2526.371241

**Coordinates: D**

|    |            |             |             |
|----|------------|-------------|-------------|
| Ru | 9.20980000 | 12.71780000 | 17.48030000 |
|----|------------|-------------|-------------|

|    |             |             |             |
|----|-------------|-------------|-------------|
| H  | 7.77630000  | 12.63080000 | 18.64190000 |
| Ru | 6.79100000  | 11.16310000 | 18.38380000 |
| H  | 6.12400000  | 11.98310000 | 16.96900000 |
| Ru | 7.34040000  | 11.98060000 | 15.52100000 |
| Fe | 7.52570000  | 15.79770000 | 22.24900000 |
| S  | 8.58680000  | 10.46020000 | 16.92980000 |
| P  | 10.67170000 | 12.73910000 | 19.32200000 |
| P  | 5.25480000  | 12.23250000 | 19.84110000 |
| F  | 5.15530000  | 7.75390000  | 23.26650000 |
| F  | 3.16290000  | 7.61500000  | 23.95930000 |
| F  | 4.34990000  | 9.27730000  | 24.49840000 |
| F  | 0.69560000  | 9.18550000  | 18.59290000 |
| F  | -0.16680000 | 8.64400000  | 20.44560000 |
| F  | -0.12790000 | 10.67340000 | 19.85710000 |
| F  | 0.02000000  | 13.92700000 | 20.95700000 |
| F  | 1.15570000  | 15.30760000 | 22.09240000 |
| F  | -0.03950000 | 15.98710000 | 20.48740000 |
| F  | 3.60370000  | 17.58500000 | 17.10740000 |
| F  | 4.55780000  | 16.04740000 | 16.01270000 |
| F  | 2.45500000  | 16.25360000 | 15.92440000 |
| O  | 11.60090000 | 12.89060000 | 15.62180000 |
| O  | 8.62740000  | 15.70560000 | 17.41080000 |
| O  | 8.07210000  | 9.69800000  | 20.74020000 |
| O  | 4.81320000  | 8.87040000  | 17.97330000 |
| O  | 9.35390000  | 12.44050000 | 13.31070000 |
| O  | 6.12230000  | 14.72500000 | 15.03790000 |
| C  | 10.67790000 | 12.82540000 | 16.31100000 |
| C  | 8.87480000  | 14.57870000 | 17.46800000 |
| C  | 7.59590000  | 10.27510000 | 19.86700000 |
| C  | 5.58720000  | 9.71060000  | 18.07990000 |
| C  | 8.59150000  | 12.25140000 | 14.15710000 |
| C  | 6.57150000  | 13.66860000 | 15.17650000 |
| C  | 11.60130000 | 14.32160000 | 19.61240000 |
| C  | 11.92790000 | 15.12660000 | 18.51620000 |
| C  | 12.68910000 | 16.28760000 | 18.69780000 |
| C  | 13.12450000 | 16.64710000 | 19.97670000 |
| C  | 12.79680000 | 15.84340000 | 21.07270000 |
| C  | 12.03850000 | 14.68030000 | 20.89340000 |
| C  | 12.12920000 | 11.61170000 | 19.11440000 |
| C  | 13.39580000 | 11.92740000 | 19.61920000 |
| C  | 14.46070000 | 11.03640000 | 19.44210000 |
| C  | 14.26580000 | 9.83000000  | 18.76250000 |
| C  | 13.00170000 | 9.51700000  | 18.25440000 |
| C  | 11.93610000 | 10.40840000 | 18.42540000 |
| C  | 10.13490000 | 12.35390000 | 21.05980000 |
| C  | 10.79670000 | 11.28600000 | 21.68850000 |

|   |             |             |             |
|---|-------------|-------------|-------------|
| C | 10.52620000 | 10.93650000 | 23.01290000 |
| C | 9.56440000  | 11.64940000 | 23.73330000 |
| C | 8.88570000  | 12.69480000 | 23.11490000 |
| C | 9.15780000  | 13.07120000 | 21.77930000 |
| C | 8.33070000  | 14.17930000 | 21.27800000 |
| C | 6.83890000  | 14.15230000 | 21.21700000 |
| C | 6.40510000  | 15.41520000 | 20.59510000 |
| C | 7.59410000  | 16.21230000 | 20.27050000 |
| C | 8.77840000  | 15.45610000 | 20.69470000 |
| C | 6.99580000  | 15.50480000 | 24.20380000 |
| C | 6.21410000  | 16.59150000 | 23.59950000 |
| C | 7.15600000  | 17.60820000 | 23.11140000 |
| C | 8.51950000  | 17.14860000 | 23.41650000 |
| C | 8.42040000  | 15.84700000 | 24.08650000 |
| C | 5.97840000  | 12.96430000 | 21.49130000 |
| C | 4.91290000  | 13.29790000 | 22.53360000 |
| C | 4.09360000  | 10.95510000 | 20.57010000 |
| C | 4.48330000  | 10.20120000 | 21.68100000 |
| C | 3.60500000  | 9.25310000  | 22.23260000 |
| C | 4.04610000  | 8.48680000  | 23.45300000 |
| C | 2.34600000  | 9.03210000  | 21.66050000 |
| C | 1.97390000  | 9.76880000  | 20.52880000 |
| C | 0.62860000  | 9.56250000  | 19.87890000 |
| C | 2.84770000  | 10.72050000 | 19.97800000 |
| C | 4.01020000  | 13.55060000 | 19.40130000 |
| C | 2.89470000  | 13.76610000 | 20.21640000 |
| C | 1.98850000  | 14.79690000 | 19.91710000 |
| C | 0.80810000  | 15.00650000 | 20.82830000 |
| C | 2.19160000  | 15.61110000 | 18.79790000 |
| C | 3.30700000  | 15.38450000 | 17.97750000 |
| C | 3.48870000  | 16.28610000 | 16.78210000 |
| C | 4.21360000  | 14.35350000 | 18.27360000 |
| H | 9.80040000  | 15.75590000 | 20.50150000 |
| H | 5.39420000  | 15.67220000 | 20.31300000 |
| H | 5.39940000  | 13.47140000 | 23.50990000 |
| H | 4.38190000  | 14.23680000 | 22.31380000 |
| H | 4.17040000  | 12.51160000 | 22.70390000 |
| H | 6.62810000  | 12.14130000 | 21.91090000 |
| H | 5.14330000  | 16.71000000 | 23.66740000 |
| H | 6.59090000  | 14.71040000 | 24.81100000 |
| H | 9.23390000  | 15.33110000 | 24.57420000 |
| H | 9.41690000  | 17.74040000 | 23.31810000 |
| H | 6.89020000  | 18.59350000 | 22.75850000 |
| H | 7.60550000  | 17.10750000 | 19.66090000 |
| H | 13.71750000 | 17.55110000 | 20.11810000 |
| H | 12.94280000 | 16.91030000 | 17.83930000 |

|   |             |             |             |
|---|-------------|-------------|-------------|
| H | 11.60800000 | 14.87740000 | 17.50110000 |
| H | 13.59600000 | 12.85920000 | 20.15320000 |
| H | 15.44640000 | 11.28730000 | 19.83250000 |
| H | 15.09730000 | 9.13830000  | 18.62540000 |
| H | 12.84330000 | 8.58080000  | 17.71800000 |
| H | 10.95800000 | 10.13450000 | 18.00300000 |
| H | 9.34430000  | 11.38490000 | 24.76780000 |
| H | 11.05610000 | 10.10480000 | 23.47640000 |
| H | 8.12410000  | 13.25360000 | 23.67120000 |
| H | 5.07680000  | 14.18440000 | 17.61410000 |
| H | 2.52920000  | 11.26680000 | 19.08000000 |
| H | 5.46960000  | 10.33150000 | 22.14500000 |
| H | 1.66280000  | 8.29010000  | 22.08970000 |
| H | 2.69630000  | 13.14230000 | 21.09860000 |
| H | 1.48950000  | 16.41880000 | 18.55700000 |
| H | 11.54350000 | 10.67460000 | 21.16740000 |
| H | 11.80080000 | 14.07820000 | 21.77620000 |
| H | 13.13260000 | 16.12150000 | 22.07150000 |
| C | 5.33360000  | 10.90230000 | 14.52920000 |
| H | 4.97440000  | 10.42530000 | 15.43660000 |
| C | 6.39170000  | 10.27060000 | 13.90220000 |
| C | 4.36280000  | 11.85140000 | 13.87460000 |
| H | 3.54780000  | 11.26980000 | 13.41440000 |
| H | 3.90620000  | 12.52280000 | 14.60930000 |
| H | 4.81730000  | 12.46390000 | 13.09060000 |
| C | 6.77670000  | 10.51770000 | 12.45710000 |
| H | 7.84120000  | 10.35010000 | 12.28220000 |
| H | 6.22680000  | 9.81800000  | 11.81020000 |
| H | 6.52790000  | 11.53370000 | 12.13750000 |
| C | 6.88960000  | 9.00290000  | 14.53000000 |
| O | 7.97220000  | 8.49930000  | 13.88690000 |
| H | 8.22310000  | 7.69940000  | 14.37790000 |
| O | 6.38380000  | 8.42370000  | 15.46950000 |

---

### Species TSDE

HF energy = -2527.031281279194

Imaginary frequency: 846i

Zero-point correction = 0.827784 (Hartree/Particle)

Thermal correction to Energy = 0.912524

Thermal correction to Enthalpy = 0.913468

Thermal correction to Gibbs Free Energy = 0.694254

Sum of electronic and zero-point Energies = -2526.203497

Sum of electronic and thermal Energies = -2526.118757

Sum of electronic and thermal Enthalpies = -2526.117813

Sum of electronic and thermal Free Energies = -2526.337027

Coordinates: **TSDE**

|    |             |             |             |
|----|-------------|-------------|-------------|
| Ru | 9.27840000  | 12.60910000 | 17.51680000 |
| H  | 7.84360000  | 12.62400000 | 18.62980000 |
| Ru | 6.88170000  | 11.11540000 | 18.45150000 |
| H  | 5.87480000  | 10.97700000 | 16.28690000 |
| Ru | 7.27540000  | 11.80230000 | 15.61940000 |
| Fe | 7.57580000  | 15.87390000 | 22.16150000 |
| S  | 8.63600000  | 10.33630000 | 17.00860000 |
| P  | 10.69550000 | 12.67000000 | 19.35370000 |
| P  | 5.27340000  | 12.28490000 | 19.79790000 |
| F  | 5.05220000  | 7.96570000  | 23.44220000 |
| F  | 3.02240000  | 7.82840000  | 24.01710000 |
| F  | 4.14890000  | 9.53810000  | 24.53740000 |
| F  | 0.90690000  | 9.08020000  | 18.39760000 |
| F  | -0.05150000 | 8.53570000  | 20.20110000 |
| F  | -0.06430000 | 10.55330000 | 19.57030000 |
| F  | -0.07620000 | 13.81330000 | 20.60080000 |
| F  | 0.93190000  | 15.15780000 | 21.88960000 |
| F  | -0.15320000 | 15.89290000 | 20.23180000 |
| F  | 3.71590000  | 17.76730000 | 17.28260000 |
| F  | 4.81230000  | 16.33030000 | 16.18810000 |
| F  | 2.72090000  | 16.49480000 | 15.91170000 |
| O  | 11.75090000 | 12.56480000 | 15.74420000 |
| O  | 8.77280000  | 15.60760000 | 17.33590000 |
| O  | 8.03980000  | 9.81140000  | 20.94240000 |
| O  | 5.04020000  | 8.71200000  | 18.09510000 |
| O  | 9.31030000  | 12.95790000 | 13.65570000 |
| O  | 5.59970000  | 14.33290000 | 15.40480000 |
| C  | 10.80270000 | 12.58980000 | 16.39860000 |
| C  | 8.99050000  | 14.47940000 | 17.44470000 |
| C  | 7.60820000  | 10.35760000 | 20.02320000 |
| C  | 5.72910000  | 9.62930000  | 18.20840000 |
| C  | 8.60000000  | 12.51950000 | 14.45090000 |
| C  | 6.23100000  | 13.36150000 | 15.43930000 |
| C  | 11.64750000 | 14.24580000 | 19.59200000 |
| C  | 12.00030000 | 15.00850000 | 18.47360000 |
| C  | 12.77810000 | 16.16250000 | 18.62550000 |
| C  | 13.20570000 | 16.55710000 | 19.89690000 |
| C  | 12.85390000 | 15.79490000 | 21.01470000 |
| C  | 12.07840000 | 14.63890000 | 20.86500000 |
| C  | 12.12320000 | 11.50100000 | 19.19860000 |
| C  | 13.41450000 | 11.84210000 | 19.61650000 |
| C  | 14.45740000 | 10.91660000 | 19.49050000 |
| C  | 14.21580000 | 9.65080000  | 18.94850000 |

|   |             |             |             |
|---|-------------|-------------|-------------|
| C | 12.92680000 | 9.31180000  | 18.52610000 |
| C | 11.88320000 | 10.23650000 | 18.64610000 |
| C | 10.12710000 | 12.36340000 | 21.09320000 |
| C | 10.78150000 | 11.32380000 | 21.77710000 |
| C | 10.48610000 | 11.02230000 | 23.10750000 |
| C | 9.50470000  | 11.75500000 | 23.78050000 |
| C | 8.83940000  | 12.77700000 | 23.11150000 |
| C | 9.14150000  | 13.10960000 | 21.77020000 |
| C | 8.33970000  | 14.21540000 | 21.22540000 |
| C | 6.84810000  | 14.22510000 | 21.15990000 |
| C | 6.44960000  | 15.48650000 | 20.51240000 |
| C | 7.65950000  | 16.24570000 | 20.17440000 |
| C | 8.82250000  | 15.46780000 | 20.61670000 |
| C | 7.03710000  | 15.63380000 | 24.12140000 |
| C | 6.28010000  | 16.72420000 | 23.49330000 |
| C | 7.24460000  | 17.70940000 | 22.98550000 |
| C | 8.59760000  | 17.22700000 | 23.30240000 |
| C | 8.46920000  | 15.94200000 | 23.99870000 |
| C | 5.95410000  | 13.06530000 | 21.44770000 |
| C | 4.85230000  | 13.45970000 | 22.42880000 |
| C | 4.10660000  | 11.01030000 | 20.52370000 |
| C | 4.43840000  | 10.32350000 | 21.69490000 |
| C | 3.54810000  | 9.37890000  | 22.23400000 |
| C | 3.92320000  | 8.68760000  | 23.51980000 |
| C | 2.33840000  | 9.09220000  | 21.58990000 |
| C | 2.02700000  | 9.75970000  | 20.39830000 |
| C | 0.73740000  | 9.47930000  | 19.66830000 |
| C | 2.91000000  | 10.71080000 | 19.86210000 |
| C | 4.02360000  | 13.59740000 | 19.33700000 |
| C | 2.84620000  | 13.74920000 | 20.07580000 |
| C | 1.94370000  | 14.77970000 | 19.76350000 |
| C | 0.69130000  | 14.91520000 | 20.58870000 |
| C | 2.21600000  | 15.66380000 | 18.71400000 |
| C | 3.40030000  | 15.50970000 | 17.97850000 |
| C | 3.66790000  | 16.48980000 | 16.86370000 |
| C | 4.29980000  | 14.47540000 | 18.28410000 |
| H | 9.85260000  | 15.73600000 | 20.42100000 |
| H | 5.44520000  | 15.76750000 | 20.22960000 |
| H | 5.30560000  | 13.71970000 | 23.40200000 |
| H | 4.30800000  | 14.36540000 | 22.12200000 |
| H | 4.12080000  | 12.67210000 | 22.63730000 |
| H | 6.56940000  | 12.24700000 | 21.92360000 |
| H | 5.21190000  | 16.86670000 | 23.55600000 |
| H | 6.61490000  | 14.86200000 | 24.74590000 |
| H | 9.27030000  | 15.41840000 | 24.49870000 |
| H | 9.50770000  | 17.79690000 | 23.19290000 |

|   |             |             |             |
|---|-------------|-------------|-------------|
| H | 7.00070000  | 18.69280000 | 22.61190000 |
| H | 7.69470000  | 17.12920000 | 19.54920000 |
| H | 13.81160000 | 17.45600000 | 20.01510000 |
| H | 13.05110000 | 16.75260000 | 17.75010000 |
| H | 11.68850000 | 14.73100000 | 17.46320000 |
| H | 13.65190000 | 12.82010000 | 20.04220000 |
| H | 15.46220000 | 11.18720000 | 19.81340000 |
| H | 15.03000000 | 8.93200000  | 18.85110000 |
| H | 12.73160000 | 8.32850000  | 18.09610000 |
| H | 10.88480000 | 9.93920000  | 18.29390000 |
| H | 9.26050000  | 11.52420000 | 24.81770000 |
| H | 11.01000000 | 10.21120000 | 23.61230000 |
| H | 8.06500000  | 13.35330000 | 23.63160000 |
| H | 5.21800000  | 14.36960000 | 17.69040000 |
| H | 2.63770000  | 11.20840000 | 18.92190000 |
| H | 5.38840000  | 10.50310000 | 22.21550000 |
| H | 1.64610000  | 8.35320000  | 22.00970000 |
| H | 2.59720000  | 13.08010000 | 20.91040000 |
| H | 1.51660000  | 16.47080000 | 18.46390000 |
| H | 11.54310000 | 10.69750000 | 21.29690000 |
| H | 11.82340000 | 14.06920000 | 21.76460000 |
| H | 13.18420000 | 16.09980000 | 22.00760000 |
| C | 5.55370000  | 10.28270000 | 15.03600000 |
| H | 5.71440000  | 9.30220000  | 15.48700000 |
| C | 6.47780000  | 10.53650000 | 13.95510000 |
| C | 4.08900000  | 10.68350000 | 14.94210000 |
| H | 3.58840000  | 10.04230000 | 14.20350000 |
| H | 3.58160000  | 10.54240000 | 15.90320000 |
| H | 3.95510000  | 11.72470000 | 14.63400000 |
| C | 6.05140000  | 11.29680000 | 12.70510000 |
| H | 6.91400000  | 11.69160000 | 12.16280000 |
| H | 5.50970000  | 10.62930000 | 12.01630000 |
| H | 5.39060000  | 12.13390000 | 12.94790000 |
| C | 7.46730000  | 9.42700000  | 13.73000000 |
| O | 8.31580000  | 9.69310000  | 12.70170000 |
| H | 8.90950000  | 8.92610000  | 12.64260000 |
| O | 7.52460000  | 8.37850000  | 14.33860000 |

---

### Species E

HF energy = -2527.038102460158

No imaginary frequency

Zero-point correction = 0.831038 (Hartree/Particle)

Thermal correction to Energy = 0.916231

Thermal correction to Enthalpy = 0.917175

Thermal correction to Gibbs Free Energy = 0.695325



Sum of electronic and zero-point Energies = -2526.207065  
Sum of electronic and thermal Energies = -2526.121872  
Sum of electronic and thermal Enthalpies = -2526.120927  
Sum of electronic and thermal Free Energies = -2526.342777

Coordinates: **E**

|    |             |             |             |
|----|-------------|-------------|-------------|
| Ru | 9.07640000  | 12.62030000 | 17.55110000 |
| H  | 7.76670000  | 12.60610000 | 18.77900000 |
| Ru | 6.77050000  | 11.10140000 | 18.60230000 |
| H  | 5.90930000  | 9.93240000  | 15.84760000 |
| Ru | 6.98650000  | 11.51220000 | 15.76350000 |
| Fe | 7.60300000  | 15.82710000 | 22.32960000 |
| S  | 8.54920000  | 10.31650000 | 17.18340000 |
| P  | 10.59960000 | 12.71110000 | 19.28690000 |
| P  | 5.20240000  | 12.33880000 | 19.89510000 |
| F  | 4.61570000  | 7.88520000  | 23.34910000 |
| F  | 2.60720000  | 7.97920000  | 24.00150000 |
| F  | 3.95540000  | 9.51630000  | 24.52870000 |
| F  | 0.51010000  | 9.57350000  | 18.48900000 |
| F  | -0.47240000 | 9.13790000  | 20.30890000 |
| F  | -0.26770000 | 11.14430000 | 19.67910000 |
| F  | 0.01240000  | 14.38700000 | 20.68260000 |
| F  | 1.15360000  | 15.63670000 | 21.95580000 |
| F  | 0.14450000  | 16.45980000 | 20.29180000 |
| F  | 4.14940000  | 17.91090000 | 17.30480000 |
| F  | 5.13170000  | 16.36610000 | 16.25420000 |
| F  | 3.06810000  | 16.70380000 | 15.94090000 |
| O  | 11.40100000 | 12.59670000 | 15.56860000 |
| O  | 8.49340000  | 15.61540000 | 17.47940000 |
| O  | 7.83540000  | 9.69910000  | 21.09890000 |
| O  | 4.73570000  | 8.89990000  | 18.08570000 |
| O  | 8.37070000  | 13.66680000 | 14.15700000 |
| O  | 4.42600000  | 13.15770000 | 15.64930000 |
| C  | 10.51870000 | 12.61570000 | 16.30520000 |
| C  | 8.75220000  | 14.49480000 | 17.54180000 |
| C  | 7.44290000  | 10.29130000 | 20.18820000 |
| C  | 5.50980000  | 9.74420000  | 18.25040000 |
| C  | 7.91090000  | 12.85170000 | 14.83940000 |
| C  | 5.40680000  | 12.54200000 | 15.66920000 |
| C  | 11.51950000 | 14.30170000 | 19.47470000 |
| C  | 11.78320000 | 15.08650000 | 18.34690000 |
| C  | 12.54830000 | 16.25230000 | 18.46620000 |
| C  | 13.05300000 | 16.63460000 | 19.71330000 |
| C  | 12.79140000 | 15.84890000 | 20.83960000 |
| C  | 12.02760000 | 14.68130000 | 20.72340000 |
| C  | 12.03070000 | 11.57540000 | 19.02930000 |

|   |             |             |             |
|---|-------------|-------------|-------------|
| C | 13.34660000 | 11.97640000 | 19.29030000 |
| C | 14.40320000 | 11.07770000 | 19.10250000 |
| C | 14.15280000 | 9.77750000  | 18.65380000 |
| C | 12.83970000 | 9.37730000  | 18.38910000 |
| C | 11.78180000 | 10.27440000 | 18.57280000 |
| C | 10.10550000 | 12.37390000 | 21.03150000 |
| C | 10.80360000 | 11.33050000 | 21.66720000 |
| C | 10.55100000 | 10.98130000 | 22.99390000 |
| C | 9.56780000  | 11.66680000 | 23.71330000 |
| C | 8.86720000  | 12.69750000 | 23.09660000 |
| C | 9.12920000  | 13.08340000 | 21.76070000 |
| C | 8.30720000  | 14.20660000 | 21.28560000 |
| C | 6.81420000  | 14.22980000 | 21.28830000 |
| C | 6.40140000  | 15.52290000 | 20.71570000 |
| C | 7.60120000  | 16.28890000 | 20.35970000 |
| C | 8.77450000  | 15.48310000 | 20.71370000 |
| C | 7.13460000  | 15.50480000 | 24.29620000 |
| C | 6.37400000  | 16.63510000 | 23.74870000 |
| C | 7.33570000  | 17.62730000 | 23.24920000 |
| C | 8.69100000  | 17.10950000 | 23.49120000 |
| C | 8.56630000  | 15.79610000 | 24.13240000 |
| C | 5.91390000  | 13.07020000 | 21.55950000 |
| C | 4.83510000  | 13.45050000 | 22.57120000 |
| C | 3.92650000  | 11.15780000 | 20.58910000 |
| C | 4.22090000  | 10.38950000 | 21.71980000 |
| C | 3.25500000  | 9.51580000  | 22.24760000 |
| C | 3.58970000  | 8.73780000  | 23.49400000 |
| C | 2.00810000  | 9.37410000  | 21.62600000 |
| C | 1.73530000  | 10.11600000 | 20.46980000 |
| C | 0.41030000  | 9.98680000  | 19.76250000 |
| C | 2.69400000  | 10.99920000 | 19.94620000 |
| C | 4.07180000  | 13.75420000 | 19.42000000 |
| C | 2.91640000  | 14.02690000 | 20.15730000 |
| C | 2.11820000  | 15.13730000 | 19.83310000 |
| C | 0.88710000  | 15.40520000 | 20.65760000 |
| C | 2.47250000  | 15.97680000 | 18.77180000 |
| C | 3.63490000  | 15.69980000 | 18.03690000 |
| C | 3.99270000  | 16.63470000 | 16.91070000 |
| C | 4.42860000  | 14.58510000 | 18.35300000 |
| H | 9.79620000  | 15.75490000 | 20.48670000 |
| H | 5.38800000  | 15.82350000 | 20.49020000 |
| H | 5.30830000  | 13.66790000 | 23.54510000 |
| H | 4.30100000  | 14.37420000 | 22.30500000 |
| H | 4.09280000  | 12.66950000 | 22.76590000 |
| H | 6.52790000  | 12.23120000 | 21.99950000 |
| H | 5.31130000  | 16.79110000 | 23.85830000 |

|   |             |             |             |
|---|-------------|-------------|-------------|
| H | 6.72270000  | 14.71080000 | 24.89960000 |
| H | 9.37600000  | 15.23730000 | 24.57760000 |
| H | 9.60590000  | 17.66970000 | 23.37330000 |
| H | 7.09500000  | 18.63070000 | 22.93130000 |
| H | 7.61630000  | 17.20030000 | 19.77560000 |
| H | 13.64940000 | 17.54330000 | 19.80590000 |
| H | 12.75140000 | 16.86200000 | 17.58500000 |
| H | 11.40950000 | 14.81630000 | 17.35530000 |
| H | 13.59520000 | 12.98230000 | 19.63800000 |
| H | 15.42560000 | 11.39580000 | 19.30420000 |
| H | 14.97790000 | 9.07960000  | 18.50700000 |
| H | 12.63500000 | 8.36650000  | 18.03200000 |
| H | 10.76360000 | 9.92250000  | 18.34880000 |
| H | 9.34990000  | 11.39180000 | 24.74590000 |
| H | 11.10510000 | 10.16660000 | 23.45920000 |
| H | 8.09280000  | 13.23810000 | 23.65440000 |
| H | 5.32610000  | 14.37230000 | 17.75730000 |
| H | 2.45170000  | 11.55270000 | 19.02900000 |
| H | 5.20020000  | 10.44820000 | 22.21340000 |
| H | 1.25790000  | 8.68810000  | 22.03540000 |
| H | 2.60530000  | 13.39250000 | 20.99820000 |
| H | 1.85350000  | 16.84360000 | 18.51110000 |
| H | 11.56940000 | 10.73950000 | 21.15050000 |
| H | 11.84220000 | 14.09200000 | 21.62800000 |
| H | 13.18260000 | 16.14470000 | 21.81330000 |
| C | 6.09940000  | 9.42960000  | 14.79450000 |
| H | 6.66190000  | 8.54090000  | 15.09790000 |
| C | 6.95930000  | 10.30750000 | 13.93470000 |
| C | 4.68100000  | 9.08610000  | 14.32560000 |
| H | 4.72730000  | 8.50310000  | 13.39720000 |
| H | 4.16770000  | 8.48260000  | 15.08260000 |
| H | 4.07660000  | 9.97940000  | 14.13680000 |
| C | 6.34140000  | 10.96450000 | 12.70210000 |
| H | 6.99900000  | 11.73650000 | 12.29550000 |
| H | 6.17130000  | 10.22390000 | 11.90390000 |
| H | 5.37820000  | 11.42870000 | 12.93570000 |
| C | 8.32630000  | 9.73410000  | 13.69910000 |
| O | 9.07630000  | 10.50370000 | 12.86180000 |
| H | 9.93380000  | 10.05290000 | 12.78750000 |
| O | 8.76770000  | 8.69690000  | 14.15360000 |

---

**Species H<sub>2</sub>**

HF energy = -1.17548238770

No imaginary frequency

Zero-point correction = 0.010145 (Hartree/Particle)

Thermal correction to Energy = 0.012505  
Thermal correction to Enthalpy = 0.013450  
Thermal correction to Gibbs Free Energy = -0.001342  
Sum of electronic and zero-point Energies = -1.165337  
Sum of electronic and thermal Energies = -1.162977  
Sum of electronic and thermal Enthalpies = -1.162033  
Sum of electronic and thermal Free Energies = -1.176825

Coordinates: **H<sub>2</sub>**

|   |              |             |             |
|---|--------------|-------------|-------------|
| H | 0.000000300  | 0.000000000 | 0.000000000 |
| H | -0.000000300 | 0.000000000 | 0.000000000 |

---

### Species F

HF energy = -2528.232971369584

No imaginary frequency

Zero-point correction = 0.848970 (Hartree/Particle)

Thermal correction to Energy = 0.934244

Thermal correction to Enthalpy = 0.935188

Thermal correction to Gibbs Free Energy = 0.713730

Sum of electronic and zero-point Energies = -2527.384001

Sum of electronic and thermal Energies = -2527.298727

Sum of electronic and thermal Enthalpies = -2527.297783

Sum of electronic and thermal Free Energies = -2527.519241

Coordinates: **F**

|    |             |             |             |
|----|-------------|-------------|-------------|
| Ru | 8.86210000  | 12.39040000 | 17.56700000 |
| H  | 7.52910000  | 12.54380000 | 18.81540000 |
| Ru | 6.44080000  | 11.09670000 | 18.83950000 |
| H  | 8.31890000  | 8.56430000  | 14.88510000 |
| Ru | 6.69620000  | 11.22390000 | 15.81790000 |
| Fe | 7.70260000  | 15.94300000 | 22.17670000 |
| S  | 8.13800000  | 10.13240000 | 17.42510000 |
| P  | 10.41530000 | 12.43150000 | 19.28930000 |
| P  | 5.00960000  | 12.41050000 | 20.19320000 |
| F  | 4.60090000  | 8.28060000  | 24.02320000 |
| F  | 2.62620000  | 8.40830000  | 24.76740000 |
| F  | 3.98450000  | 9.98860000  | 25.11410000 |
| F  | 0.20020000  | 9.62170000  | 19.30390000 |
| F  | -0.67600000 | 9.37280000  | 21.21190000 |
| F  | -0.47020000 | 11.31090000 | 20.39470000 |
| F  | -0.05100000 | 14.64610000 | 21.16630000 |
| F  | 1.20980000  | 16.00360000 | 22.19250000 |
| F  | 0.07300000  | 16.66030000 | 20.53630000 |
| F  | 3.89360000  | 17.65530000 | 17.08150000 |
| F  | 4.63550000  | 15.94680000 | 16.08180000 |

|   |             |             |             |
|---|-------------|-------------|-------------|
| F | 2.57330000  | 16.40520000 | 15.99240000 |
| O | 11.22520000 | 12.13750000 | 15.65050000 |
| O | 8.67950000  | 15.43820000 | 17.41790000 |
| O | 7.62230000  | 9.81920000  | 21.36340000 |
| O | 4.41420000  | 8.84690000  | 18.50910000 |
| O | 7.25740000  | 14.09270000 | 14.84700000 |
| O | 3.95570000  | 11.71550000 | 14.62100000 |
| C | 10.30220000 | 12.22690000 | 16.32240000 |
| C | 8.77320000  | 14.29390000 | 17.48960000 |
| C | 7.21250000  | 10.33540000 | 20.42020000 |
| C | 5.18090000  | 9.69090000  | 18.64430000 |
| C | 7.20410000  | 13.04740000 | 15.34010000 |
| C | 5.02330000  | 11.54110000 | 15.01540000 |
| C | 11.45360000 | 13.96140000 | 19.38300000 |
| C | 11.82350000 | 14.61500000 | 18.20220000 |
| C | 12.67950000 | 15.72150000 | 18.24830000 |
| C | 13.17100000 | 16.17700000 | 19.47560000 |
| C | 12.80520000 | 15.52220000 | 20.65520000 |
| C | 11.95110000 | 14.41370000 | 20.61160000 |
| C | 11.77660000 | 11.19780000 | 19.09200000 |
| C | 13.09010000 | 11.49160000 | 19.48070000 |
| C | 14.09750000 | 10.53230000 | 19.32980000 |
| C | 13.80090000 | 9.27590000  | 18.79230000 |
| C | 12.49110000 | 8.98170000  | 18.40350000 |
| C | 11.48260000 | 9.94130000  | 18.54960000 |
| C | 9.93200000  | 12.22860000 | 21.06360000 |
| C | 10.55950000 | 11.16540000 | 21.73790000 |
| C | 10.35020000 | 10.93340000 | 23.09780000 |
| C | 9.48230000  | 11.76240000 | 23.81390000 |
| C | 8.83860000  | 12.80470000 | 23.15540000 |
| C | 9.05230000  | 13.06580000 | 21.78130000 |
| C | 8.27540000  | 14.19970000 | 21.25790000 |
| C | 6.78660000  | 14.30670000 | 21.32600000 |
| C | 6.41000000  | 15.56110000 | 20.65100000 |
| C | 7.62820000  | 16.22500000 | 20.17390000 |
| C | 8.77600000  | 15.39210000 | 20.55030000 |
| C | 7.31920000  | 15.82530000 | 24.18330000 |
| C | 6.58730000  | 16.94020000 | 23.56850000 |
| C | 7.56930000  | 17.83110000 | 22.93540000 |
| C | 8.90840000  | 17.26640000 | 23.16210000 |
| C | 8.75330000  | 16.02500000 | 23.92820000 |
| C | 5.84360000  | 13.22960000 | 21.74750000 |
| C | 4.84320000  | 13.75290000 | 22.77570000 |
| C | 3.76530000  | 11.30950000 | 21.05420000 |
| C | 4.11500000  | 10.63300000 | 22.22650000 |
| C | 3.17290000  | 9.81810000  | 22.87700000 |

|   |             |             |             |
|---|-------------|-------------|-------------|
| C | 3.57420000  | 9.13480000  | 24.15890000 |
| C | 1.88880000  | 9.65040000  | 22.34410000 |
| C | 1.55620000  | 10.30400000 | 21.15080000 |
| C | 0.18660000  | 10.14740000 | 20.53850000 |
| C | 2.49370000  | 11.12360000 | 20.50090000 |
| C | 3.87980000  | 13.79010000 | 19.65370000 |
| C | 2.79270000  | 14.16800000 | 20.44730000 |
| C | 1.98350000  | 15.25140000 | 20.06670000 |
| C | 0.83020000  | 15.63690000 | 20.95510000 |
| C | 2.25690000  | 15.95670000 | 18.89000000 |
| C | 3.34540000  | 15.56900000 | 18.09420000 |
| C | 3.61270000  | 16.36320000 | 16.84050000 |
| C | 4.15300000  | 14.48310000 | 18.46930000 |
| H | 9.79720000  | 15.58800000 | 20.25080000 |
| H | 5.40290000  | 15.88880000 | 20.43530000 |
| H | 5.37960000  | 14.02450000 | 23.70230000 |
| H | 4.34520000  | 14.68100000 | 22.45820000 |
| H | 4.07360000  | 13.03270000 | 23.07290000 |
| H | 6.43680000  | 12.39940000 | 22.23060000 |
| H | 5.54060000  | 17.16220000 | 23.71300000 |
| H | 6.90080000  | 15.11320000 | 24.87740000 |
| H | 9.55670000  | 15.46790000 | 24.38650000 |
| H | 9.84230000  | 17.76490000 | 22.95080000 |
| H | 7.36170000  | 18.81310000 | 22.53660000 |
| H | 7.66290000  | 17.07630000 | 19.50470000 |
| H | 13.83790000 | 17.03940000 | 19.51110000 |
| H | 12.96330000 | 16.22690000 | 17.32390000 |
| H | 11.46690000 | 14.28740000 | 17.22130000 |
| H | 13.37330000 | 12.45910000 | 19.90320000 |
| H | 15.11850000 | 10.76850000 | 19.62860000 |
| H | 14.58840000 | 8.53090000  | 18.67300000 |
| H | 12.25140000 | 8.00610000  | 17.97830000 |
| H | 10.46640000 | 9.67270000  | 18.22560000 |
| H | 9.30760000  | 11.58930000 | 24.87630000 |
| H | 10.85140000 | 10.10230000 | 23.59340000 |
| H | 8.15140000  | 13.45540000 | 23.70990000 |
| H | 4.99490000  | 14.18480000 | 17.82860000 |
| H | 2.20320000  | 11.60730000 | 19.55850000 |
| H | 5.11900000  | 10.72110000 | 22.66170000 |
| H | 1.15520000  | 9.01290000  | 22.85130000 |
| H | 2.54380000  | 13.63560000 | 21.37530000 |
| H | 1.63080000  | 16.80470000 | 18.58580000 |
| H | 11.23090000 | 10.46470000 | 21.22620000 |
| H | 11.68990000 | 13.92840000 | 21.55790000 |
| H | 13.18600000 | 15.87400000 | 21.61410000 |
| C | 8.72660000  | 9.37320000  | 14.26700000 |

|   |             |             |             |
|---|-------------|-------------|-------------|
| H | 9.46890000  | 9.89460000  | 14.87810000 |
| C | 7.57290000  | 10.34100000 | 13.91040000 |
| C | 9.46190000  | 8.76360000  | 13.05630000 |
| H | 9.88810000  | 9.54700000  | 12.41850000 |
| H | 10.28960000 | 8.13060000  | 13.40250000 |
| H | 8.80590000  | 8.13610000  | 12.44100000 |
| C | 6.49100000  | 9.61270000  | 13.09000000 |
| H | 5.63290000  | 10.24960000 | 12.86290000 |
| H | 6.89030000  | 9.26840000  | 12.12490000 |
| H | 6.12920000  | 8.73370000  | 13.63620000 |
| C | 8.11540000  | 11.53410000 | 13.18960000 |
| O | 7.22170000  | 12.12140000 | 12.33910000 |
| H | 7.66780000  | 12.91960000 | 12.00950000 |
| O | 9.23290000  | 12.01030000 | 13.31310000 |
| H | 5.76090000  | 11.76450000 | 17.36490000 |
| H | 6.03690000  | 9.72600000  | 15.76910000 |

---

### Species TSFBG

HF energy = -2528.216870846642

Imaginary frequency: 718i

Zero-point correction = 0.846815 (Hartree/Particle)

Thermal correction to Energy = 0.932260

Thermal correction to Enthalpy = 0.933204

Thermal correction to Gibbs Free Energy = 0.711261

Sum of electronic and zero-point Energies = -2527.370056

Sum of electronic and thermal Energies = -2527.284611

Sum of electronic and thermal Enthalpies = -2527.283667

Sum of electronic and thermal Free Energies = -2527.505610

### Coordinates: TSFBG

|    |             |             |             |
|----|-------------|-------------|-------------|
| Ru | 9.11230000  | 12.69960000 | 17.56030000 |
| H  | 7.75340000  | 12.70180000 | 18.79840000 |
| Ru | 6.70170000  | 11.24300000 | 18.65000000 |
| H  | 5.89100000  | 8.38930000  | 15.13560000 |
| Ru | 7.05920000  | 11.73530000 | 15.70380000 |
| Fe | 7.63780000  | 15.97540000 | 22.30500000 |
| S  | 8.44810000  | 10.42640000 | 17.19830000 |
| P  | 10.59630000 | 12.73360000 | 19.36270000 |
| P  | 5.19350000  | 12.41730000 | 20.05250000 |
| F  | 4.89520000  | 8.11580000  | 23.69720000 |
| F  | 2.88820000  | 8.08750000  | 24.36120000 |
| F  | 4.12760000  | 9.73300000  | 24.82980000 |
| F  | 0.22180000  | 10.49020000 | 19.03480000 |
| F  | 0.27180000  | 8.53670000  | 19.84230000 |

|   |             |             |             |
|---|-------------|-------------|-------------|
| F | -0.53570000 | 10.13570000 | 20.97570000 |
| F | -0.04510000 | 14.24320000 | 20.84940000 |
| F | 1.03160000  | 15.61450000 | 22.05220000 |
| F | -0.04100000 | 16.30100000 | 20.36510000 |
| F | 3.81960000  | 17.86120000 | 17.30070000 |
| F | 4.95320000  | 16.36480000 | 16.33570000 |
| F | 2.87460000  | 16.51460000 | 15.96490000 |
| O | 11.51560000 | 12.63570000 | 15.69400000 |
| O | 8.64890000  | 15.71290000 | 17.42640000 |
| O | 7.88730000  | 9.81030000  | 21.08240000 |
| O | 4.74060000  | 8.98520000  | 18.07020000 |
| O | 8.81860000  | 13.56620000 | 13.98040000 |
| O | 4.74310000  | 13.42200000 | 14.69620000 |
| C | 10.59100000 | 12.66120000 | 16.37730000 |
| C | 8.85990000  | 14.58260000 | 17.50690000 |
| C | 7.46190000  | 10.37700000 | 20.17610000 |
| C | 5.48300000  | 9.83170000  | 18.30260000 |
| C | 8.25910000  | 12.87920000 | 14.72470000 |
| C | 5.64780000  | 12.78760000 | 15.02950000 |
| C | 11.55680000 | 14.30260000 | 19.57350000 |
| C | 11.90910000 | 15.04380000 | 18.44040000 |
| C | 12.70740000 | 16.18660000 | 18.56770000 |
| C | 13.15600000 | 16.59110000 | 19.82880000 |
| C | 12.80390000 | 15.85070000 | 20.96120000 |
| C | 12.00760000 | 14.70600000 | 20.83650000 |
| C | 12.02460000 | 11.57830000 | 19.15730000 |
| C | 13.28080000 | 11.86280000 | 19.70910000 |
| C | 14.34040000 | 10.96590000 | 19.53730000 |
| C | 14.15350000 | 9.78240000  | 18.81510000 |
| C | 12.90160000 | 9.49860000  | 18.26340000 |
| C | 11.84000000 | 10.39590000 | 18.43180000 |
| C | 10.06270000 | 12.41160000 | 21.10440000 |
| C | 10.69420000 | 11.32740000 | 21.73950000 |
| C | 10.44650000 | 11.01760000 | 23.07740000 |
| C | 9.53440000  | 11.78540000 | 23.80650000 |
| C | 8.88070000  | 12.84250000 | 23.18180000 |
| C | 9.13040000  | 13.18060000 | 21.83110000 |
| C | 8.32710000  | 14.30660000 | 21.33130000 |
| C | 6.83340000  | 14.34180000 | 21.34230000 |
| C | 6.42380000  | 15.60970000 | 20.71350000 |
| C | 7.62700000  | 16.34950000 | 20.31600000 |
| C | 8.79750000  | 15.55250000 | 20.69920000 |
| C | 7.18500000  | 15.74370000 | 24.28720000 |
| C | 6.42520000  | 16.85280000 | 23.69590000 |
| C | 7.38760000  | 17.81660000 | 23.14470000 |
| C | 8.74230000  | 17.30260000 | 23.39830000 |



|   |             |             |             |
|---|-------------|-------------|-------------|
| C | 8.61670000  | 16.01990000 | 24.09910000 |
| C | 5.92910000  | 13.20190000 | 21.67330000 |
| C | 4.86100000  | 13.62930000 | 22.67760000 |
| C | 3.98720000  | 11.20820000 | 20.81830000 |
| C | 4.33310000  | 10.50540000 | 21.97480000 |
| C | 3.41780000  | 9.60940000  | 22.55550000 |
| C | 3.81120000  | 8.89740000  | 23.82410000 |
| C | 2.16850000  | 9.39230000  | 21.96560000 |
| C | 1.84130000  | 10.07540000 | 20.78370000 |
| C | 0.48900000  | 9.82080000  | 20.16590000 |
| C | 2.75000000  | 10.97160000 | 20.20460000 |
| C | 4.01140000  | 13.76730000 | 19.54920000 |
| C | 2.85700000  | 14.01840000 | 20.29640000 |
| C | 2.00260000  | 15.07600000 | 19.94210000 |
| C | 0.76620000  | 15.31050000 | 20.76920000 |
| C | 2.30740000  | 15.89370000 | 18.84880000 |
| C | 3.47300000  | 15.64370000 | 18.10880000 |
| C | 3.77960000  | 16.56290000 | 16.95330000 |
| C | 4.31580000  | 14.57220000 | 18.44550000 |
| H | 9.81910000  | 15.80910000 | 20.45210000 |
| H | 5.41110000  | 15.90410000 | 20.47730000 |
| H | 5.34530000  | 13.90090000 | 23.63250000 |
| H | 4.31870000  | 14.53590000 | 22.37090000 |
| H | 4.12630000  | 12.85490000 | 22.92170000 |
| H | 6.54210000  | 12.37920000 | 22.14380000 |
| H | 5.36460000  | 17.02020000 | 23.80870000 |
| H | 6.77450000  | 14.98090000 | 24.93030000 |
| H | 9.42760000  | 15.47830000 | 24.56280000 |
| H | 9.65910000  | 17.85240000 | 23.24810000 |
| H | 7.14940000  | 18.80650000 | 22.78420000 |
| H | 7.64570000  | 17.23380000 | 19.69090000 |
| H | 13.77890000 | 17.48100000 | 19.92770000 |
| H | 12.98050000 | 16.76000000 | 17.68090000 |
| H | 11.58190000 | 14.75770000 | 17.43690000 |
| H | 13.47590000 | 12.77470000 | 20.27820000 |
| H | 15.31680000 | 11.19330000 | 19.96400000 |
| H | 14.98240000 | 9.08660000  | 18.67970000 |
| H | 12.74740000 | 8.58130000  | 17.69210000 |
| H | 10.87260000 | 10.13750000 | 17.97510000 |
| H | 9.33210000  | 11.55270000 | 24.85260000 |
| H | 10.95250000 | 10.17300000 | 23.54480000 |
| H | 8.15540000  | 13.44220000 | 23.74510000 |
| H | 5.21070000  | 14.37340000 | 17.83880000 |
| H | 2.47620000  | 11.47910000 | 19.27050000 |
| H | 5.31280000  | 10.63370000 | 22.45350000 |
| H | 1.44840000  | 8.69560000  | 22.41180000 |

|   |             |             |             |
|---|-------------|-------------|-------------|
| H | 2.58920000  | 13.40570000 | 21.16780000 |
| H | 1.64670000  | 16.72280000 | 18.56680000 |
| H | 11.39650000 | 10.67020000 | 21.21150000 |
| H | 11.75140000 | 14.15440000 | 21.74720000 |
| H | 13.15040000 | 16.16400000 | 21.94610000 |
| C | 6.86180000  | 8.52930000  | 14.63990000 |
| H | 7.63020000  | 8.43310000  | 15.41180000 |
| C | 6.92040000  | 9.96180000  | 14.05550000 |
| C | 7.05910000  | 7.41460000  | 13.59690000 |
| H | 8.03250000  | 7.50180000  | 13.10120000 |
| H | 7.02590000  | 6.43640000  | 14.09330000 |
| H | 6.27620000  | 7.41980000  | 12.82880000 |
| C | 5.79230000  | 10.23710000 | 13.05420000 |
| H | 5.80210000  | 11.26800000 | 12.69440000 |
| H | 5.89180000  | 9.58650000  | 12.17480000 |
| H | 4.81590000  | 10.03880000 | 13.51340000 |
| C | 8.29480000  | 10.21360000 | 13.48930000 |
| O | 8.27960000  | 11.01740000 | 12.38660000 |
| H | 9.21120000  | 11.13940000 | 12.13850000 |
| O | 9.33650000  | 9.72260000  | 13.88260000 |
| H | 6.07020000  | 12.07820000 | 17.23120000 |
| H | 6.07880000  | 10.47200000 | 15.41740000 |

---

### Species G

HF energy = -347.012290858

No imaginary frequency

Zero-point correction = 0.147777 (Hartree/Particle)

Thermal correction to Energy = 0.156144

Thermal correction to Enthalpy = 0.157088

Thermal correction to Gibbs Free Energy = 0.114323

Sum of electronic and zero-point Energies = -346.864514

Sum of electronic and thermal Energies = -346.856147

Sum of electronic and thermal Enthalpies = -346.855203

Sum of electronic and thermal Free Energies = -346.897968

### Coordinates: G

|   |             |             |             |
|---|-------------|-------------|-------------|
| H | 14.25080000 | 12.10450000 | 10.31550000 |
| C | 15.86580000 | 12.84060000 | 11.56360000 |
| H | 16.25400000 | 13.81360000 | 11.89300000 |
| C | 14.63330000 | 13.07290000 | 10.67160000 |
| C | 16.97740000 | 12.02780000 | 10.88920000 |
| H | 17.40220000 | 12.54540000 | 10.02010000 |
| H | 17.79920000 | 11.84280000 | 11.59200000 |
| H | 16.60870000 | 11.05080000 | 10.54710000 |
| C | 14.92520000 | 13.94570000 | 9.43110000  |

|   |             |             |             |
|---|-------------|-------------|-------------|
| H | 14.01820000 | 14.09870000 | 8.83680000  |
| H | 15.31250000 | 14.92890000 | 9.72960000  |
| H | 15.67410000 | 13.46790000 | 8.79000000  |
| C | 13.50990000 | 13.70860000 | 11.47610000 |
| O | 12.32120000 | 13.63700000 | 10.82190000 |
| H | 11.67040000 | 14.08360000 | 11.38990000 |
| O | 13.61210000 | 14.23710000 | 12.55860000 |
| H | 15.54290000 | 12.32650000 | 12.47830000 |

---

### Species D'

HF energy = -2527.064042007192

No imaginary frequency

Zero-point correction = 0.829282 (Hartree/Particle)

Thermal correction to Energy = 0.914329

Thermal correction to Enthalpy = 0.915273

Thermal correction to Gibbs Free Energy = 0.693825

Sum of electronic and zero-point Energies = -2526.234760

Sum of electronic and thermal Energies = -2526.149713

Sum of electronic and thermal Enthalpies = -2526.148769

Sum of electronic and thermal Free Energies = -2526.370217

### Coordinates: D'

|    |             |             |             |
|----|-------------|-------------|-------------|
| Ru | 13.97820000 | 10.89120000 | 16.51200000 |
| H  | 12.32790000 | 11.35190000 | 15.84080000 |
| Ru | 12.13270000 | 10.85750000 | 14.12390000 |
| H  | 13.07140000 | 12.28290000 | 13.63460000 |
| Ru | 14.89270000 | 12.15200000 | 14.15630000 |
| Fe | 8.87590000  | 12.59100000 | 18.94460000 |
| S  | 14.30010000 | 9.81640000  | 14.38420000 |
| P  | 12.99870000 | 9.42590000  | 18.05980000 |
| P  | 10.07700000 | 12.06460000 | 14.25660000 |
| F  | 7.10910000  | 7.61180000  | 12.46240000 |
| F  | 5.63930000  | 8.39520000  | 11.16050000 |
| F  | 5.58850000  | 8.87930000  | 13.21650000 |
| F  | 7.35300000  | 12.07450000 | 8.32600000  |
| F  | 7.82600000  | 13.81030000 | 9.43560000  |
| F  | 9.37470000  | 12.55960000 | 8.70930000  |
| F  | 6.58980000  | 15.78530000 | 11.95840000 |
| F  | 5.93650000  | 15.81900000 | 13.97270000 |
| F  | 6.76320000  | 17.55660000 | 13.09830000 |
| F  | 12.68130000 | 17.16010000 | 14.03530000 |
| F  | 11.24850000 | 18.45780000 | 14.88660000 |
| F  | 12.10780000 | 16.93690000 | 16.07000000 |
| O  | 16.70550000 | 10.14510000 | 17.61600000 |
| O  | 13.70110000 | 13.39850000 | 18.21930000 |

|   |             |             |             |
|---|-------------|-------------|-------------|
| O | 10.69910000 | 8.26460000  | 14.87300000 |
| O | 11.59090000 | 10.13310000 | 11.21540000 |
| O | 17.69270000 | 12.17680000 | 15.30220000 |
| O | 14.30480000 | 14.91200000 | 15.30140000 |
| C | 15.67850000 | 10.44500000 | 17.18700000 |
| C | 13.78700000 | 12.43210000 | 17.59290000 |
| C | 11.22920000 | 9.25620000  | 14.63440000 |
| C | 11.84370000 | 10.43010000 | 12.29760000 |
| C | 16.64260000 | 12.15290000 | 14.83000000 |
| C | 14.57270000 | 13.87390000 | 14.87240000 |
| C | 13.12040000 | 9.93320000  | 19.84530000 |
| C | 14.23590000 | 10.66360000 | 20.26850000 |
| C | 14.38760000 | 10.99900000 | 21.61930000 |
| C | 13.42300000 | 10.60540000 | 22.55160000 |
| C | 12.30800000 | 9.87540000  | 22.12940000 |
| C | 12.15630000 | 9.53590000  | 20.77960000 |
| C | 13.87570000 | 7.79710000  | 18.18660000 |
| C | 14.01180000 | 7.11480000  | 19.40100000 |
| C | 14.67550000 | 5.88300000  | 19.43960000 |
| C | 15.20410000 | 5.32960000  | 18.26930000 |
| C | 15.07250000 | 6.01390000  | 17.05740000 |
| C | 14.41400000 | 7.24850000  | 17.01650000 |
| C | 11.21560000 | 8.89450000  | 18.00280000 |
| C | 10.98450000 | 7.50970000  | 17.94820000 |
| C | 9.69170000  | 6.98250000  | 17.95980000 |
| C | 8.59390000  | 7.84540000  | 18.01010000 |
| C | 8.80830000  | 9.21960000  | 18.04490000 |
| C | 10.11150000 | 9.76900000  | 18.05180000 |
| C | 10.15150000 | 11.23890000 | 18.07740000 |
| C | 9.52230000  | 12.11700000 | 17.04660000 |
| C | 9.84060000  | 13.50950000 | 17.40640000 |
| C | 10.65290000 | 13.50510000 | 18.62890000 |
| C | 10.84110000 | 12.11000000 | 19.04520000 |
| C | 6.90350000  | 12.05140000 | 19.02530000 |
| C | 7.05500000  | 13.51220000 | 19.04650000 |
| C | 7.89420000  | 13.86250000 | 20.20070000 |
| C | 8.25900000  | 12.61680000 | 20.89250000 |
| C | 7.65140000  | 11.49800000 | 20.16330000 |
| C | 8.91720000  | 11.65550000 | 15.76320000 |
| C | 7.49970000  | 12.20160000 | 15.60480000 |
| C | 8.96380000  | 11.48730000 | 12.86210000 |
| C | 8.15520000  | 10.35790000 | 13.01560000 |
| C | 7.31980000  | 9.94090000  | 11.96510000 |
| C | 6.43620000  | 8.73920000  | 12.18170000 |
| C | 7.30810000  | 10.63250000 | 10.74770000 |
| C | 8.14290000  | 11.74650000 | 10.58980000 |

|   |             |             |             |
|---|-------------|-------------|-------------|
| C | 8.16710000  | 12.51820000 | 9.29410000  |
| C | 8.97430000  | 12.16890000 | 11.63950000 |
| C | 9.79140000  | 13.90480000 | 14.11380000 |
| C | 8.54570000  | 14.38160000 | 13.68890000 |
| C | 8.29580000  | 15.76140000 | 13.63260000 |
| C | 6.93930000  | 16.23030000 | 13.17630000 |
| C | 9.28870000  | 16.67560000 | 14.00500000 |
| C | 10.53290000 | 16.19550000 | 14.43110000 |
| C | 11.61150000 | 17.16560000 | 14.84490000 |
| C | 10.79100000 | 14.81210000 | 14.47580000 |
| H | 11.47480000 | 11.79240000 | 19.86360000 |
| H | 9.61910000  | 14.38660000 | 16.81580000 |
| H | 6.84940000  | 11.75920000 | 16.38050000 |
| H | 7.43920000  | 13.28750000 | 15.77480000 |
| H | 7.02290000  | 11.97380000 | 14.64590000 |
| H | 8.85510000  | 10.52780000 | 15.78270000 |
| H | 6.50160000  | 14.21140000 | 18.43840000 |
| H | 6.19830000  | 11.50790000 | 18.41640000 |
| H | 7.60350000  | 10.47700000 | 20.51130000 |
| H | 8.74270000  | 12.55350000 | 21.85560000 |
| H | 8.06120000  | 14.86100000 | 20.57660000 |
| H | 11.17570000 | 14.35960000 | 19.04160000 |
| H | 13.54080000 | 10.86680000 | 23.60350000 |
| H | 15.26020000 | 11.56710000 | 21.94300000 |
| H | 15.01340000 | 10.98680000 | 19.57140000 |
| H | 13.61770000 | 7.51080000  | 20.34000000 |
| H | 14.78380000 | 5.35640000  | 20.38710000 |
| H | 15.72130000 | 4.37040000  | 18.30250000 |
| H | 15.48820000 | 5.59170000  | 16.14200000 |
| H | 14.33950000 | 7.76540000  | 16.04860000 |
| H | 7.57980000  | 7.44540000  | 18.01740000 |
| H | 9.54230000  | 5.90410000  | 17.91910000 |
| H | 7.95200000  | 9.90300000  | 18.07880000 |
| H | 11.78430000 | 14.46780000 | 14.79820000 |
| H | 9.62430000  | 13.03900000 | 11.47650000 |
| H | 8.15050000  | 9.77840000  | 13.94820000 |
| H | 6.65760000  | 10.30520000 | 9.92820000  |
| H | 7.73780000  | 13.69930000 | 13.39060000 |
| H | 9.09260000  | 17.75350000 | 13.96150000 |
| H | 11.80390000 | 6.78370000  | 17.88210000 |
| H | 11.26940000 | 8.96360000  | 20.48960000 |
| H | 11.55310000 | 9.56760000  | 22.85250000 |
| C | 15.50760000 | 13.34350000 | 12.21700000 |
| H | 16.44770000 | 13.79790000 | 12.52250000 |
| C | 15.58400000 | 11.99220000 | 11.85040000 |
| C | 14.47920000 | 14.31910000 | 11.69200000 |

|   |             |             |             |
|---|-------------|-------------|-------------|
| H | 14.42000000 | 15.20760000 | 12.33010000 |
| H | 14.77740000 | 14.65880000 | 10.68730000 |
| H | 13.47690000 | 13.88800000 | 11.61510000 |
| C | 14.60660000 | 11.33340000 | 10.90060000 |
| H | 15.01490000 | 11.35470000 | 9.87900000  |
| H | 14.43550000 | 10.28500000 | 11.15400000 |
| H | 13.64980000 | 11.85730000 | 10.88200000 |
| C | 16.93990000 | 11.36600000 | 11.92140000 |
| O | 16.94310000 | 10.08030000 | 11.48140000 |
| H | 17.86230000 | 9.77680000  | 11.56590000 |
| O | 17.96780000 | 11.90830000 | 12.27800000 |

---

### Species TSD'E'

HF energy = -2527.027983157663

Imaginary frequency: 857i

Zero-point correction = 0.828381 (Hartree/Particle)

Thermal correction to Energy = 0.912907

Thermal correction to Enthalpy = 0.913851

Thermal correction to Gibbs Free Energy = 0.695266

Sum of electronic and zero-point Energies = -2526.199602

Sum of electronic and thermal Energies = -2526.115076

Sum of electronic and thermal Enthalpies = -2526.114132

Sum of electronic and thermal Free Energies = -2526.332717

### Coordinates: TSD'E'

|    |             |             |             |
|----|-------------|-------------|-------------|
| Ru | 13.87140000 | 10.80910000 | 16.34560000 |
| H  | 12.21930000 | 11.28310000 | 15.80040000 |
| Ru | 11.94550000 | 10.80840000 | 14.08160000 |
| H  | 13.54210000 | 11.85790000 | 12.44290000 |
| Ru | 14.58550000 | 12.01610000 | 13.80880000 |
| Fe | 8.91410000  | 12.62110000 | 19.05160000 |
| S  | 14.05790000 | 9.66290000  | 14.22900000 |
| P  | 12.93730000 | 9.39410000  | 17.92990000 |
| P  | 9.97670000  | 12.19080000 | 14.30350000 |
| F  | 6.74260000  | 7.92940000  | 12.46700000 |
| F  | 5.25320000  | 8.84010000  | 11.27480000 |
| F  | 5.32950000  | 9.23850000  | 13.34800000 |
| F  | 8.10840000  | 12.08210000 | 8.31470000  |
| F  | 6.68160000  | 13.40670000 | 9.15230000  |
| F  | 8.74390000  | 13.85030000 | 9.28390000  |
| F  | 6.73750000  | 16.18440000 | 12.07370000 |
| F  | 6.00310000  | 16.16740000 | 14.06000000 |
| F  | 6.95410000  | 17.89380000 | 13.29760000 |
| F  | 12.89290000 | 16.92390000 | 14.73490000 |

|   |             |             |             |
|---|-------------|-------------|-------------|
| F | 11.50940000 | 18.47390000 | 15.12100000 |
| F | 11.87440000 | 17.00290000 | 16.59370000 |
| O | 16.61050000 | 9.88600000  | 17.31020000 |
| O | 13.70280000 | 13.36310000 | 17.99740000 |
| O | 10.30640000 | 8.34500000  | 14.78290000 |
| O | 11.24810000 | 10.33980000 | 11.15790000 |
| O | 16.96690000 | 12.68730000 | 15.61460000 |
| O | 13.67210000 | 14.90890000 | 13.97620000 |
| C | 15.58430000 | 10.25660000 | 16.94220000 |
| C | 13.74360000 | 12.37020000 | 17.41220000 |
| C | 10.90520000 | 9.30760000  | 14.56860000 |
| C | 11.56780000 | 10.53390000 | 12.25070000 |
| C | 16.03850000 | 12.36600000 | 15.00750000 |
| C | 14.06480000 | 13.82500000 | 13.88780000 |
| C | 13.15760000 | 9.90830000  | 19.69770000 |
| C | 14.28920000 | 10.64500000 | 20.06340000 |
| C | 14.50700000 | 10.98080000 | 21.40480000 |
| C | 13.59350000 | 10.58030000 | 22.38480000 |
| C | 12.46320000 | 9.84300000  | 22.01990000 |
| C | 12.24450000 | 9.50370000  | 20.67930000 |
| C | 13.78130000 | 7.74890000  | 18.00570000 |
| C | 14.05850000 | 7.11070000  | 19.21990000 |
| C | 14.68350000 | 5.85780000  | 19.22510000 |
| C | 15.03330000 | 5.23900000  | 18.02150000 |
| C | 14.76120000 | 5.87880000  | 16.80820000 |
| C | 14.14120000 | 7.13310000  | 16.80000000 |
| C | 11.14700000 | 8.91930000  | 17.93990000 |
| C | 10.87840000 | 7.53970000  | 17.89090000 |
| C | 9.57440000  | 7.04530000  | 17.93760000 |
| C | 8.50020000  | 7.93600000  | 18.01740000 |
| C | 8.75100000  | 9.30330000  | 18.05600000 |
| C | 10.06770000 | 9.82060000  | 18.03460000 |
| C | 10.14290000 | 11.28790000 | 18.09110000 |
| C | 9.48660000  | 12.20520000 | 17.11360000 |
| C | 9.83160000  | 13.58090000 | 17.50960000 |
| C | 10.68840000 | 13.52860000 | 18.70020000 |
| C | 10.87670000 | 12.11920000 | 19.06250000 |
| C | 6.93950000  | 12.09790000 | 19.18740000 |
| C | 7.10700000  | 13.55550000 | 19.24730000 |
| C | 7.99070000  | 13.86230000 | 20.38030000 |
| C | 8.36710000  | 12.59270000 | 21.02070000 |
| C | 7.72250000  | 11.50280000 | 20.28000000 |
| C | 8.83470000  | 11.79700000 | 15.83500000 |
| C | 7.44280000  | 12.41490000 | 15.71760000 |
| C | 8.79960000  | 11.70280000 | 12.92760000 |
| C | 7.94510000  | 10.60850000 | 13.07950000 |

|   |             |             |             |
|---|-------------|-------------|-------------|
| C | 7.04970000  | 10.26410000 | 12.05100000 |
| C | 6.11710000  | 9.10030000  | 12.26620000 |
| C | 7.02770000  | 10.99340000 | 10.85810000 |
| C | 7.91360000  | 12.07070000 | 10.69770000 |
| C | 7.87310000  | 12.83710000 | 9.39920000  |
| C | 8.80350000  | 12.41910000 | 11.72240000 |
| C | 9.74980000  | 14.04520000 | 14.24430000 |
| C | 8.54680000  | 14.60530000 | 13.80020000 |
| C | 8.36860000  | 15.99780000 | 13.81140000 |
| C | 7.05880000  | 16.55790000 | 13.32330000 |
| C | 9.38560000  | 16.84110000 | 14.27710000 |
| C | 10.58210000 | 16.27610000 | 14.73260000 |
| C | 11.68660000 | 17.15190000 | 15.26960000 |
| C | 10.76690000 | 14.88120000 | 14.71110000 |
| H | 11.53390000 | 11.76860000 | 19.84740000 |
| H | 9.58990000  | 14.48110000 | 16.96250000 |
| H | 6.79810000  | 12.01940000 | 16.52260000 |
| H | 7.44200000  | 13.50500000 | 15.86660000 |
| H | 6.92230000  | 12.19650000 | 14.77930000 |
| H | 8.72130000  | 10.67410000 | 15.83100000 |
| H | 6.54040000  | 14.27840000 | 18.67990000 |
| H | 6.20630000  | 11.57980000 | 18.58910000 |
| H | 7.67530000  | 10.47210000 | 20.59850000 |
| H | 8.88380000  | 12.49570000 | 21.96350000 |
| H | 8.18120000  | 14.84740000 | 20.77990000 |
| H | 11.23170000 | 14.36550000 | 19.12170000 |
| H | 13.76320000 | 10.84230000 | 23.42970000 |
| H | 15.39110000 | 11.55500000 | 21.68450000 |
| H | 15.02810000 | 10.97350000 | 19.32750000 |
| H | 13.80790000 | 7.55640000  | 20.18580000 |
| H | 14.90110000 | 5.36630000  | 20.17290000 |
| H | 15.52050000 | 4.26340000  | 18.02830000 |
| H | 15.03730000 | 5.40520000  | 15.86550000 |
| H | 13.95190000 | 7.61150000  | 15.82810000 |
| H | 7.47640000  | 7.56190000  | 18.04490000 |
| H | 9.39610000  | 5.97110000  | 17.89820000 |
| H | 7.91330000  | 10.00860000 | 18.11490000 |
| H | 11.72030000 | 14.47000000 | 15.07050000 |
| H | 9.49730000  | 13.25550000 | 11.56510000 |
| H | 7.94990000  | 9.99860000  | 13.99270000 |
| H | 6.33330000  | 10.73180000 | 10.05060000 |
| H | 7.71690000  | 13.98210000 | 13.44140000 |
| H | 9.24430000  | 17.92810000 | 14.28610000 |
| H | 11.67600000 | 6.79200000  | 17.80470000 |
| H | 11.34720000 | 8.92630000  | 20.43340000 |
| H | 11.74820000 | 9.53010000  | 22.78070000 |



|   |             |             |             |
|---|-------------|-------------|-------------|
| C | 14.81270000 | 11.84740000 | 11.44260000 |
| H | 14.44550000 | 12.76290000 | 10.98010000 |
| C | 16.06900000 | 12.01390000 | 12.11470000 |
| C | 14.50710000 | 10.57860000 | 10.66800000 |
| H | 13.51060000 | 10.61240000 | 10.22260000 |
| H | 15.23590000 | 10.49010000 | 9.84930000  |
| H | 14.58170000 | 9.67790000  | 11.28390000 |
| C | 17.08060000 | 10.87530000 | 12.17940000 |
| H | 17.64800000 | 10.81700000 | 11.23710000 |
| H | 17.80310000 | 11.02750000 | 12.98460000 |
| H | 16.58760000 | 9.91350000  | 12.34030000 |
| C | 16.63180000 | 13.40160000 | 12.02740000 |
| O | 17.90780000 | 13.47360000 | 12.48550000 |
| H | 18.16800000 | 14.40620000 | 12.39980000 |
| O | 16.06650000 | 14.38140000 | 11.58360000 |

---

### Species E'

HF energy = -2527.038633265699

No imaginary frequency

Zero-point correction = 0.831531 (Hartree/Particle)

Thermal correction to Energy = 0.916458

Thermal correction to Enthalpy = 0.917402

Thermal correction to Gibbs Free Energy = 0.697565

Sum of electronic and zero-point Energies = -2526.207102

Sum of electronic and thermal Energies = -2526.122176

Sum of electronic and thermal Enthalpies = -2526.121231

Sum of electronic and thermal Free Energies = -2526.341068

### Coordinates: E'

|    |             |             |             |
|----|-------------|-------------|-------------|
| Ru | 13.80450000 | 10.89350000 | 16.33260000 |
| H  | 12.12450000 | 11.27260000 | 15.83540000 |
| Ru | 11.87990000 | 10.84610000 | 14.09060000 |
| H  | 13.90510000 | 11.59870000 | 11.88680000 |
| Ru | 14.49970000 | 12.01150000 | 13.67210000 |
| Fe | 8.80930000  | 12.56050000 | 19.05610000 |
| S  | 13.99980000 | 9.70520000  | 14.25520000 |
| P  | 12.94300000 | 9.46780000  | 17.93310000 |
| P  | 9.93040000  | 12.19170000 | 14.32150000 |
| F  | 6.83980000  | 7.96060000  | 12.15430000 |
| F  | 5.26070000  | 8.93130000  | 11.13810000 |
| F  | 5.43040000  | 9.11550000  | 13.23460000 |
| F  | 7.94430000  | 12.49790000 | 8.37390000  |
| F  | 6.47310000  | 13.67680000 | 9.34110000  |
| F  | 8.51290000  | 14.21080000 | 9.47480000  |
| F  | 6.63360000  | 16.35410000 | 12.45340000 |

|   |             |             |             |
|---|-------------|-------------|-------------|
| F | 6.05260000  | 16.26020000 | 14.48780000 |
| F | 6.98510000  | 17.99940000 | 13.73290000 |
| F | 13.03340000 | 16.71850000 | 14.64070000 |
| F | 11.77940000 | 18.39340000 | 14.93220000 |
| F | 12.09710000 | 17.02900000 | 16.51630000 |
| O | 16.61130000 | 10.10060000 | 17.24530000 |
| O | 13.53010000 | 13.44100000 | 17.98460000 |
| O | 10.25030000 | 8.30310000  | 14.56730000 |
| O | 11.44690000 | 10.74040000 | 11.08150000 |
| O | 16.57260000 | 13.08700000 | 15.59070000 |
| O | 13.51170000 | 14.87620000 | 13.32460000 |
| C | 15.56130000 | 10.41660000 | 16.90030000 |
| C | 13.61270000 | 12.44910000 | 17.40490000 |
| C | 10.83620000 | 9.29120000  | 14.44500000 |
| C | 11.65060000 | 10.79310000 | 12.21990000 |
| C | 15.75080000 | 12.61790000 | 14.92260000 |
| C | 13.90960000 | 13.79760000 | 13.43020000 |
| C | 13.15670000 | 10.00330000 | 19.68870000 |
| C | 14.26140000 | 10.78430000 | 20.04550000 |
| C | 14.47370000 | 11.13100000 | 21.38460000 |
| C | 13.58250000 | 10.69590000 | 22.37080000 |
| C | 12.48020000 | 9.91360000  | 22.01470000 |
| C | 12.26620000 | 9.56360000  | 20.67600000 |
| C | 13.85280000 | 7.86400000  | 18.00270000 |
| C | 14.20950000 | 7.26890000  | 19.21830000 |
| C | 14.87910000 | 6.03930000  | 19.22570000 |
| C | 15.19400000 | 5.40020000  | 18.02310000 |
| C | 14.84150000 | 5.99620000  | 16.80830000 |
| C | 14.17670000 | 7.22720000  | 16.79720000 |
| C | 11.17600000 | 8.94100000  | 17.93550000 |
| C | 10.95430000 | 7.55300000  | 17.87190000 |
| C | 9.66790000  | 7.01460000  | 17.90380000 |
| C | 8.56340000  | 7.86790000  | 17.98350000 |
| C | 8.76760000  | 9.24230000  | 18.03900000 |
| C | 10.06580000 | 9.80460000  | 18.03100000 |
| C | 10.08960000 | 11.27310000 | 18.10020000 |
| C | 9.41100000  | 12.17350000 | 17.12170000 |
| C | 9.71060000  | 13.55730000 | 17.52720000 |
| C | 10.55580000 | 13.52670000 | 18.72690000 |
| C | 10.78620000 | 12.12240000 | 19.08390000 |
| C | 6.85020000  | 11.97710000 | 19.16440000 |
| C | 6.97290000  | 13.43850000 | 19.23890000 |
| C | 7.83420000  | 13.76190000 | 20.38440000 |
| C | 8.24120000  | 12.49870000 | 21.01860000 |
| C | 7.63810000  | 11.39650000 | 20.26150000 |
| C | 8.78400000  | 11.75090000 | 15.83510000 |

|   |             |             |             |
|---|-------------|-------------|-------------|
| C | 7.36890000  | 12.31200000 | 15.71350000 |
| C | 8.75200000  | 11.77790000 | 12.92540000 |
| C | 7.95240000  | 10.63450000 | 13.00360000 |
| C | 7.04500000  | 10.33710000 | 11.97120000 |
| C | 6.16690000  | 9.12060000  | 12.10850000 |
| C | 6.96330000  | 11.15910000 | 10.84250000 |
| C | 7.79920000  | 12.28280000 | 10.75140000 |
| C | 7.69570000  | 13.14830000 | 9.52130000  |
| C | 8.69920000  | 12.58630000 | 11.78250000 |
| C | 9.73670000  | 14.05210000 | 14.32880000 |
| C | 8.52090000  | 14.65510000 | 13.99190000 |
| C | 8.38760000  | 16.05200000 | 14.04890000 |
| C | 7.05850000  | 16.66170000 | 13.68970000 |
| C | 9.46910000  | 16.85440000 | 14.43480000 |
| C | 10.68500000 | 16.24520000 | 14.76700000 |
| C | 11.86540000 | 17.08060000 | 15.19230000 |
| C | 10.81750000 | 14.84540000 | 14.71910000 |
| H | 11.44530000 | 11.78930000 | 19.87390000 |
| H | 9.45250000  | 14.45110000 | 16.97690000 |
| H | 6.72640000  | 11.85330000 | 16.48560000 |
| H | 7.31770000  | 13.39330000 | 15.90900000 |
| H | 6.87660000  | 12.11130000 | 14.75610000 |
| H | 8.71570000  | 10.62350000 | 15.82050000 |
| H | 6.39150000  | 14.14890000 | 18.67060000 |
| H | 6.14120000  | 11.44230000 | 18.55160000 |
| H | 7.61770000  | 10.36230000 | 20.57090000 |
| H | 8.74930000  | 12.40910000 | 21.96650000 |
| H | 7.99010000  | 14.74860000 | 20.79440000 |
| H | 11.06710000 | 14.37820000 | 19.15800000 |
| H | 13.74800000 | 10.96680000 | 23.41450000 |
| H | 15.33570000 | 11.74060000 | 21.65840000 |
| H | 14.98190000 | 11.13920000 | 19.30330000 |
| H | 13.98880000 | 7.73070000  | 20.18410000 |
| H | 15.15790000 | 5.58150000  | 20.17440000 |
| H | 15.71580000 | 4.44240000  | 18.03170000 |
| H | 15.08820000 | 5.50610000  | 15.86560000 |
| H | 13.92110000 | 7.66920000  | 15.82270000 |
| H | 7.55250000  | 7.45910000  | 17.99620000 |
| H | 9.52590000  | 5.93550000  | 17.84980000 |
| H | 7.90590000  | 9.91830000  | 18.09660000 |
| H | 11.77990000 | 14.39040000 | 14.99040000 |
| H | 9.35690000  | 13.45870000 | 11.67590000 |
| H | 8.01390000  | 9.94870000  | 13.85950000 |
| H | 6.26110000  | 10.93300000 | 10.03130000 |
| H | 7.65110000  | 14.06210000 | 13.67890000 |
| H | 9.36480000  | 17.94470000 | 14.47590000 |

|   |             |             |             |
|---|-------------|-------------|-------------|
| H | 11.77670000 | 6.83280000  | 17.78620000 |
| H | 11.39060000 | 8.95070000  | 20.43580000 |
| H | 11.78290000 | 9.57370000  | 22.78070000 |
| C | 14.92280000 | 11.49420000 | 11.29470000 |
| H | 14.79610000 | 12.32340000 | 10.59090000 |
| C | 16.09630000 | 11.76360000 | 12.19330000 |
| C | 14.82500000 | 10.12940000 | 10.60620000 |
| H | 13.91040000 | 10.07170000 | 10.00660000 |
| H | 15.68270000 | 9.99200000  | 9.93590000  |
| H | 14.81400000 | 9.30350000  | 11.32450000 |
| C | 17.09420000 | 10.63980000 | 12.46520000 |
| H | 17.72310000 | 10.45270000 | 11.57950000 |
| H | 17.76500000 | 10.90220000 | 13.28710000 |
| H | 16.58760000 | 9.70710000  | 12.72490000 |
| C | 16.71820000 | 13.10220000 | 11.93010000 |
| O | 17.93030000 | 13.24830000 | 12.52730000 |
| H | 18.21510000 | 14.15570000 | 12.32630000 |
| O | 16.23990000 | 14.00020000 | 11.26260000 |

---

### Species F'

HF energy = -2528.229692793709

No imaginary frequency

Zero-point correction = 0.848836 (Hartree/Particle)

Thermal correction to Energy = 0.934170

Thermal correction to Enthalpy = 0.935114

Thermal correction to Gibbs Free Energy = 0.712826

Sum of electronic and zero-point Energies = -2527.380857

Sum of electronic and thermal Energies = -2527.295523

Sum of electronic and thermal Enthalpies = -2527.294578

Sum of electronic and thermal Free Energies = -2527.516867

### Coordinates: F'

|    |             |             |             |
|----|-------------|-------------|-------------|
| Ru | 13.82430000 | 10.92640000 | 16.40540000 |
| H  | 12.10700000 | 11.31940000 | 15.89320000 |
| Ru | 11.81340000 | 10.89080000 | 14.17000000 |
| H  | 16.35980000 | 11.65370000 | 10.89080000 |
| Ru | 14.62420000 | 11.89820000 | 13.66830000 |
| Fe | 8.76480000  | 12.53880000 | 19.10200000 |
| S  | 13.90660000 | 9.69510000  | 14.36890000 |
| P  | 12.93220000 | 9.47550000  | 17.98280000 |
| P  | 9.85230000  | 12.19830000 | 14.37020000 |
| F  | 6.72350000  | 8.01660000  | 12.23540000 |
| F  | 5.19890000  | 8.97300000  | 11.12610000 |
| F  | 5.28250000  | 9.21450000  | 13.22320000 |

|   |             |             |             |
|---|-------------|-------------|-------------|
| F | 7.94530000  | 12.51940000 | 8.40540000  |
| F | 6.47340000  | 13.71830000 | 9.34840000  |
| F | 8.51760000  | 14.22900000 | 9.51080000  |
| F | 6.65020000  | 16.41820000 | 12.52990000 |
| F | 6.08470000  | 16.34550000 | 14.56970000 |
| F | 7.04990000  | 18.06080000 | 13.79950000 |
| F | 13.02570000 | 16.45560000 | 15.50820000 |
| F | 12.21990000 | 18.02070000 | 14.33640000 |
| F | 11.62780000 | 17.79340000 | 16.35880000 |
| O | 16.59400000 | 10.21310000 | 17.45230000 |
| O | 13.48750000 | 13.42010000 | 18.14310000 |
| O | 10.17810000 | 8.36950000  | 14.77170000 |
| O | 11.48840000 | 10.54140000 | 11.15880000 |
| O | 15.82970000 | 13.83000000 | 15.74840000 |
| O | 14.37450000 | 14.33490000 | 11.87690000 |
| C | 15.56310000 | 10.48730000 | 17.02650000 |
| C | 13.61300000 | 12.46040000 | 17.52170000 |
| C | 10.79680000 | 9.32140000  | 14.58410000 |
| C | 11.60950000 | 10.66570000 | 12.29360000 |
| C | 15.33360000 | 13.00080000 | 15.11170000 |
| C | 14.55690000 | 13.43020000 | 12.56170000 |
| C | 13.10920000 | 10.00740000 | 19.74630000 |
| C | 14.21550000 | 10.77210000 | 20.13230000 |
| C | 14.40140000 | 11.11220000 | 21.47720000 |
| C | 13.48250000 | 10.68640000 | 22.44140000 |
| C | 12.37880000 | 9.91940000  | 22.05700000 |
| C | 12.19150000 | 9.57620000  | 20.71270000 |
| C | 13.84290000 | 7.87190000  | 18.08120000 |
| C | 14.11950000 | 7.25650000  | 19.30830000 |
| C | 14.79830000 | 6.03280000  | 19.34190000 |
| C | 15.20300000 | 5.41740000  | 18.15360000 |
| C | 14.92950000 | 6.03190000  | 16.92810000 |
| C | 14.25530000 | 7.25760000  | 16.89210000 |
| C | 11.16060000 | 8.94650000  | 17.95780000 |
| C | 10.94860000 | 7.55760000  | 17.88660000 |
| C | 9.66620000  | 7.00900000  | 17.91360000 |
| C | 8.55560000  | 7.85370000  | 17.99660000 |
| C | 8.74980000  | 9.22950000  | 18.05560000 |
| C | 10.04350000 | 9.80260000  | 18.05160000 |
| C | 10.05020000 | 11.27150000 | 18.12520000 |
| C | 9.34960000  | 12.17250000 | 17.16140000 |
| C | 9.64040000  | 13.55740000 | 17.57180000 |
| C | 10.49790000 | 13.52760000 | 18.76190000 |
| C | 10.74680000 | 12.12340000 | 19.10660000 |
| C | 6.81270000  | 11.93630000 | 19.22620000 |
| C | 6.92290000  | 13.39820000 | 19.31300000 |

|   |             |             |             |
|---|-------------|-------------|-------------|
| C | 7.79400000  | 13.71890000 | 20.45200000 |
| C | 8.21950000  | 12.45350000 | 21.06970000 |
| C | 7.61800000  | 11.35280000 | 20.30900000 |
| C | 8.70470000  | 11.76380000 | 15.87920000 |
| C | 7.29880000  | 12.34920000 | 15.76640000 |
| C | 8.67910000  | 11.80070000 | 12.96810000 |
| C | 7.85670000  | 10.67370000 | 13.04240000 |
| C | 6.96200000  | 10.38380000 | 11.99710000 |
| C | 6.06390000  | 9.18100000  | 12.12860000 |
| C | 6.90880000  | 11.20190000 | 10.86380000 |
| C | 7.76290000  | 12.31260000 | 10.78030000 |
| C | 7.68710000  | 13.17680000 | 9.54630000  |
| C | 8.65380000  | 12.60580000 | 11.82190000 |
| C | 9.72170000  | 14.05570000 | 14.37320000 |
| C | 8.51480000  | 14.68390000 | 14.05220000 |
| C | 8.40990000  | 16.08360000 | 14.11150000 |
| C | 7.09170000  | 16.72200000 | 13.76130000 |
| C | 9.51010000  | 16.85800000 | 14.49490000 |
| C | 10.71900000 | 16.22200000 | 14.81530000 |
| C | 11.87620000 | 17.09060000 | 15.24020000 |
| C | 10.83020000 | 14.82390000 | 14.74550000 |
| H | 11.41890000 | 11.79520000 | 19.88820000 |
| H | 9.37050000  | 14.45110000 | 17.02690000 |
| H | 6.65650000  | 11.91180000 | 16.55150000 |
| H | 7.26710000  | 13.43320000 | 15.95020000 |
| H | 6.79330000  | 12.14590000 | 14.81640000 |
| H | 8.61560000  | 10.63860000 | 15.86250000 |
| H | 6.32770000  | 14.10860000 | 18.75910000 |
| H | 6.10040000  | 11.40060000 | 18.61820000 |
| H | 7.60990000  | 10.31570000 | 20.60950000 |
| H | 8.73860000  | 12.36000000 | 22.01150000 |
| H | 7.94490000  | 14.70320000 | 20.87010000 |
| H | 11.00650000 | 14.38060000 | 19.19440000 |
| H | 13.62750000 | 10.95190000 | 23.48950000 |
| H | 15.26540000 | 11.70960000 | 21.77190000 |
| H | 14.95980000 | 11.12010000 | 19.41050000 |
| H | 13.82820000 | 7.69820000  | 20.26470000 |
| H | 15.01520000 | 5.56100000  | 20.30000000 |
| H | 15.73330000 | 4.46470000  | 18.18250000 |
| H | 15.24650000 | 5.56140000  | 15.99640000 |
| H | 14.06510000 | 7.71250000  | 15.90870000 |
| H | 7.54770000  | 7.43740000  | 18.01040000 |
| H | 9.53270000  | 5.92900000  | 17.85660000 |
| H | 7.88250000  | 9.89830000  | 18.11860000 |
| H | 11.78930000 | 14.34230000 | 14.98330000 |
| H | 9.32500000  | 13.46890000 | 11.72170000 |

|   |             |             |             |
|---|-------------|-------------|-------------|
| H | 7.88700000  | 9.99670000  | 13.90610000 |
| H | 6.21420000  | 10.98320000 | 10.04370000 |
| H | 7.62940000  | 14.10960000 | 13.74780000 |
| H | 9.43610000  | 17.95140000 | 14.54620000 |
| H | 11.77710000 | 6.84420000  | 17.79780000 |
| H | 11.31430000 | 8.97440000  | 20.45210000 |
| H | 11.65990000 | 9.58590000  | 22.80570000 |
| C | 16.80290000 | 10.88280000 | 11.52890000 |
| H | 17.87350000 | 10.85650000 | 11.25620000 |
| C | 16.72920000 | 11.33670000 | 13.01250000 |
| C | 16.20860000 | 9.51340000  | 11.18050000 |
| H | 16.32640000 | 9.32100000  | 10.10600000 |
| H | 16.70880000 | 8.69750000  | 11.71630000 |
| H | 15.13890000 | 9.46010000  | 11.41570000 |
| C | 17.32440000 | 10.26290000 | 13.93580000 |
| H | 18.34400000 | 10.00050000 | 13.60620000 |
| H | 17.40500000 | 10.60350000 | 14.96910000 |
| H | 16.72660000 | 9.34700000  | 13.91800000 |
| C | 17.48600000 | 12.63330000 | 13.10660000 |
| O | 18.22190000 | 12.76830000 | 14.24990000 |
| H | 18.59520000 | 13.66490000 | 14.20830000 |
| O | 17.49240000 | 13.52530000 | 12.27740000 |
| H | 12.79390000 | 12.31300000 | 13.83270000 |
| H | 14.37660000 | 11.28150000 | 12.18280000 |

---

### Species TSF'BG

HF energy = -2528.215830924713

Imaginary frequency: 635i

Zero-point correction = 0.846886 (Hartree/Particle)

Thermal correction to Energy = 0.932323

Thermal correction to Enthalpy = 0.933267

Thermal correction to Gibbs Free Energy = 0.711550

Sum of electronic and zero-point Energies = -2527.368945

Sum of electronic and thermal Energies = -2527.283508

Sum of electronic and thermal Enthalpies = -2527.282564

Sum of electronic and thermal Free Energies = -2527.504281

### Coordinates: TSF'BG

|    |             |             |             |
|----|-------------|-------------|-------------|
| Ru | 13.91000000 | 10.86470000 | 16.69750000 |
| H  | 12.21920000 | 11.23290000 | 16.08250000 |
| Ru | 12.01230000 | 10.75360000 | 14.35570000 |
| H  | 16.78030000 | 13.32840000 | 11.81680000 |
| Ru | 14.77970000 | 11.90900000 | 14.10570000 |
| Fe | 8.77860000  | 12.68030000 | 19.09130000 |

|   |             |             |             |
|---|-------------|-------------|-------------|
| S | 14.13250000 | 9.63120000  | 14.65250000 |
| P | 12.90280000 | 9.48690000  | 18.28960000 |
| P | 10.01940000 | 12.03510000 | 14.42580000 |
| F | 6.87880000  | 7.72370000  | 12.57310000 |
| F | 5.44530000  | 8.59280000  | 11.28490000 |
| F | 5.42330000  | 9.05430000  | 13.34640000 |
| F | 8.43160000  | 11.75750000 | 8.36590000  |
| F | 6.96200000  | 13.09910000 | 9.09650000  |
| F | 9.01410000  | 13.55590000 | 9.31310000  |
| F | 6.98530000  | 16.05490000 | 11.97620000 |
| F | 6.21410000  | 16.14310000 | 13.94690000 |
| F | 7.24770000  | 17.80060000 | 13.13910000 |
| F | 12.92010000 | 16.41140000 | 15.79600000 |
| F | 12.43550000 | 17.76680000 | 14.24280000 |
| F | 11.45270000 | 17.89390000 | 16.11600000 |
| O | 16.60900000 | 10.02250000 | 17.82010000 |
| O | 13.63590000 | 13.47580000 | 18.25270000 |
| O | 10.42700000 | 8.20860000  | 14.98030000 |
| O | 11.87590000 | 10.29850000 | 11.34650000 |
| O | 17.00730000 | 12.77990000 | 16.03690000 |
| O | 14.58010000 | 14.84980000 | 13.38080000 |
| C | 15.60010000 | 10.36590000 | 17.38530000 |
| C | 13.72480000 | 12.46540000 | 17.70550000 |
| C | 11.02210000 | 9.17200000  | 14.77760000 |
| C | 11.91340000 | 10.46280000 | 12.48370000 |
| C | 16.12960000 | 12.36900000 | 15.40900000 |
| C | 14.71080000 | 13.73810000 | 13.66190000 |
| C | 13.01750000 | 10.07980000 | 20.03980000 |
| C | 14.13090000 | 10.82830000 | 20.43690000 |
| C | 14.27500000 | 11.21970000 | 21.77300000 |
| C | 13.30620000 | 10.86300000 | 22.71610000 |
| C | 12.19420000 | 10.11420000 | 22.31980000 |
| C | 12.04860000 | 9.71920000  | 20.98450000 |
| C | 13.76970000 | 7.86650000  | 18.48970000 |
| C | 13.90780000 | 7.25300000  | 19.74070000 |
| C | 14.55880000 | 6.01860000  | 19.84660000 |
| C | 15.07360000 | 5.39220000  | 18.70750000 |
| C | 14.93900000 | 6.00600000  | 17.45870000 |
| C | 14.29230000 | 7.24230000  | 17.35020000 |
| C | 11.12410000 | 8.98180000  | 18.21340000 |
| C | 10.88700000 | 7.59590000  | 18.18140000 |
| C | 9.59290000  | 7.07410000  | 18.18740000 |
| C | 8.49800000  | 7.94260000  | 18.20780000 |
| C | 8.71810000  | 9.31580000  | 18.21980000 |
| C | 10.02300000 | 9.86230000  | 18.23220000 |
| C | 10.06270000 | 11.33220000 | 18.23180000 |



|   |             |             |             |
|---|-------------|-------------|-------------|
| C | 9.41610000  | 12.19170000 | 17.19500000 |
| C | 9.72470000  | 13.59120000 | 17.53660000 |
| C | 10.54480000 | 13.61020000 | 18.75320000 |
| C | 10.74990000 | 12.22290000 | 19.18440000 |
| C | 6.80890000  | 12.13280000 | 19.18230000 |
| C | 6.95430000  | 13.59420000 | 19.19710000 |
| C | 7.79700000  | 13.95280000 | 20.34620000 |
| C | 8.16980000  | 12.71160000 | 21.04200000 |
| C | 7.56390000  | 11.58760000 | 20.31980000 |
| C | 8.81010000  | 11.72020000 | 15.91570000 |
| C | 7.42750000  | 12.33510000 | 15.70900000 |
| C | 8.90460000  | 11.51530000 | 13.01470000 |
| C | 8.04600000  | 10.42320000 | 13.15970000 |
| C | 7.20060000  | 10.04550000 | 12.10120000 |
| C | 6.26090000  | 8.88550000  | 12.30740000 |
| C | 7.23300000  | 10.73910000 | 10.88730000 |
| C | 8.12380000  | 11.81360000 | 10.73630000 |
| C | 8.14210000  | 12.54200000 | 9.41550000  |
| C | 8.96450000  | 12.19490000 | 11.79060000 |
| C | 9.87170000  | 13.88730000 | 14.28270000 |
| C | 8.69740000  | 14.47310000 | 13.80120000 |
| C | 8.57480000  | 15.87190000 | 13.75110000 |
| C | 7.29720000  | 16.46380000 | 13.21690000 |
| C | 9.61830000  | 16.68840000 | 14.19960000 |
| C | 10.78880000 | 16.09510000 | 14.69640000 |
| C | 11.87900000 | 17.00840000 | 15.19810000 |
| C | 10.92570000 | 14.69770000 | 14.71980000 |
| H | 11.38890000 | 11.92500000 | 20.00510000 |
| H | 9.48790000  | 14.45860000 | 16.93690000 |
| H | 6.74880000  | 11.98540000 | 16.50740000 |
| H | 7.42440000  | 13.43130000 | 15.79920000 |
| H | 6.94490000  | 12.06650000 | 14.76340000 |
| H | 8.69090000  | 10.59880000 | 15.96380000 |
| H | 6.39560000  | 14.28880000 | 18.58800000 |
| H | 6.10250000  | 11.58350000 | 18.57970000 |
| H | 7.51940000  | 10.56820000 | 20.67320000 |
| H | 8.65650000  | 12.65490000 | 22.00390000 |
| H | 7.96020000  | 14.95380000 | 20.71760000 |
| H | 11.05750000 | 14.47580000 | 19.15440000 |
| H | 13.41870000 | 11.16810000 | 23.75730000 |
| H | 15.14530000 | 11.80280000 | 22.07760000 |
| H | 14.91170000 | 11.12340000 | 19.73030000 |
| H | 13.52590000 | 7.70490000  | 20.65950000 |
| H | 14.66810000 | 5.54680000  | 20.82280000 |
| H | 15.58200000 | 4.43100000  | 18.79310000 |
| H | 15.34370000 | 5.52710000  | 16.56590000 |

|   |             |             |             |
|---|-------------|-------------|-------------|
| H | 14.21400000 | 7.69830000  | 16.35220000 |
| H | 7.48190000  | 7.54660000  | 18.20880000 |
| H | 9.43910000  | 5.99550000  | 18.16330000 |
| H | 7.86340000  | 10.00320000 | 18.23010000 |
| H | 11.86160000 | 14.25030000 | 15.08310000 |
| H | 9.66360000  | 13.02790000 | 11.64060000 |
| H | 8.00880000  | 9.84130000  | 14.09000000 |
| H | 6.57700000  | 10.45170000 | 10.05660000 |
| H | 7.84980000  | 13.86660000 | 13.45460000 |
| H | 9.52960000  | 17.78130000 | 14.16600000 |
| H | 11.70340000 | 6.86450000  | 18.13940000 |
| H | 11.16320000 | 9.13480000  | 20.71310000 |
| H | 11.43620000 | 9.83540000  | 23.05200000 |
| C | 16.54350000 | 12.39570000 | 11.29570000 |
| H | 17.46390000 | 12.12870000 | 10.75060000 |
| C | 16.31280000 | 11.28170000 | 12.33650000 |
| C | 15.42690000 | 12.63460000 | 10.27430000 |
| H | 15.71320000 | 13.44840000 | 9.59640000  |
| H | 15.22830000 | 11.74910000 | 9.65860000  |
| H | 14.48420000 | 12.92510000 | 10.75620000 |
| C | 15.99770000 | 9.92330000  | 11.69000000 |
| H | 16.83150000 | 9.63360000  | 11.03040000 |
| H | 15.86930000 | 9.13870000  | 12.43620000 |
| H | 15.08880000 | 9.96660000  | 11.08110000 |
| C | 17.53300000 | 11.20000000 | 13.21790000 |
| O | 17.68260000 | 9.99930000  | 13.85350000 |
| H | 18.49550000 | 10.09000000 | 14.37800000 |
| O | 18.37960000 | 12.06460000 | 13.33420000 |
| H | 12.95600000 | 12.20800000 | 14.04220000 |
| H | 14.63740000 | 11.62590000 | 12.51600000 |

---

## Crystallographic refinement

The crystal of **6** was found to be twinned and was solved using the JANA2006 program.<sup>S1</sup> It was refined as an inversion twin, yielding the absolute configuration and the absolute structure,  $x(u)=0.05(3)$ . Two large non-solvent hydrogen atoms with large thermal displacement parameters, due to disorder on the cyclopentadienyl rings. The structure contains voids of 259 Å<sup>3</sup>. This is due to the packing of the molecules in the solid state. There is no rest electron density to account for any solvent molecules.

The other structures were solved by a charge flipping (Superflip)<sup>S2</sup> method or by direct methods using SHELXS-97<sup>S3</sup> software. Structures were refined with SHELXL-2017<sup>S3</sup> programs. The low-quality crystal of **4** was solved as a racemic twin. The BASF value was refined to 0.039. The chiral space group  $P2_12_12_1$  gave the best results. Also, some CF<sub>3</sub> moieties were slightly disordered. To avoid using a series of additional strong constraints and restraints, no disorder model was used for the final refinement. However, the anisotropic displacement parameters were constrained on series of atoms to avoid non positive definite U-values. The crystal of **5** was found to be twinned (twin matrix [-1.000 0.000 0.000 0.000 -1.000 0.000 0.000 0.000 -1.000]). The BASF value was refined to 0.024. The fluorines in one of the CF<sub>3</sub> groups were disordered over two sites with occupancy ratio of 0.52/0.48. Fluorine atoms F4 - F7 were restrained so that their U<sub>ij</sub> components approximate to isotropic behavior. The crystal of compound **8** contained ca. ¼ disordered and partially lost hexane of crystallization per Ru cluster. However, no stable model could be obtained for the disordered solvent and therefore it was omitted from the final model. The contribution of the missing solvent to the calculated structure factors were taken into account by using the SQUEEZE routine of PLATON.<sup>S4</sup> In compound **17** one of the phenyl rings was disordered over two sites with occupancy ratio of 0.49/0.51. The five carbon atoms of the disordered groups were fitted to a regular hexagon (C-C = 1.39 Å) and the anisotropic displacement parameters were set to be equal. Hexane of crystallization was disordered forming a chain-like string. Because of that disorder the atoms in hexane was refined with occupancies of 0.25. Furthermore, all carbon atoms in the hexane molecule were restrained with effective standard deviation 0.01 so that their U<sub>ij</sub> components approximate to isotropic behaviour. The hydride hydrogens in compounds **3**, **5** and **20** were located from the difference Fourier map and refined isotropically. In compounds **8** and **17** the hydride hydrogens were located from the difference Fourier map but constrained to ride on one of the related Ru atoms with  $U_{iso}=1.2-1.5 U_{eq}(\text{Ru atom})$ . In **4**, the hydride hydrogens could not be located from the difference Fourier map and they were placed on the most likely positions and constrained to ride on one of the parent Ru atoms with  $U_{iso}=1.5 U_{eq}(\text{Ru atom})$ .

S1. (a) V. Petricek, M. Dusek, L. Palatinus, (2014). *Z. Kristallogr.* **229**, 345-352. (b) V. Petricek, M. Dusek, J. Plasil, (2016). *Z. Kristallogr.* **231**, 583-599.

S2. L. Palatinus, G. Chapuis, *J. Appl. Cryst.* **2007**, *40*, 786-790.

S3. G.M. Sheldrick, *Acta Cryst.* **2015**, *C71*, 3-8.

S4. A.L. Spek, *Acta Cryst.* **2009**, *D65*, 148-155.

**Table S1** Crystallographic data for clusters  $[(\mu\text{-H})_2\text{Ru}_3(\mu_3\text{-S})(\text{CO})_7(\mu\text{-P-P}^*)]$  **3-6, 8, 17** and **20**, where (P-P\* = **1a, 1a, 1b, 1b, 1c, 1h** and **2b**, respectively).

|                                            | <b>3</b>                                                                                             | <b>4</b>                                                                                             | <b>5</b>                                                                                             | <b>6</b>                                                                                                                       | <b>8</b>                                                                          | <b>17</b>                                                                                                         | <b>20</b>                                                                         |
|--------------------------------------------|------------------------------------------------------------------------------------------------------|------------------------------------------------------------------------------------------------------|------------------------------------------------------------------------------------------------------|--------------------------------------------------------------------------------------------------------------------------------|-----------------------------------------------------------------------------------|-------------------------------------------------------------------------------------------------------------------|-----------------------------------------------------------------------------------|
| empirical formula                          | C <sub>53</sub> H <sub>34</sub> F <sub>12</sub> FeO <sub>7</sub> P <sub>2</sub><br>Ru <sub>3</sub> S | C <sub>53</sub> H <sub>34</sub> F <sub>12</sub> FeO <sub>7</sub> P <sub>2</sub><br>Ru <sub>3</sub> S | C <sub>53</sub> H <sub>34</sub> F <sub>12</sub> FeO <sub>7</sub> P <sub>2</sub><br>Ru <sub>3</sub> S | C <sub>106</sub> H <sub>68</sub> F <sub>24</sub> Fe <sub>2</sub> O <sub>14</sub> P <sub>4</sub> Ru <sub>6</sub> S <sub>2</sub> | C <sub>49</sub> H <sub>50</sub> FeO <sub>7</sub> P <sub>2</sub> Ru <sub>3</sub> S | C <sub>101</sub> H <sub>83</sub> Fe <sub>2</sub> O <sub>14</sub> P <sub>4</sub><br>Ru <sub>6</sub> S <sub>2</sub> | C <sub>43</sub> H <sub>46</sub> FeO <sub>7</sub> P <sub>2</sub> Ru <sub>3</sub> S |
| fw                                         | 1463.86                                                                                              | 1463.86                                                                                              | 1463.86                                                                                              | 2928                                                                                                                           | 1203.95                                                                           | 2426.79                                                                                                           | 1127.86                                                                           |
| temp (K)                                   | 170(2)                                                                                               | 170(2)                                                                                               | 100(2)                                                                                               | 293                                                                                                                            | 170(2)                                                                            | 170(2)                                                                                                            | 170(2)                                                                            |
| $\lambda$ (Å)                              | 0.71073                                                                                              | 0.71073                                                                                              | 0.71073                                                                                              | 0.71073                                                                                                                        | 0.71073                                                                           | 0.71073                                                                                                           | 0.71073                                                                           |
| cryst syst                                 | Orthorhombic                                                                                         | Orthorhombic                                                                                         | Monoclinic                                                                                           | Orthorhombic                                                                                                                   | Orthorhombic                                                                      | Orthorhombic                                                                                                      | Orthorhombic                                                                      |
| space group                                | P2 <sub>1</sub> 2 <sub>1</sub> 2 <sub>1</sub>                                                        | P2 <sub>1</sub> 2 <sub>1</sub> 2 <sub>1</sub>                                                        | Cc                                                                                                   | P2 <sub>1</sub> 2 <sub>1</sub> 2 <sub>1</sub>                                                                                  | P2 <sub>1</sub> 2 <sub>1</sub> 2 <sub>1</sub>                                     | P2 <sub>1</sub> 2 <sub>1</sub> 2 <sub>1</sub>                                                                     | P2 <sub>1</sub> 2 <sub>1</sub> 2                                                  |
| <i>a</i> (Å)                               | 10.9799(5)                                                                                           | 11.9655(4)                                                                                           | 14.9044(2)                                                                                           | 17.9576(9)                                                                                                                     | 10.4751(2)                                                                        | a = 12.11044(17)                                                                                                  | a = 15.06019(16)                                                                  |
| <i>b</i> (Å)                               | 14.7027(5)                                                                                           | 20.1151(5)                                                                                           | 24.9178(4)                                                                                           | 59.4487(11)                                                                                                                    | 17.5460(4)                                                                        | b = 20.7626(4)                                                                                                    | b = 18.1823(2)                                                                    |
| <i>c</i> (Å)                               | 35.1126(9)                                                                                           | 49.045(3)                                                                                            | 14.7954(2)                                                                                           | 10.978(5)                                                                                                                      | 30.9412(8)                                                                        | c = 21.0868(4)                                                                                                    | c = 15.73196(19)                                                                  |
| $\alpha$ (deg)                             | 90                                                                                                   | 90                                                                                                   | 90                                                                                                   | 90                                                                                                                             | 90                                                                                | 90                                                                                                                |                                                                                   |
| $\beta$ (deg)                              | 90                                                                                                   | 90                                                                                                   | 99.8870(10)                                                                                          | 90                                                                                                                             | 90                                                                                | 90                                                                                                                | 90                                                                                |
| $\gamma$ (deg)                             | 90                                                                                                   | 90                                                                                                   | 90                                                                                                   | 90                                                                                                                             | 90                                                                                | 90                                                                                                                |                                                                                   |
| <i>V</i> (Å <sup>3</sup> )                 | 5668.4(3)                                                                                            | 11804.5(8)                                                                                           | 5413.18(14)                                                                                          | 11720(6)                                                                                                                       | 5686.9(2)                                                                         | 5302.14(16)                                                                                                       | 4307.87(8)                                                                        |
| <i>Z</i>                                   | 4                                                                                                    | 8                                                                                                    | 4                                                                                                    | 4                                                                                                                              | 4                                                                                 | 2                                                                                                                 | 4                                                                                 |
| $\rho_{\text{calc}}$ (Mg/m <sup>3</sup> )  | 1.715                                                                                                | 1.647                                                                                                | 1.796                                                                                                | 1.6589                                                                                                                         | 1.406                                                                             | 1.520                                                                                                             | 1.739                                                                             |
| $\mu$ (Mo K $\alpha$ ) (mm <sup>-1</sup> ) | 1.216                                                                                                | 1.168                                                                                                | 1.274                                                                                                | 1.177                                                                                                                          | 1.166                                                                             | 1.252                                                                                                             | 1.533                                                                             |
| No. reflns.                                | 31467                                                                                                | 42539                                                                                                | 50958                                                                                                | 249874                                                                                                                         | 16529                                                                             | 25373                                                                                                             | 115230                                                                            |
| Unique reflns.                             | 12988                                                                                                | 26879                                                                                                | 20611                                                                                                | 23804                                                                                                                          | 12194                                                                             | 14236                                                                                                             | 17855                                                                             |
| GOOF (F <sup>2</sup> )                     | 1.008                                                                                                | 1.073                                                                                                | 1.027                                                                                                | 1.94                                                                                                                           | 1.008                                                                             | 1.045                                                                                                             | 1.077                                                                             |
| R <sub>int</sub>                           | 0.0541                                                                                               | 0.0800                                                                                               | 0.0227                                                                                               | 0.0497                                                                                                                         | 0.0222                                                                            | 0.0555                                                                                                            | 0.0583                                                                            |
| R1 <sup>a</sup> ( <i>I</i> ≥ 2 $\sigma$ )  | 0.0521                                                                                               | 0.1029                                                                                               | 0.0218                                                                                               | 0.0675 ( <i>I</i> ≥ 3 $\sigma$ )                                                                                               | 0.0322                                                                            | 0.0503                                                                                                            | 0.0300                                                                            |
| wR2 <sup>b</sup> ( <i>I</i> ≥ 2 $\sigma$ ) | 0.0781                                                                                               | 0.1685                                                                                               | 0.0511                                                                                               | 0.1872 ( <i>I</i> ≥ 3 $\sigma$ )                                                                                               | 0.0629                                                                            | 0.1054                                                                                                            | 0.0608                                                                            |

<sup>a</sup>  $R1 = \sum ||F_o| - |F_c|| / \sum |F_o|$ . <sup>b</sup>  $wR2 = [\sum [w(F_o^2 - F_c^2)^2] / \sum [w(F_o^2)^2]]^{1/2}$ . <sup>c</sup>  $w = 1 / (\sigma^2(I) + 0.0049 I^2)$
